# Supplementary material for: Development of a forecast-oriented km-resolution ocean-atmosphere coupled system for Western Europe and evaluation for a severe weather situation
Source: Copernicus journal article supplement (doi:10.5194/nhess-2021-226), 2021-08-02
Supplement: Supplementary file [file nhess-2021-226-AC1-supplement.pdf]

Reply to Reviewers

manuscript number : **nhess-2021-226**

entitled : *"Development of a forecast-oriented km-resolution ocean-atmosphere coupled system for Western Europe and evaluation for a severe weather situation"*

authors : Joris Pianezze, Jonathan Beuvier, Cindy Lebeauin Brossier, Guillaume Samson, Ghislain Faure, and Gilles Garric

---

**Reviewer 1**

---

**Review of "Development of a forecast-oriented km-resolution ocean-atmosphere coupled system for Western Europe and evaluation for a severe weather situation" by Joris Pianezze et al., <https://doi.org/10.5194/nhess-2021-226>**

This study by Pianezze et al. presents a kilometer-scale atmosphere-ocean coupled system newly developed to improve the forecasts over the northeastern Atlantic and western Mediterranean seas. Additionally, during the 12-19 October 2018 storm event, on one hand, the performances of the new system are assessed and, on the other hand, a sensitivity study of the impact of the coupling is performed. I believe the development and use of km-scale atmosphere-ocean models should be promoted as it has been proven in many studies that these models improve both forecasts and climate projections. However, in my opinion, this particular study has failed to demonstrate the interest of such numerically expansive modelling suite and thus cannot be published without taking into account the major corrections described below.

Thank you for your constructive review of our article. You will find our answers to your comments (in blue) below, with clarifications for changes done in the manuscript.

**Major comments :**

(1) Design of the coupled system :

At the strategic level, it is extremely difficult to understand why the modelling system does not use similar grids in the atmosphere and ocean and thus reduce the computations by exchanging the fields

between the two grids without any interpolation. In the actual configuration the size of the two grids is nearly identical and the fields are interpolated, so there is absolutely no computational gain and, in my opinion, no justification for such a strategy.

Additionally, the design of the ocean model which ignores the Baltic Sea, the Adriatic Sea and the border east of Sicily is a bit strange as it covers seas that in fact are not modelled and then could have been limited to the previous operational setup (NEATL36). Overall, it feels that atmospheric and ocean grids were designed separately and patch up together for the coupled system.

This leads to my last point. Not imposing SST from ocean model to the atmospheric model particularly on the open Atlantic boundary seems a strange choice. It will definitely create a discontinuity in the SST field imposed on the atmospheric model and avoiding these kind of discontinuities which can translate into numerical “shocks” is a basic modelling concept. In brief, I would strongly recommend to rethink a modelling strategy that fluidly allows the atmospheric and ocean models to exchange fields over their entire domains without any grey zones (as presented in Fig. 1 and A1). At the very least, the authors must merge figures 1 and A1 and discuss at length the different drawbacks of their modelling strategy and how they could be fixed and why they are not.

The starting point of our coupled system development is the NEATL36/IBI operational system. It inherits of the MOI global system ORCA grid which is a tri-polar grid projection. The NEATL36 domain is a regional ORCA grid at  $1/36^\circ$ -resolution, where the Baltic, Adriatic and Tyrrhenian Seas are not represented. In the Mediterranean Sea, the eastern open boundaries of NEATL36 are located along a line across Corsica and Sardinia.

For operational oceanography purposes, a relatively small extension of this domain was decided, notably motivated by the objective to better cover the whole continental french coasts. The NEATL36 has thus been extended in eNEATL36 in order to cover the whole Western Mediterranean Sea (and so the eastern coasts of the French Riviera and Corsica). So, the insertion of the Tyrrhenian Sea is the only change of the basin we considered, and consequently eNEATL36, as NEATL36, does not reproduce the Baltic and Adriatic Seas. Looking at Figure 1, one can see that in fact the Adriatic Sea is disconnected from the rest of our ocean domain, but information comes across the Mediterranean open boundary which is now a southern boundary located across the Sicily Channel. The Baltic Sea is of course fully included in the global system, that is used to provide ocean lateral conditions at the eastern open boundary between Sweden and Poland.

The AROME domain was then after chosen to cover the eNEATL36 domain, but knowing that the ORCA projection is not an option for AROME (the development of such grid projection would have been a huge effort with an unknown gain). Knowing that identical grids were not reachable in our case, we choose to have a larger atmospheric domain than for ocean. This choice is quite common for regional coupled

systems, and is argued by the fact that i) SST is well observed/analysed and thus a SST field completion appears easier and ii) considering air-sea interactions, a SST discontinuity seen by the atmosphere could be considered as less critical than a wind (or wind stress) discontinuity seen by the ocean. The AROME domain has been rotated (compared to the AROME-France domain) in order to have parallel western boundaries for AROME and NEMO, but also we took care to have a small band to avoid spurious fields related to the Davies' zones of AROME to affect NEMO.

Thus with this grids configuration, the SST seen by AROME in OA indeed combines the explicit NEMO SST with the initial analysed SST close to its boundaries. Figure A shows the full SST field seen by AROME at the initial time and after 7 days of simulation. Indeed, as in the grey zones of AROME the

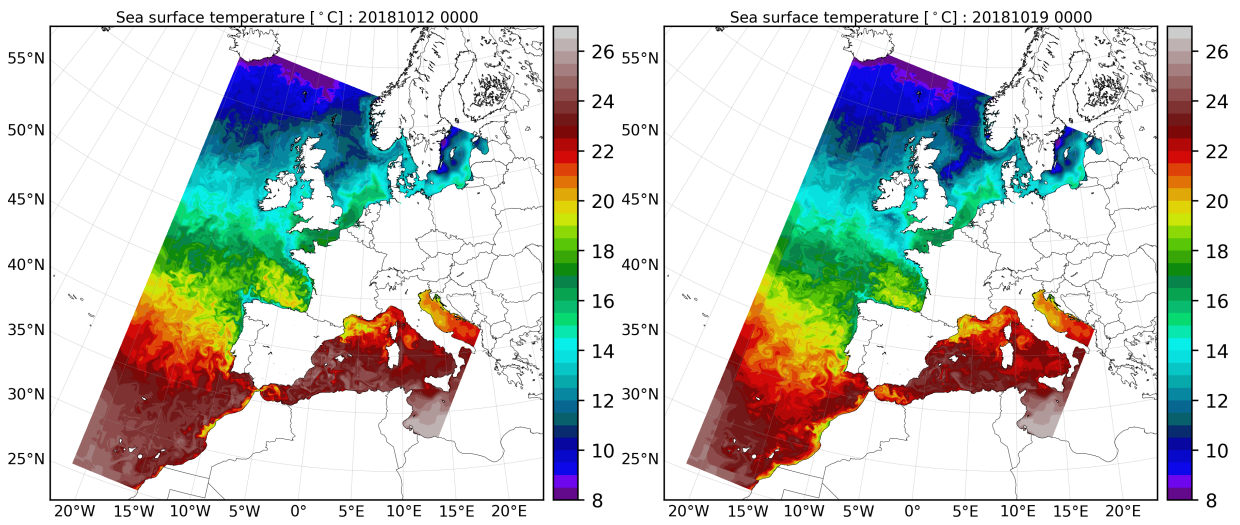

FIGURE A – Sea surface temperature ( $^{\circ}\text{C}$ ) seen by AROME (mask and unmasked areas) in the OA experiment at the initial time (20181012 0000UTC, left panel) and at the end of the simulation (20181019 0000UTC, right panel).

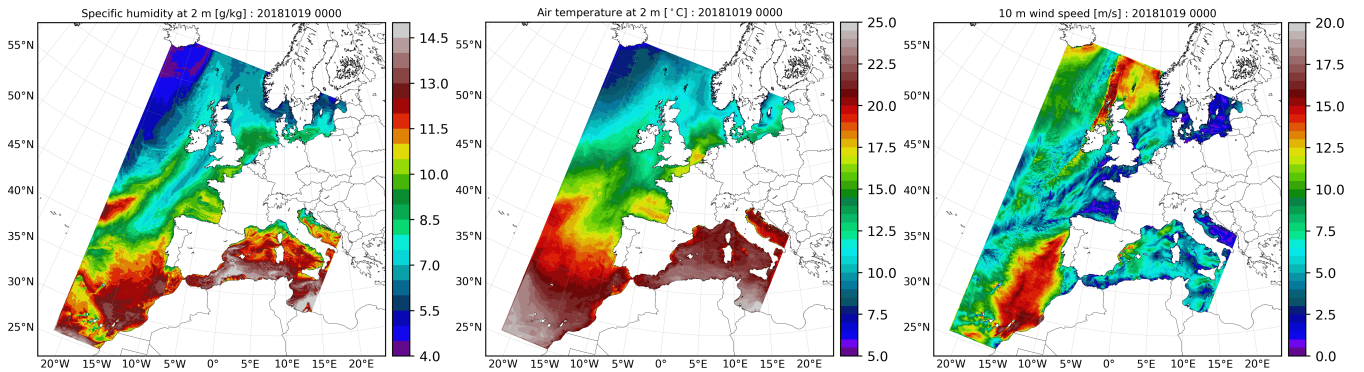

FIGURE B – 2 m-specific humidity (left, g/kg), 2 m-air temperature (middle,  $^{\circ}\text{C}$ ), and 10 m-wind speed velocity (right, m/s) at the end of the OA simulation (20181019 0000UTC).

SST comes from the  $1/12^\circ$ -resolution global system of MOi, and also stays constant during the coupled forecast, a more marked SST discontinuity appears progressively during the forecast. The largest SST discontinuity appears close to the western boundary, because of the marked ocean surface cooling in OA (see Figure 3d in the manuscript). SST discontinuities in the Sicily Channel or at the exit of the Baltic Sea are less discernible. To evaluate the effects of these discontinuities on the simulated 2m air humidity, temperature and 10 m wind speed in the OA simulation, the AROME simulated fields are presented in Fig. B for the +168h forecast-range, *i.e.* after 7 days of forecast when the SST discontinuities are the most significant. We can note that only a relatively small signature of the SST discontinuities is found at low level, notably in the southern (south-western) part of the domain, while elsewhere (in the Sicily Channel or in the Baltic Sea for instance), the atmospheric near surface parameters are not affected by the SST

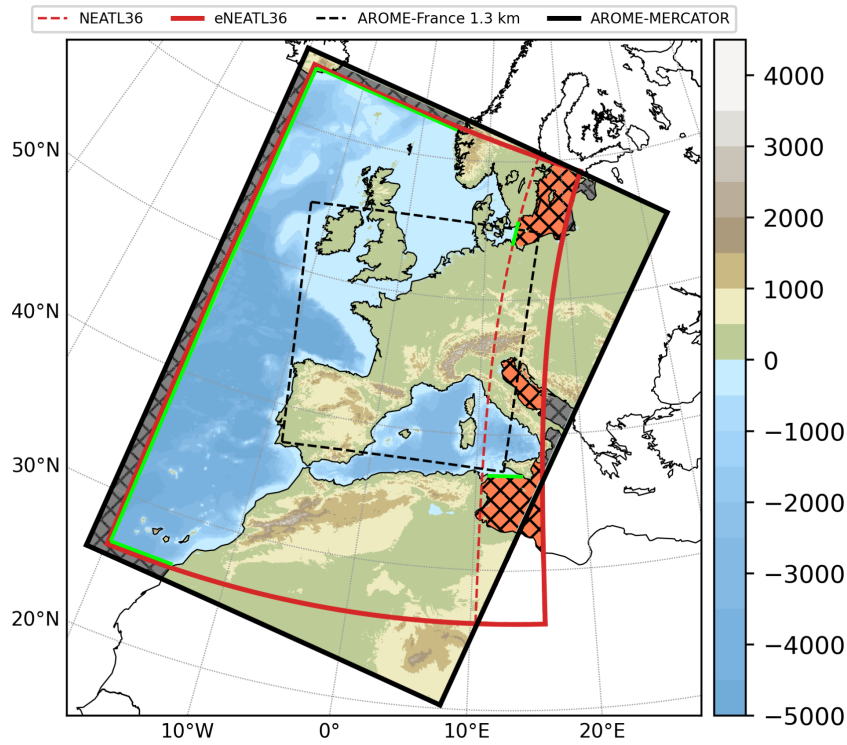

FIGURE C – *New Figure 1 (Old Figure 1 merged with old Figure A.1).* *Caption :* Simulation domain illustrated by the bathymetry [m] in NEMO (in blue) and by the orography [m] of the AROME model (in green-brown colors). The lines indicate the boundaries of NEMO-eNEATL36 configuration (red) and of the AROME-Mercator domain (black); the green lines highlight the open boundaries in the oceanic model. For AROME-Mercator, the grey and orange marine zones are always uncoupled (constant initial SST and null current are used, see text). For eNEATL36, the orange marine zones are not solved in the regional oceanic simulations. The dashed lines indicate the boundaries of the actual operational configurations of AROME (AROME-France, 1.3 km-resolution, in black) and NEMO over the Iberia-Biscay-Ireland (IBI) region (NEATL36,  $1/36^\circ$ -resolution, in red).



discontinuity (Fig. B). In particular, the northern and western boundaries of AROME are in fact more largely constrained by the incoming atmospheric lateral conditions and their space-time variability.

To manage the two different grids, the interpolation of the exchanged fields is done by OASIS through the remapping option, distributed on the different computing process units, with weight fields computed in advance. The numerical cost of interpolations during the forecast is completely negligible. Note that the same kind of interpolations is necessary in the forced mode.

To better explain the simulation strategy and the grids/masks management, the Figure presenting the simulation domain has been reviewed as suggested by merging Figure 1 with Figure A.1 (see Figure C, here). For clarity, the open boundaries of the new NEMO configuration have been highlighted with green lines. Several text modifications have been inserted at the beginning of section 2 and in section 2.3 about the coupling strategy. Also, sections 2.1 and 2.2 have been reversed so the reader could better follow the domains design (ocean first then atmospheric model).

## (2) Evaluation of the modelling system :

First, testing the model on one storm event does not represent de facto an evaluation of a complex atmosphere-ocean modelling suite. It is merely a test of the capacity/performance of the model during a specific event. However, the authors did a nice sensitivity study on the impact of the coupled system on the results. I would thus recommend to highlight the sensitivity study aspect and not the evaluation aspect in their article. A more appropriate title for their study could be something like : “Sensitivity to coupling of a forecast-oriented km-resolution ocean-atmosphere system during a severe weather situation”.

We agree that, as we only investigate one case, the term ”sensitivity” appears more appropriate than ”evaluation” that implies a larger period of verification with successive forecasts, but also a careful verification of improvements compared to current operational runs. The study presented here is more a sensitivity study to coupling done with two forecast-oriented models.

The new title of the paper is : ”*Development of a forecast-oriented km-resolution ocean-atmosphere coupled system for Western Europe and **sensitivity study** for a severe weather situation*”

Second, the authors mention the configuration of the operational system actually in use and composed of AROME (AROME-France, 1.3 km-resolution) and NEMO over the Iberia-Biscay-Ireland (IBI) region (NEATL36, 1/36°-resolution). The comparison of the performances of this system with their newly developed system thus seems a mandatory step to show the interest of their developments. This is an important missing part of the study and some clues on how the new model outperforms (or not) the already widely

use system should be provided.

The actual operational systems are uncoupled and are operated separately by Météo-France for Numerical Weather Prediction and by Mercator Ocean International/Puerto del Estados for regional operational oceanography over the IBI area.

At Météo-France, AROME is used for various high-resolution regional forecast kinds. Over continental France, AROME is used :

- four times a day (00, 06, 12 and 18 UTC) for 42 or 48h-range deterministic forecasts at 1.3 km-resolution (see the domain in Figure 1, dashed black box), using a 3D-var assimilation scheme and the ARPEGE forecasts at its boundaries. This is called AROME-France ;
- twice a day (00 and 12 UTC) for 48h-range deterministic forecasts at 2.5 km-resolution (same domain extension as AROME-France), using IFS forecasts as atmospheric initial and boundary conditions, and AROME-France analysis for surface initial conditions including SST. No assimilation is done. This forecast set-up is called AROME-IFS in the paper and hereafter.
- four times a day (03, 09, 15, 21 UTC) for 45h-range ensemble predictions with 16 members (12 members before July 2019) at a 2.5 km-resolution (same as AROME-IFS). It is called PEARO forecasts.

The closest operational configuration of AROME we can compare to our coupled model is thus AROME-IFS, but knowing that in October 2018, AROME-IFS used a former code version (cy42, against cy43t2 in our study) and used initial conditions of IFS at a coarser resolutions (both horizontal and vertical) to drive AROME than our study. It uses the ARPEGE SST analysis (against the global [GLO12] MOi analyses in this study) and it covers a smaller domain (the same as AROME-France, see Fig. 1) and a shorter period (until 00 UTC 14 October, for the forecast starting on 12 October 00 UTC). This means than comparing ARO with AROME-IFS necessitate to consider all these features, while the ARO/OA comparison clearly shows the interactive coupling impact. In fact, the AROME-IFS operational forecast starting on 12 October 2018, 00UTC, shows results quite close to the IFS forecast. As an example, the wind forecast by AROME-IFS is presented in Figure D and compared to the OA experiment (see also Fig. J d,g), as well as to satellite observations. The wind induced by Callum in AROME-IFS appears clearly more realistic. We still need to investigate several hypothesis, notably in the AROME physical options, to explain the Callum wind intensification overestimation in our ARO and OA experiments. Nevertheless, the comparison of ARO with OA stays fully valid to evaluate the sensitivity to coupling.

For operational oceanography, the regional system IBI (Irish Biscay Iberia area) is operated weekly for the Copernicus Marine Service. It is based on the NEATL36 model configuration. The current version of this system was not in operation in October 2018, thus only the sequence of analyses is available as operational products for that period of time (no forecasts). To stay close to the version of the IBI/NEATL36 system currently in operation, we chose to perform the OCE-ifs simulation, which we consider as a re-

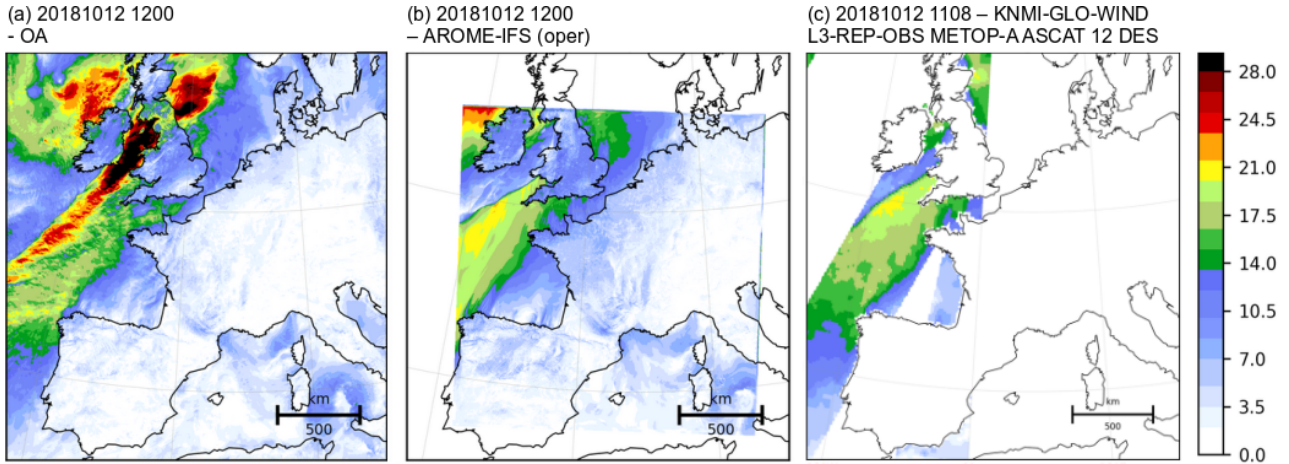

FIGURE D – Comparison of the 10 m-wind speed forecast for 12 October 2018 1200 UTC by (a) OA and (b) the operational AROME-IFS forecast (starting on 12 October 2018 00 UTC) with (c) wind satellite observations (ASCAT) for 12 October 2018, at 11 08UTC.

forecast of the 12-19 October 2018 period by a system close to the actual operational one, except for the small spatial extension in the Tyrrhenian Sea.

In summary, we chose to insert the ocean-atmosphere coupling in the most recent code versions of the two regional operational systems. The experimental set-up was designed to investigate, during a sequence of severe events, the high-resolution atmospheric representation and the coupling impacts on both forecasts, with the clear objective to avoid other numerical changes that can perturb the comparison. We agree again that the "evaluation" term in the initial title was not accurate and would have necessitate the full comparison with operational real-time runs. We think the new title referring to a "sensitivity study" is now more relevant.

Third, the sensitivity to coupling should be presented for all comparison with observations. For example, Fig. 4 should show the spatial differences also for  $SST_{OCE-if_s} - SST_{sat}$  &  $SST_{OCE-aro} - SST_{sat}$ .

Following your comment, Figure 4 has been modified to include a comparison with simulations OCE-ifs, OCE-aro and ARO (Fig. E). We also remove the simulated SST fields and only plot the differences between the simulated SST and the satellite observation at the end of the simulation (+168 h).

Fourth, the structure of section 4 is extremely hard to follow and overall confusing. In my opinion, for each sub-section, the authors should systematically, first present the performance against observations (for all experiments) and then the comparison between experiments. (e.g. 4. Sensitivity to coupling, 4.1 Sea surface temperature, 4.1.1 performance, 4.1.2 sensitivity, 4.2 Temperature, salinity, height, currents and

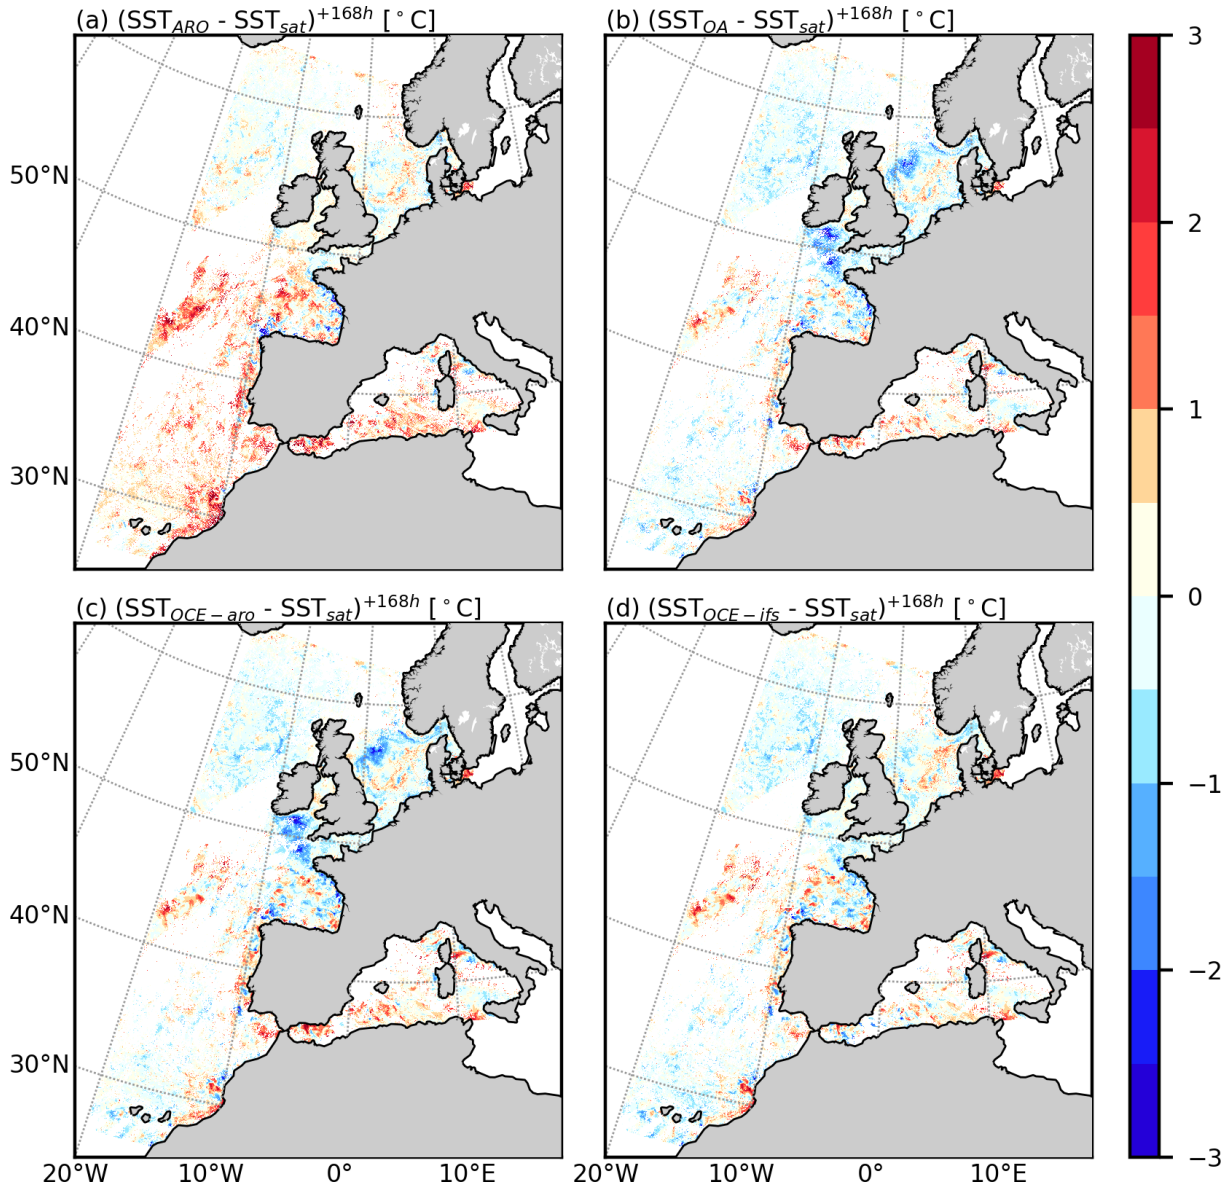

FIGURE E – *New Figure 4. Caption : Comparison with L3 satellite SST observations at the end of the simulation (19 October 2018 00 UTC) : differences (in °C) with (a) ARO SST, (b) OA simulated SST, (c) OCE-aro simulated SST and (d) OCE-ifs simulated SST.*

ocean mixed layer, 4.2.1 performance, 4.2.2 sensitivity, 4.3 wind, 4.3.1 performance, etc.).

We are sorry the initial structure of the results presentation, with a subsection dedicated to the coupled simulation examination, was difficult to follow with these go-backs in the figures.

The results section has been fully reviewed and re-ordered following your comment, which was also

raised by the second reviewer. We chose to keep two subsections : “4.1. Oceanic forecast 4.1.1. Sea surface temperature 4.1.2. Sea surface dynamics, salinity and ocean mixed layer” and “4.2. Atmospheric forecast 4.2.1. Wind 4.2.2. Rainfall” .

Finally, some sub-sections do not have any comparison with observations (e.g. 4.1.2 or 4.1.4). If finding observations in the ocean is a difficult task and should be acknowledge, I believe that the authors can have access to many land-based coastal weather stations that would provide observations of rain but also wind. I would also recommend to check the availability of Argo float measurements or other ocean observations (e.g. CTD) during the time of the numerical experiments. Overall, this study could benefit from a bigger number of observations to assess the performances of the different experiments. Indeed, for the moment, some comparisons done in Fig. 6, Fig. 7, Fig. 8, Fig. 11 and Fig. 12 seem relatively pointless as we truly don't know how each experiment performs against observations for any the compared variables.

For rainfall (former section 4.1.4), the IFS forcing does not cover land surfaces. This is due to the operational extraction done at MOI, e.g. before interpolation land values are masked and oceanic values are extrapolated onto land domain to avoid taking land values into account when interpolating over the ocean. Rainfall estimation over sea are also too rare to perform any validation. The conclusion of our sensitivity study is that ARO and OA produce quite similar forecast in term of rainfall chronology and large-scale structures, but with some convective systems displacements that can lead to large differences locally (see Figure 13 (old Figure 11) b,f over the Balearic Sea for instance).

For salinity (former section 4.1.2), an operational validation tool was applied on our two forced ocean-only experiments (OCE-ifs and OCE-aro simulations). Figure F(c,d) presents the comparison to 13.5 m-depth salinity in-situ observations through Root Mean Square Error for the OCE-ifs and OCE-aro simulations. It shows that the change of atmospheric forcing for AROME improves very slightly the salinity RMSE over the period and the whole domain [and that coupling impact is neutral (OA results are similar to OCE-aro, not shown)], but the robustness of this result is difficult to estimate due to the scarcity of in-situ salinity observations.

Applied for temperature at the same depth (Fig. F a,b), the validation tool confirms that better scores are obtained on average for OCE-ifs than for OCE-aro, but local improvements are found when using AROME forcing, notably along Cornwall coasts in the Celtic Sea. Figure F(a,b) has been added in the paper (new Fig. 8) with comments on the simulations representation of the ocean mixed layer that rely on these scores.

### (3) Conclusions of the study :

From the presented results, it is clearly shown that IFS performs better than AROME (coupled or

(a) OCE-ifs – OCE-aro diff. in RMSE for temperature at 13.5 m-depth

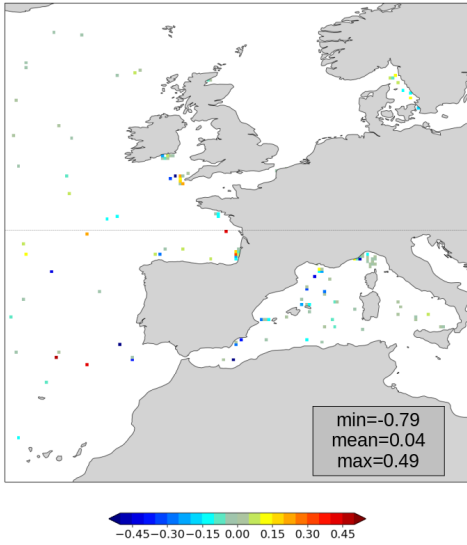

(b) RMSE time-series for temperature at 13.5 m-depth

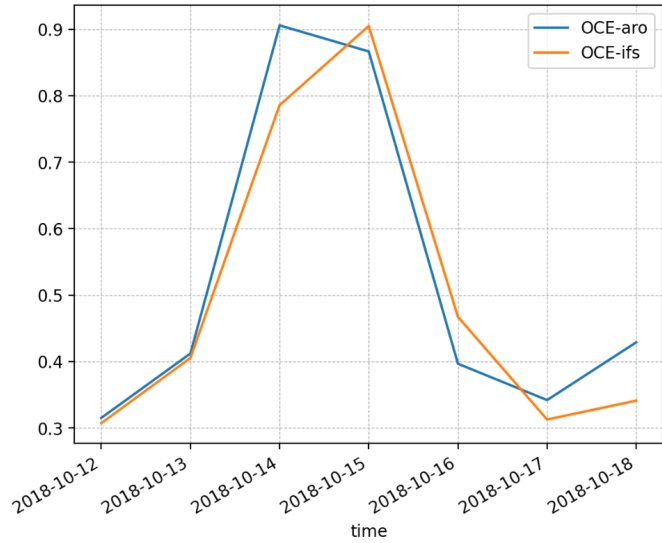

(c) OCE-ifs – OCE-aro diff. in RMSE for salinity at 13.5 m-depth

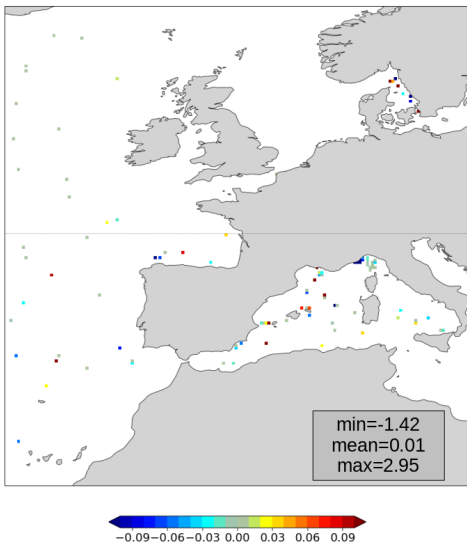

(d) RMSE time-series for salinity at 13.5 m-depth

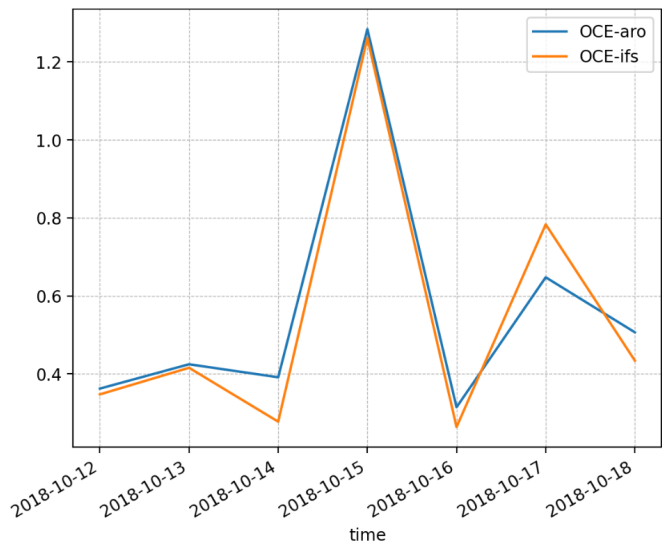

FIGURE F – Comparison with *in-situ* profiling platforms (Argo floats, CTD profiles, mooring, gliders and drifting buoys) for (a,b) temperature in  $^{\circ}C$  and (c,d) salinity in psu, at 13.5 m-depth. (a,c) Differences in RMSE between OCE-ifs and OCE-aro (blue means better scores for OCE-ifs). (b,d) RMSE time-series for OCE-aro and OCE-ifs experiments. Subplots a and b are now inserted in the manuscript (New Figure 8).

uncoupled) (i.e. better comparison for wind speed measurements and comparison with SST buoys similar



for all ocean experiments) and thus (again with the limited presented comparisons with observations) it feels pointless to develop a complex atmosphere-ocean model which will use a lot of numerical resources while a NEMO model forced with IFS seems to provide better results. I truly believe that the presented results do not properly reflect the performances of the newly developed model but as it stands the study does not demonstrate the interest of such a model and this should be emphasis in the conclusions and in the abstract.

Despite the wind overestimation associated to Callum in ARO/OA, the AROME performance compares quite well with IFS. And thus considering the whole simulated period and domain, OCE-ifs and OCE-aro appears quite similar except the too large cooling in the Celtic Sea. The new Figure F which compares OCE-aro and OCE-ifs scores for temperature and salinity at 13.5m, tends also to moderate the conclusion of a better performance of IFS. AROME represents accurately the storms trajectories, and is able to produce a heavy precipitation event over South-Eastern France with a good timing despite a long forecast range. The atmospheric processes represented by AROME have a finer scale ; it is know that such fine scale representation can lead to a “double penalty” phenomena (e.g Rossa et al., 2008; Crocker et al., 2020) when compared to punctual observations, especially with a scattered observation network as for atmospheric in-situ measurement over sea. This double-penalty effect can also affect the ocean compartment by combination of its own high-resolution and of the atmospheric forcing/coupling high resolution, with for instance local salinity response to high-resolution precipitation.

As you pointed out, this study is a first sensitivity analysis based on one case study only. To fully conclude on the coupling benefit, a more systematic comparison must be done. From the NWP point of view, the numerical cost of coupling AROME to NEMO is estimated to be around +5%. Even if the ratio benefits / costs must be more carefully examined, considering the low additional cost and the number of AROME operational forecast instances run daily, we confidently think that high-resolution coupled forecasts are reachable for 2025-2030. We agree that the coupling appears costly for operational oceanography. However, we think we have introduced the scientific and technical interests to commonly build this coupled numerical tool and demonstrated, in that sense, the coupling affordability for mutual applications towards operations.

### **Specific comments :**

The following list of specific comments is pretty succinct as major comments should first be addressed before a more detailed review can be made.

- Lines 60-64 : Efforts done by diverse research groups in the world to develop km-scale atmosphere-ocean coupled operational forecast models should be mentioned (e.g. Indian and western Pacific

Oceans, Hawaii, UK, Adriatic Sea, etc.)

This part of the introduction (lines 60-64) was written more to highlight the additional effort implied by the objective of running operational forecasts with coupled systems, based on the synthesis papers of Brassington et al. (2015) and Pullen et al. (2017) that gather the results of several research groups. It appears difficult to give an exhaustive view of the diverse research groups targeting operational coupled systems. However, new references have been added in the paragraph before, to mention notably the coupled forecast model development efforts for operational purposes over the Maritime Continent (Thompson et al., 2021), over the Gulf of St-Lawrence (Pellerin et al., 2004) or also in the Adriatic Sea (Ličer et al., 2016; Vilibić et al., 2018).

- Lines 165 : feedback of ocean currents to atmospheric models is not state-of-the-art coupling and may be developed a bit more here.

As shown in Renault et al. (2019), the current feedback, by causing surface stress anomalies, modulates the oceanic circulation by slowing down the mean oceanic circulation and dampening the mesoscale activity. To take into account the current feedback, it is necessary to use the relative winds in the computation of air–sea fluxes, i.e., the difference between the near-surface winds and the surface oceanic currents, instead of absolute winds. Because of the implicit treatment of the bottom boundary condition in most atmospheric models, the use of relative winds also necessitates a modification of the tridiagonal problem associated with the discretization of the vertical turbulent viscosity. This second modification was not initially include in the AROME-NEMO coupling of Rainaud et al. (2017) and Lebeaupin Brossier et al. (2017).

The following sentence has been added in Section 2.2 (old 2.1) of the paper to explain a bit more this current feedback implementation : *“The surface current acts in two ways on turbulence by using the relative winds, i.e., the difference between the near-surface winds and the surface oceanic currents, instead of absolute winds (i) in the computation of air–sea fluxes and (ii) in the tri-diagonal problem associated with the discretization of the vertical turbulent viscosity because of the implicit treatment of the bottom boundary condition in the atmospheric model. Only the first effect was included in the former AROME-NEMO couplings (Rainaud et al., 2017; Lebeaupin Brossier et al., 2017; Sauvage et al., 2021).”*

- Figure 1. Please combine with Figure A1 for discussion of the modelling strategy concerning the grids (see major comments).

As you suggested, Figure 1 has been reviewed to combine the previous Figure 1 and A.1 in order to highlight the masked and unresolved areas and to discuss them in the “Coupling strategy” section. This new figure is presented in Fig. C. See also our answer to your major comment.

- Figure 2. Scale of the different sub-plot makes it confusing to understand firsthand what the different

subplot are representing. Plotting coastline and drawing sub-domains (b, c, d) on top of satellite image (panel a) may help reader identify without effort the geographical locations of interest.

To better identify the locations of subplots (b,c,d) on the map with a wide geographic coverage (a), we added colored contours to the different subplots and reported them on the larger one. We also added a dashed outline showing the area of interest. The new figure is presented in Fig. G.

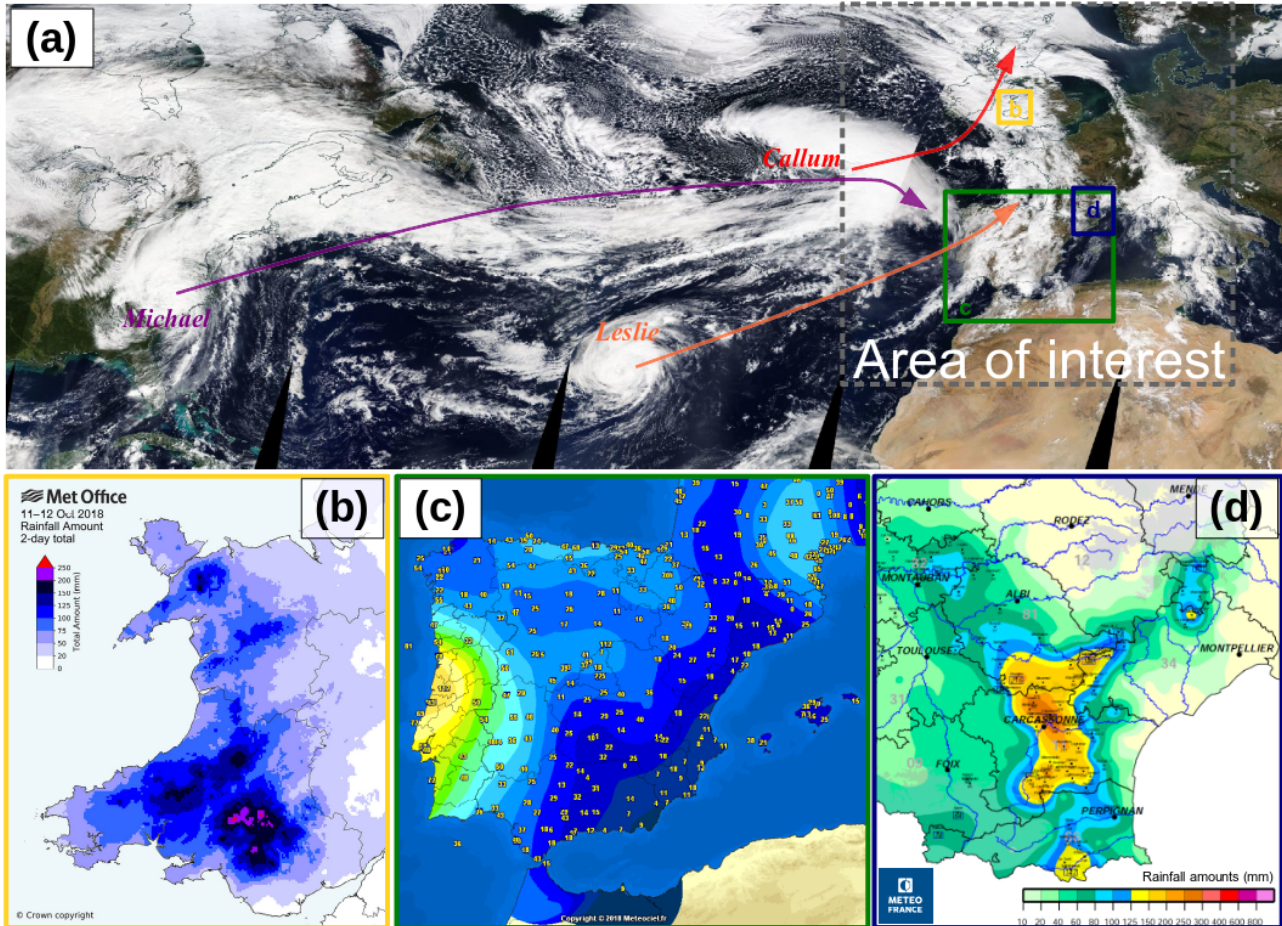

**FIGURE G – New Figure 2 of the paper. Caption :** Illustrations of the case study : (a) True color image of Terra/MODIS (source : <https://worldview.earthdata.nasa.gov/>) on 11 October 2018 over the North Atlantic Ocean showing the storm Callum and the Leslie and Michael hurricanes (arrows depict their trajectories towards the area of interest); (b) Rainfall totals (mm) from 11 to 12 October 2018 over Wales (Callum’s impacts, Figure 64 from Kendon et al., 2019, source: MetOffice); (c) Wind gust observations (km/h) over Iberian Peninsula on 13 October 2018 around 23 UTC (Leslie’s landfall, source : [www.meteociel.fr](http://www.meteociel.fr)); (d) Rainfall amounts (mm) between 06 UTC on 14 October and 06 UTC on 15 October 2018 over the French Languedoc region (Aude event, source : Météo-France - edited 19/02/2019).

- Figure 3. Not sure how this figure is relevant concerning the sensitivity study done in the article. It is obviously expected that during a storm event SST will diverge from initial (i.e. background) conditions. I think this figure is not needed in the main article and may be presented as supplementary material to highlight how the area of interest correspond to the obtained results.

Since Figure 4 now shows sea surface temperature differences, we kept Figure 3 in the core of the article, which is the only figure that shows a SST map. It serves also as a quantification of the SST modifications not represented in ARO.

- Figure 4. Please include comparison of satellite data with all experiments (see major comments). Done. See also our answer to the major comments.

- Figure 5. The legend on the top of the time series as well as on the right hand side of the figure should be increased in size.

The size of the legends on the top of the time series as well as on the right hand side one has been increased.

- Figure 6. Please remove wind from the plot and put wind comparison in a separate figure dealing with wind comparison specifically.

Done. We have removed the wind comparison in Figure 6 (the new Figure 6 is presented in Figure H) and we present now the temporal evolution of the wind speed and the rainfall in a new figure (Fig. I).

- Figures 7 & 8. Interesting figure only if all experiments presented are previously compared with measurements over the full “water column” (e.g. Argo floats, CTDs) in the different zone presented. Otherwise, no conclusion can be drawn except this experiment is similar or different from the coupled one.

The purpose of these Figures is to present the sensitivity of vertical profiles between all the simulations and thus to show the sensitivity to forcing / coupling in the four areas of interests. The areas of interests were identified according to the coupled model results only (*i.e.* without any consideration of the presence of ocean profile observations).

- Figure 9. Please include comparison wind OA - wind IFS. Labels on the top of figures should also be increased in size.

Done. Wind from the IFS forcing has been added in Figure 11 (old Figure 9), but removed from the difference to include buoys measurements. The new figure 11 is presented in Figure J.

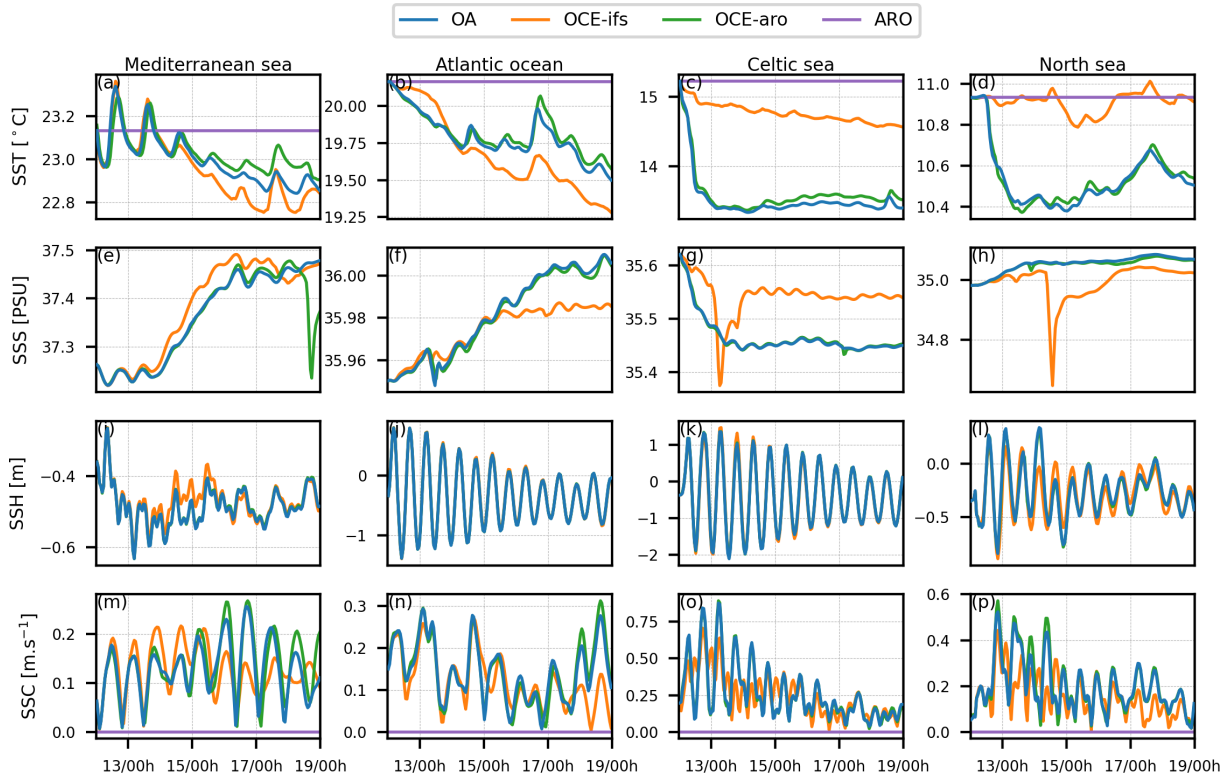

FIGURE H – *New Figure 6 of the paper. Caption : Temporal evolution of simulated sea surface temperature (SST, °C), salinity (SSS, psu), height (SSH, m) and current speed (SSC,  $m s^{-1}$ ) extracted in the four areas presented in Figure 3d. Note that ARO does not have SSS nor SSH.*

— Figure 10. As Figure 2.

This Figure has been changed as Figure 5.

— Figure 11. Please include rainOA - rain IFS

The IFS forcing fields used to drive OCE-ifs is at a lower resolution than the native resolution and in addition only include rainfall forecasts (as other atmospheric parameters) on the sea points (as usually done by the MOi operational download and treatment procedure). We cannot therefore fairly compare the OA simulation with IFS.

— Figure 12. As for Figures 7 & 8, interesting only if all experiments are previously compared to observations in the different zone presented.

The purpose of this Figure is to present the coupling sensitivity and to better quantify the ocean mixed layer responses due to the high-resolution forcing on one side from the response due to the interactive cou-



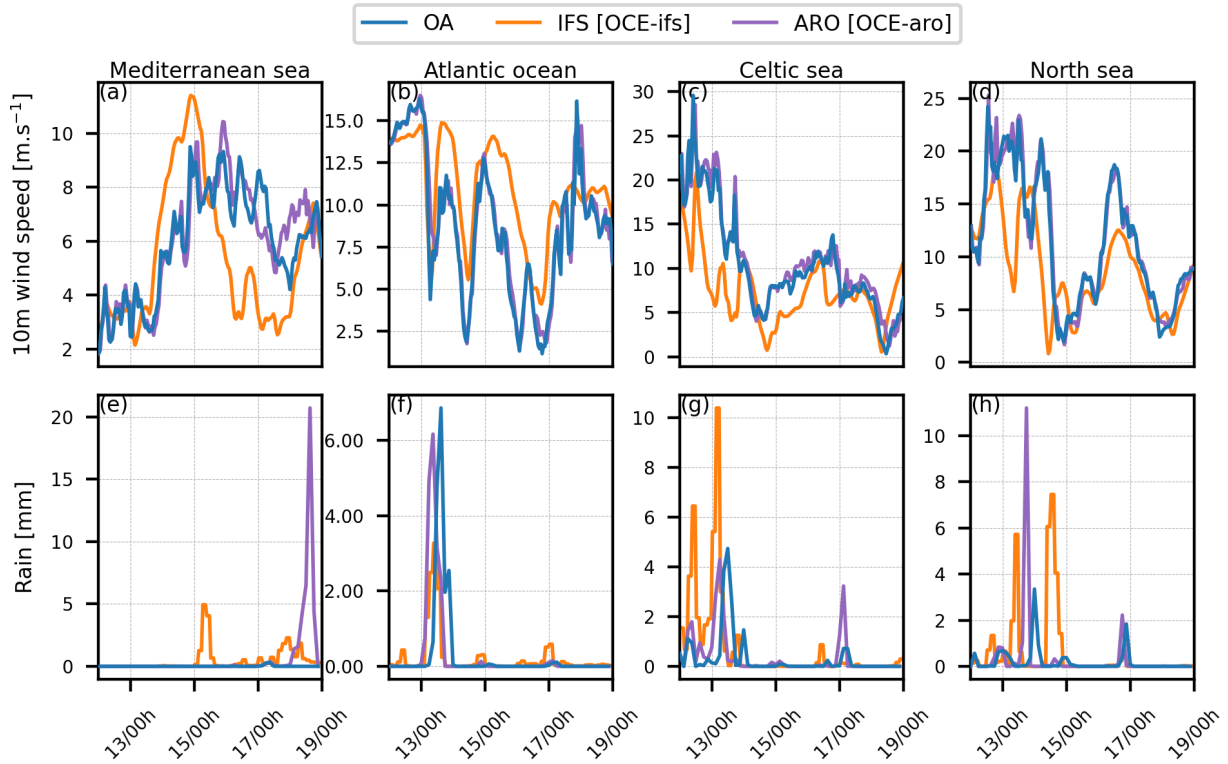

FIGURE I – *New Figure 13 of the paper. Caption : Temporal evolution of simulated 10m wind speed ( $m.s^{-1}$  ; a,b,c,d) and rainfall (mm/h ; e,f,g,h) extracted in the four areas presented in Figure 3d.*

pling on the other side.

- Data availability : From my understanding of the EGU publication rules (I may be wrong), the specific model results (atmosphere and ocean) used in this study should be publicly available as anyone should be able to reproduce the presented findings of the article, but authors mentioned it is only “upon request”.

The section “Statement on the availability of underlying data” of NHESS journal data policy page ([https://www.natural-hazards-and-earth-system-sciences.net/policies/data\\_policy.html](https://www.natural-hazards-and-earth-system-sciences.net/policies/data_policy.html)) indicates that “If the data are not publicly accessible, a detailed explanation of why this is the case is required.”. The coupled and atmosphere-only simulations are not reproducible, due to the AROME code licence which is not public. However, the simulation results are publicly available, but represent a huge volume of data. Consequently our preference goes to the extraction of the simulation results “upon request”, as seen in some other NHESS papers, and as indicated here in the Data availability statement.



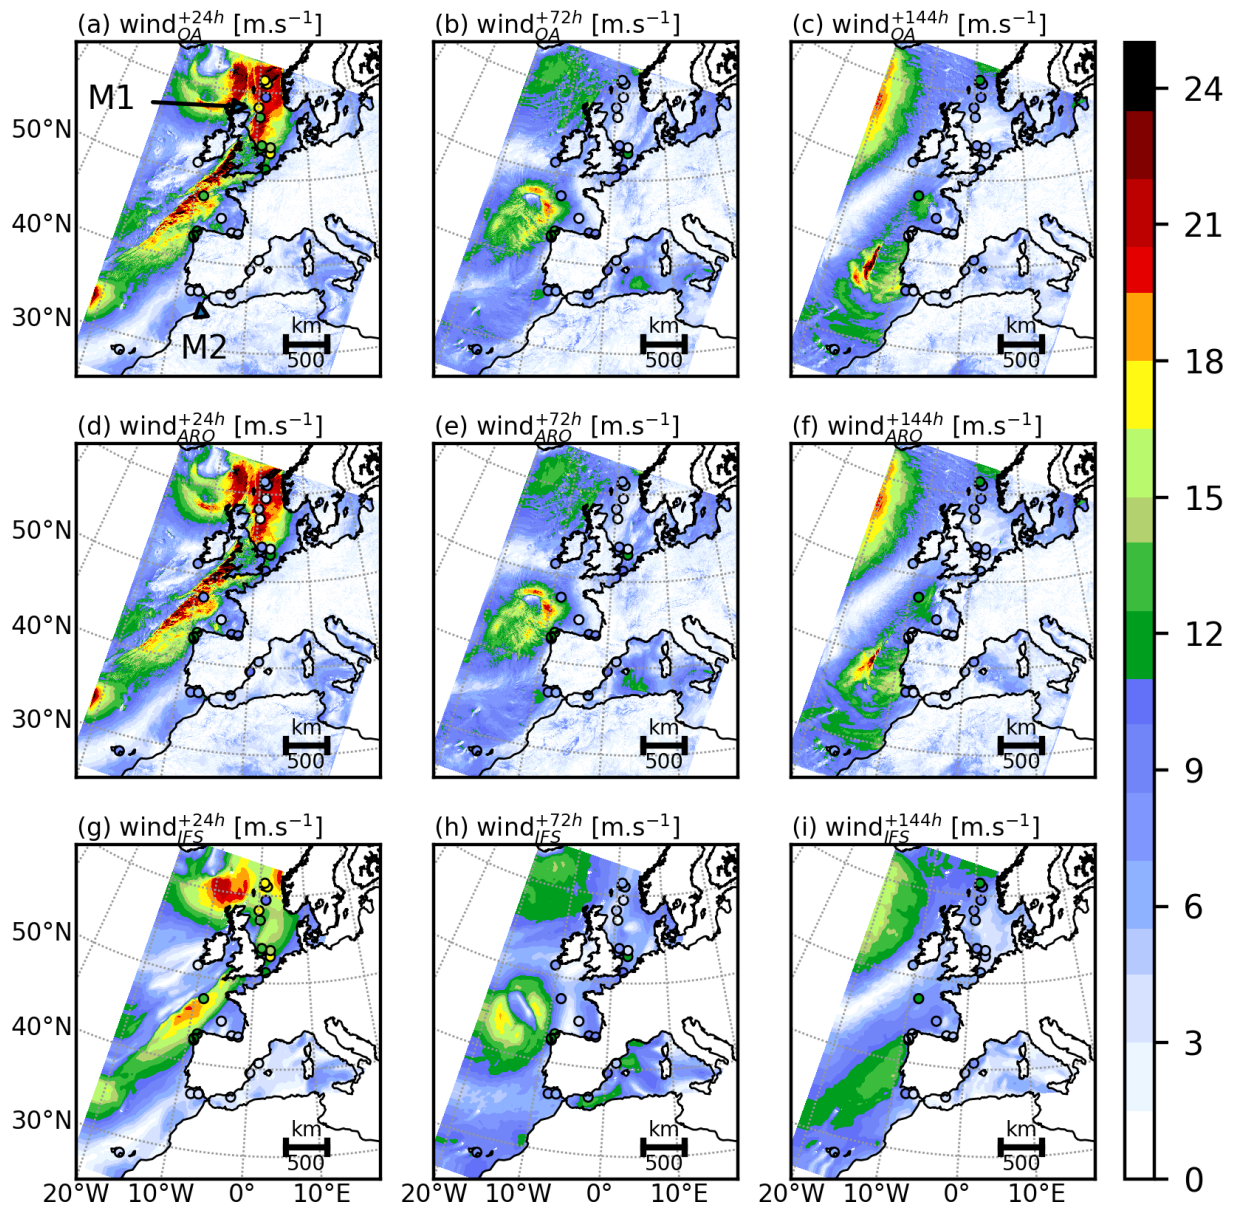

FIGURE J – New Figure 11 of the paper. Caption : Instantaneous 10 m-ASL wind speed ( $m s^{-1}$ ) simulated by OA (a,b,c), ARO (d,e,f) and IFS seen by OCE-ifs (g,h,i), for forecast ranges of (a,d,g) +24h (13 Oct. 2018, 00UTC), (b,e,h) +72h (15 Oct. 2018 00UTC) and (c,f,i) +144h (18 Oct. 2018 00UTC). The colour circles represent the wind speed measured by mooring buoys at that time; M1 and M2 labels in (a) indicate the location of the two mooring buoys used in Figure 12.

---

## Reviewer 2

---

- I suggest to homogenize the way you present the references to used upstream data. For example, introducing ECMWF IFS instead of simply IFS (ln. 123) or global-IFS (which I guess it is the same). IBI is also cited as IBI36 : better to use one unique reference.

Thanks for your comment. We homogenize the references to IFS and IBI. We chose to keep IFS when we refer to ECMWF IFS global operational forecast and IBI when we refer to IBI configuration at  $1/36^\circ$ .

- the user may not know what IBI is. I see you added correct references, however since your model is focusing on a different implementation (since the spatial domain is wider) I suggest to remove in Section 2.2 the specification of where the IBI boundary was or simply specify why you are proposing this new spatial domain more clearly.

Done. We added definition of IBI in the text and not only in the caption of Figure 2.

- you refer to CMEMS many times. It would be good to introduce it once, at the beginning, and cleaning the paper from redundant references like in Section 4.1.1 ln. 261-262.

We added the definition of CMEMS the first time we use it and clean some redundant references.

- It is clear you decided to split presentation of results between validation and evaluation of impact. The impression I got is that in the evaluation of the OA model, the explanation can be a bit confused since you present also forced experiments in the plots : in fact, in the second part of the section where you present the impact of OA coupling, you use the previous plots and explain it. I would focus on discussing evaluation of the OA coupling system directly when you describe the impact, so something like this :

- 4.1 Validation and evaluation of OA coupling on ocean forecast highlighting if and how OA improves skills wrt forced system
- 4.2. Impact of OA coupling on the atmospheric forecast

Following your comment, also common with the first reviewer, the results section has been fully reviewed and re-ordered. We have decided to consider only 2 sections and 2 sub-sections per section : “4.1. Oceanic forecast 4.1.1. Sea surface temperature 4.1.2. Sea surface dynamics, salinity and ocean mixed layer” and “4.2. Atmospheric forecast 4.2.1. Wind 4.2.2. Rainfall”.

- ln. 141-143 : could you please specify the dataset/reference you used for the river runoff?

Thanks for your comment. We add that information and modify the text in consequences : “As in the operational IBI configuration (Sotillo et al., 2015, 2021), rivers freshwater inputs are imposed part as daily OBC in the domain locations for 33 main rivers and part as a climatological coastal runoff to close the water budget from land. For the 33 main rivers explicitly considered, flow-rate data are based on a combination of daily observations, simulated data (from SMHI E-HYPE hydrological model) and climatology (monthly climatological data from GRDC and French “Banque Hydro” dataset).”

— ln. 236 : which bulk are you using in the OCE-ifs ? It would be nice to specify them.

The sea surface bulk parametrization used in OCE-ifs simulation is the IFS parametrization described in the ECMWF documentation (ECMWF, 2020) and available in the SBC code section of NEMO. This reference was also added in the paper.

— ln. 261-263, the SST L3 you are using is missing the reference : could you add it ? I think you are using SST daily at night-time and not SST daily average observation : is it ?

SST L3 product we use comes also from the CMEMS website (<http://marine.copernicus.eu>). It corresponds to the multisensor merged, 0.02° and daily average product. The explicit product code and reference document (Orain et al., 2021) have been added in the article.

## Références

- Brassington, G., Martin, M., Tolman, H., Akella, S., Balmeseda, M., Chambers, C., Chassignet, E., Cummings, J., Drillet, Y., Jansen, P., Laloyaux, P., Lea, D., Mehra, A., Mirouze, I., Ritchie, H., Samson, G., Sandery, P., Smith, G., Suarez, M., and Todling, R. (2015). Progress and challenges in short- to medium-range coupled prediction. *Journal of Operational Oceanography*, 8(sup2) :s239–s258.
- Crocker, R., Maksymczuk, J., Mittermaier, M., Tonani, M., and Pequignet, C. (2020). An approach to the verification of high-resolution ocean models using spatial methods. *Ocean Science*, 16(4) :831–845.
- Davies, H. C. (1976). A lateral boundary formulation for multi-level prediction models.
- ECMWF (2020). IFS documentation cy47r1.
- Kendon, M., McCarthy, M., Jevrejeva, S., Matthews, A., and Legg, T. (2019). State of the uk climate 2018. *International Journal of Climatology*, 39(S1) :1–55.
- Lebeaupin Brossier, C., Léger, F., Giordani, H., Beuvier, J., Bouin, M., Ducrocq, V., and Fourrié, N. (2017). Dense water formation in the north-western Mediterranean area during HyMeX-SOP2 in 1/36° ocean simulations : Ocean-atmosphere coupling impact. *Journal of Geophysical Research : Oceans*, 122(7) :5749–5773.

- Ličer, M., Smerkol, P., Fettich, A., Ravdas, M., Papapostolou, A., Mantziafou, A., Strajnar, B., Cedilnik, J., Jeromel, M., Jerman, J., Petan, S., Malačič, V., and Sofianos, S. (2016). Modeling the ocean and atmosphere during an extreme bora event in northern adriatic using one-way and two-way atmosphere–ocean coupling. *Ocean Science*, 12(1) :71–86.
- Orain, F., Roquet, H., and Saux Picart, E. (2021). European near real time level 3s sea surface temperature product sst\_eur\_l3s\_nrt\_observations\_010\_009\_a, quality information document #1.6. Technical report, Copernicus Marine Environment Monitoring Service.
- Pellerin, P., Ritchie, H., Saucier, F. J., Roy, F., Desjardins, S., Valin, M., and Lee, V. (2004). Impact of a two-way coupling between an atmospheric and an ocean-ice model over the gulf of st. lawrence. *Monthly Weather Review*, 132(6) :1379 – 1398.
- Pullen, J., Allard, R., Seo, H., Miller, A. J., Chen, S., Pezzi, L. P., Smith, T., Chu, P., Alves, J., and Caldeira, R. (2017). Coupled ocean-atmosphere forecasting at short and medium time scales. *J. Mar. Res.*, 75(6) :877–921.
- Rainaud, R., Lebeaupin Brossier, C., Ducrocq, V., and Giordani, H. (2017). High-resolution air-sea coupling impact on two heavy precipitation events in the Western Mediterranean : Air-Sea Coupling Impact on Two Mediterranean HPEs. *Quarterly Journal of the Royal Meteorological Society*, 143(707) :2448–2462.
- Renault, L., Lemarié, F., and Arsouze, T. (2019). On the implementation and consequences of the oceanic currents feedback in ocean–atmosphere coupled models. *Ocean Modelling*, 141 :101423.
- Rossa, A., Nurmi, P., and Ebert, E. (2008). *Overview of methods for the verification of quantitative precipitation forecasts*, pages 419–452. Springer Berlin Heidelberg, Berlin, Heidelberg.
- Sauvage, C., Lebeaupin Brossier, C., and Bouin, M.-N. (2021). Towards kilometer-scale ocean–atmosphere–wave coupled forecast : a case study on a mediterranean heavy precipitation event. *Atmospheric Chemistry and Physics*, 21(15) :11857–11887.
- Sotillo, M. G., Cailleau, S., Lorente, P., Levier, B., Aznar, R., Reffray, G., Amo-Baladron, A., Chanut, J., Benkiran, M., and Alvarez-Fanjul, E. (2015). The myocean ibi ocean forecast and reanalysis systems : operational products and roadmap to the future copernicus service. *Journal of Operational Oceanography*, 8(1) :63–79.
- Sotillo, M. G., Levier, B., Lorente, P., Guihou, K., Aznar, R., Amo, A., Aouf, L., and Ghantous, M. (2021). Quality information document for atlantic -iberian biscay irish-ocean physics analysis and forecasting product (cmems-ibi-quid-005-001). Technical report, Copernicus Marine Environment Monitoring Service.
- Thompson, B., Sanchez, C., Heng, B. C. P., Kumar, R., Liu, J., Huang, X.-Y., and Tkalich, P. (2021). Development of a metum (v 11.1) and nemo (v 3.6) coupled operational forecast model for the maritime continent – part 1 : Evaluation of ocean forecasts. *Geoscientific Model Development*, 14(2) :1081–1100.
- Vilibić, I., Mihanović, H., Janeković, I., Denamiel, C., Poulain, P.-M., Orlić, M., Dunić, N., Dadić, V., Pasarić, M., Muslim, S., Gerin, R., Matic, F., Šepić, J., Mauri, E., Kokkini, Z., Tudor, M., Kovač, v., and Džoić, T. (2018).

Wintertime dynamics in the coastal northeastern adriatic sea : the nadex 2015 experiment. *Ocean Science*, 14(2) :237-258.

# Development of a forecast-oriented km-resolution ocean-atmosphere coupled system for Western Europe and **sensitivity study evaluation** for a severe weather situation

Joris Pianezze<sup>1,a</sup>, Jonathan Beuvier<sup>1</sup>, Cindy Lebeau-pin Brossier<sup>2</sup>, Guillaume Samson<sup>1</sup>, Ghislain Faure<sup>2</sup>, and Gilles Garric<sup>1</sup>

<sup>1</sup>Mercator Ocean International, Toulouse, France

<sup>2</sup>CNRM, Université de Toulouse, Météo-France, CNRS, Toulouse, France

<sup>a</sup>now at: Laboratoire d'Aérodynamique/Omp, Université de Toulouse, CNRS, UPS, UMR5560, Toulouse, France

**Correspondence:** J. Beuvier ([jonathan.beuvier@mercator-ocean.fr](mailto:jonathan.beuvier@mercator-ocean.fr))

**Abstract.** To improve high-resolution numerical environmental prediction, it is essential to represent ocean-atmosphere interactions properly, which is not the case in current operational regional forecasting systems used in Western Europe. The objective of this paper is to present a new forecast-oriented coupled ocean-atmosphere system and its evaluation. This system uses the state-of-the-art numerical models AROME (cy43t2) and NEMO (v3.6) with a horizontal resolution of 2.5 km. The OASIS coupler (OASIS3MCT-4.0), implemented in the SurfEX surface scheme and in NEMO, is used to perform the communications between models. **The evaluation A sensitivity study** of this system is carried out using 7-day simulations from 12 to 19 October 2018, characterised by extreme weather events (storms and heavy precipitation event) in the area of interest. Comparisons with in-situ and L3 satellite observations show that the fully coupled simulation reproduces quantitatively well the spatial and temporal evolution of the sea surface temperature and 10 m wind speed. Sensitivity analysis to OA coupling show that the use of an interactive **and high-resolution SST**, in contrast to actual NWP where SST is persistent **and at low resolution**, modifies the atmospheric circulation and the location of heavy precipitation. When compared to the operational-like ocean forecast, simulated oceanic fields show a large sensitivity to coupling. Forced ocean simulations highlight that this sensitivity is mainly controlled by the change in the atmospheric model used to drive NEMO (AROME vs. **ECMWF**-IFS operational forecast). The oceanic boundary layer depths can vary by more than 40%. This impact is amplified by the interactive coupling and is attributed to positive feedback between sea surface cooling and evaporation.

## Contents

|          |                                              |          |
|----------|----------------------------------------------|----------|
| <b>1</b> | <b>Introduction</b>                          | <b>3</b> |
| <b>2</b> | <b>Description of the new coupled system</b> | <b>4</b> |
|          | 2.1 Oceanic model . . . . .                  | 4        |
| 20       | 2.2 Atmospheric and surface models . . . . . | 6        |
|          | 2.3 Coupling strategy . . . . .              | 7        |



|    |                                                                                                                                      |           |
|----|--------------------------------------------------------------------------------------------------------------------------------------|-----------|
|    | <b>3 Numerical set-up</b>                                                                                                            | <b>8</b>  |
|    | 3.1 Case study : storms and high precipitation (12-19 October 2018)                                                                  | 8         |
|    | 3.2 Experiments                                                                                                                      | 10        |
| 25 | <b>4 <del>Simulation results</del> Forecasts performance and sensitivity to ocean-atmosphere coupling</b>                            | <b>11</b> |
|    | 4.1 <del>Evaluation of the OA-coupled simulation</del> Oceanic forecast                                                              | 11        |
|    | 4.1.1 Sea surface temperature                                                                                                        | 11        |
|    | 4.1.2 Sea surface dynamics, salinity and ocean mixed layer                                                                           | 16        |
|    | 4.2 Atmospheric forecast                                                                                                             | 21        |
| 30 | 4.2.1 Wind                                                                                                                           | 21        |
|    | 4.2.2 Rainfall                                                                                                                       | 23        |
|    | 4.3 <del>Impact of OA coupling on the oceanic forecast</del>                                                                         | 25        |
|    | 4.3.1 <del>Sea surface temperature, salinity, height and currents</del>                                                              | 27        |
|    | 4.3.2 <del>Temperature vertical profiles</del>                                                                                       | 27        |
| 35 | 4.3.3 <del>Oceanic boundary layer depth</del>                                                                                        | 27        |
|    | 4.4 <del>Impact of OA coupling on the atmospheric forecast</del>                                                                     | 27        |
|    | 4.4.1 <del>Wind</del>                                                                                                                | 27        |
|    | 4.4.2 <del>Rainfall</del>                                                                                                            | 27        |
|    | <b>5 Conclusions</b>                                                                                                                 | <b>27</b> |
| 40 | <b>Appendix A: <del>Simulation t</del>Technical environment and High Performance Computing characteristics<del>information</del></b> | <b>30</b> |
|    | Appendix A1: <del>Coupling masks between NEMO and AROME</del>                                                                        | 30        |
|    | Appendix A2: <del>Simulation environment and High Performance Computing characteristics</del>                                        | 30        |

## 1 Introduction

Ocean-atmosphere feedbacks occur over a wide range of spatial and temporal scales. They play a critical role in the evolution of climate (Intergovernmental Panel on Climate Change, 2014) but also in the evolution of smaller spatial and temporal scales phenomena like tropical cyclones (Bender and Ginis, 2000; Smith et al., 2009; Jullien et al., 2014), mid-latitudes storms (Mogensen et al., 2018; Bouin and Lebeaupin Brossier, 2020b), sometimes leading to heavy precipitation events as for instance in the Mediterranean region (Rainaud et al., 2017; Meroni et al., 2018), dense water formation (Carniel et al., 2016; Lebeaupin Brossier et al., 2017), and ocean dynamics in particular in response to strong wind (e.g. Pullen et al., 2006; Small et al., 2012; Renault et al., 2019b; Jullien et al., 2020). It is therefore essential to represent them in numerical models to correctly predict atmosphere and ocean dynamics for climate, environmental or weather applications.

Since the 1960s, global coupled ocean-atmosphere systems are indeed developed and used to investigate the future climate change (e.g. Meehl, 1990; Eyring et al., 2016) and, later on, served for seasonal forecasts (e.g. Stockdale et al., 1998). With the increase of High Performance Computer (HPC) resources (Shukla et al., 2010), many regional coupled research systems have been developed since the 2000s' (e.g. Bao et al., 2000; Chen et al., 2010; Warner et al., 2010; Voldoire et al., 2017) and it is now possible to reach coupled ocean-atmosphere simulation on dedicated regions with an horizontal resolution of only few kilometers for both components (e.g. Pellerin et al., 2004; Small et al., 2011; Grifoll et al., 2016; Ličer et al., 2016; Rainaud et al., 2017; Pianezze et al., 2018; Vilibić et al., 2018; Lewis et al., 2019; Thompson et al., 2021). At that resolution, (i) atmospheric model represents explicitly the deep convection, the major gravity waves and the main interactions with orography (Weusthoff et al., 2010) and (ii) oceanic model is classified as eddy-rich resolution solving major baroclinic oceanic eddies (Hewitt et al., 2020).

Among these new kilometric ocean-atmosphere coupled systems, only few aim to operational oceanography purposes or Numerical Weather Prediction (NWP) applications, and even less are run operationally despite spread motivations and common interests (Brassington et al., 2015; Pullen et al., 2017). The main obstacles to this remain in particular the computing costs of an atmospheric model for operational oceanography, and, in general, a lower expertise on one or the other of the components and the absence of coupled initialisation strategy and dedicated validation tools.

To step forward, Météo-France and Mercator Ocean International (MOI) recently join their development efforts to build a new forecast-oriented coupled system based on two models used for operational purposes, which is presented in this paper. This new coupled system is an extension and update of the ocean-atmosphere coupled system developed by Rainaud et al. (2017) and Lebeaupin Brossier et al. (2017), that involves the regional non-hydrostatic NWP system of Météo-France, AROME, and, NEMO, the ocean model operated routinely by MOI for ocean forecasting. This new configuration covers Western Europe and the western part of North-Africa and includes the Western Mediterranean Sea (up to Sicily eastwards) and also part of the North-East Atlantic Ocean, the English Channel and the North and Irish Seas (Fig. 1). This region is characterised by fine-scale ocean structures: estuaries and regions of freshwater influence related to large river plums (e.g. Simpson et al., 1993; Brenon and Le Hir, 1999; Estournel et al., 2001; Bergeron, 2004); thermal fronts notably in the French Atlantic continental shelf area (Yelekçi et al., 2017) and in particular the Ushant front of tidal origin (Chevallier et al., 2014; Redelsperger et al.,

2019), or also, the North Balearic Front in the Western Mediterranean Sea (García et al., 1994); slope current, wind-driven circulation and mesoscale eddies in the Bay of Biscay (van Aken, 2002; Le Boyer et al., 2013); gyres in the Alboran Sea (Viúdez et al., 1998); meanders of the Algerian Current and eddies (Millot et al., 1990; Millot and Taupier-Letage, 2005);  
80 shelf circulation, cyclonic gyre, ocean deep convective area and Northern Current in the Gulf of Lions (e.g. Millot, 1991; Echevin et al., 2003; Testor et al., 2018; Carret et al., 2019). Furthermore, it is also frequently affected by several kinds of natural hazards of weather origin: strong wind related to storm, cyclogenesis (Trigo et al., 2002; Trigo, 2006) with for some cases an explosive development (Liberato et al., 2013) or even tropical-like characteristics (namely medicanes, Miglietta and Rotunno, 2019), sometimes interacting locally with the coast and/or orography (like mistral and tramontane, Bastin et al.,  
85 2006; Obermann et al., 2018); thunderstorms (Taszarek et al., 2019) including Mediterranean heavy precipitation events with floods (Ducrocq et al., 2016); heat waves (De Bono et al., 2004; Darmaraki et al., 2019; Ma et al., 2020); on which ocean-atmosphere interactions play a significant role. Better representing the air-sea feedback that occurs at fine-scale in this area is therefore relevant and developing a dedicated ocean-atmosphere coupled prediction system appears now essential to improve the high-resolution regional forecasts on both sides.

90 In that way, our common scientific objectives in this development between Météo-France and MOI are (1) to share and improve knowledge about fine-scale ocean-atmosphere interactions in this wider region, (2) to be able to provide high-resolution and consistent atmosphere and ocean forecasts over Western Europe and notably the entire French coastal area, including the Corsican coasts, and (3) to prepare a coupled initialisation strategy also able to ensure the consistency with the large-scale driver models used at the boundaries.

95 The new coupled system and the coupling strategy are presented in Section 2. Sections 3 and 4 present **respectively** the experimental design and the **evaluation of this new-coupled system and forced simulations results**, as the coupling impacts for both atmospheric and oceanic forecasts. Finally, conclusions and perspectives are given in Section 5.

## 2 Description of the new coupled system

100 In this section the models and the coupling strategy used in this new coupled system are presented. **The simulation domain is presented in Figure 1, with comparison to the actual operational regional domains for both AROME(-France) and NEMO(-NEATL36). The atmospheric and oceanic domains follow different projections inherited from the 'best' options for each of the two models, and it thus induces a specific treatment of the masked areas that is described in section 2.3.**

### 2.1 Oceanic model

105 The oceanic model used in this coupled system is based on the version 3.6 of the Nucleus for European Modelling of the Ocean model (NEMO, Madec et al., 2017). It is a state-of-the-art primitive-equation, split-explicit, free-surface oceanic model. It has been built from the operational **Iberia-Biscay-Ireland (IBI)** configuration (**originally on the NEATL36 grid**, Maraldi et al., 2013; Sotillo et al., 2015; Gutknecht et al., 2019; Sotillo et al., 2021), spatially extended **eastwards** in the Mediterranean Sea (see **the eNEATL36 grid in Figure 1**). The **meridional** boundary in the IBI operational configuration **located** between the

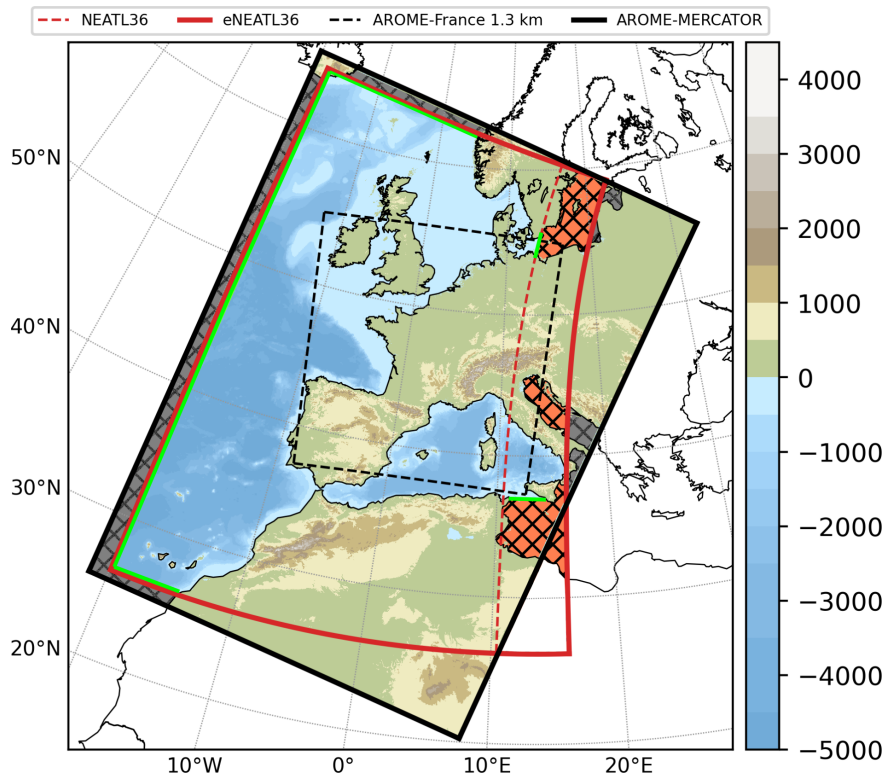

**Figure 1.** Simulation domain illustrated by the bathymetry [m] in NEMO (in blue) and by the orography [m] of the AROME model (in green-brown colors). The lines indicate the **extension boundaries** of the NEMO-eNEATL36 configuration (red) and of the AROME-Mercator domain (black); **the green lines highlight the open boundaries in the oceanic model**. For AROME-Mercator, the grey and orange marine zones are always uncoupled (constant initial SST and null current are used, see text). **For eNEATL36, the orange marine zones are not solved in the regional oceanic simulations**. The dashed lines indicate the boundaries of the actual operational configurations of AROME (AROME-France, 1.3 km-resolution, in black) and NEMO over the Iberia-Biscay-Ireland (IBI) region (NEATL36, 1/36°-resolution, in red).

Gulf of Genoa, Corsica, Sardinia and Tunisia, has been moved to a zonal boundary between Tunisia and Sicily; thus this new regional configuration now covers the entire Tyrrhenian Sea. The horizontal resolution is  $1/36^\circ$  with  $1294 \times 1894$  horizontal grid points and the vertical grid contains 50 stretched z-levels. The vertical level thickness is 0.5 m at surface and around 450 m for the last levels (i.e. at 5700 m depth).

Temporal scheme for both tracer and momentum is a leapfrog scheme associated to Robert-Asselin filter to prevent model instabilities (Leclair and Madec, 2009). The free surface is explicit with time splitting, with a baroclinic time step of 150 s and a barotropic time step 30 times smaller. Momentum advection is computed based on the vector invariant form while the Total Variation Diminishing (TVD) scheme is used for tracer advection in order to conserve energy and enstrophy (Barnier et al., 2006). The Generic Length Scale (GLS) scheme is used in that configuration which is based on two prognostic equations: one for the turbulent kinetic energy, and another for the generic length scale (Umlauf and Burchard, 2003, 2005). Open boundaries

conditions (OBC) are based on the 2D characteristic method (Blayo and Debreu, 2005). The atmospheric pressure component  
120 is added hypothesizing pure isostatic response at open boundaries (inverse barometer approximation). **As in the operational  
IBI configuration (Sotillo et al., 2015, 2021), rivers freshwater inputs are imposed part as daily OBC in the domain locations  
for 33 main rivers and part as a climatological coastal runoff to close the water budget from land. For the 33 main rivers  
explicitly considered, flow-rate data are based on a combination of daily observations, simulated data (from SMHI E-HYPE  
hydrological model) and climatology (monthly climatological data from GRDC and French “Banque Hydro” dataset).** The  
125 tidal forcing is prescribed from the FES2014 dataset (Carrere et al., 2015) and applied as unstructured boundary in the NEMO  
domain.; 11 tidal harmonics (M2, S2, N2, K1, O1, Q1, M4, K2, P1, Mf, Mm) are used. Solar penetration is parameterized  
according to a five-bands exponential scheme (considering the UV radiations) function of surface chlorophyll concentrations,  
using a monthly climatological version of the **Copernicus Marine Environment Monitoring Service (or Copernicus Marine  
Service) (CMEMS) European Space Agency Climate Change Initiative (ESA-CCI) product covering the North East Atlantic  
130 area (OCEANCOLOUR\_ATL\_CHL\_L4\_REP\_OBSERVATIONS\_009\_091, Colella et al., 2020).**

In that new configuration, version 2.0 of the eXtensible Markup Language XML Input/Output Server (XIOS, Meurdesoif,  
2013) is used to manage NEMO output files.

The model is initialised by fields from the operational IBI configuration at  $1/36^\circ$  (IBI36, Sotillo et al., 2021) on the common  
domain (see Figure 1) and from the global CMEMS configuration at  $1/12^\circ$  (GLO12, Lellouche et al., 2018) in the Tyrrhenian  
135 Sea, and forced at the OBC (**green lines in Figure 1**) with daily analyses from this CMEMS GLO12 configuration.

## 2.2 Atmospheric and surface models

The atmospheric model used in this new coupled system is the cycle 43 (cy43t2) of the non-hydrostatic Application de la  
Recherche à l’Opérationnel à Méso-Échelle (AROME) NWP regional model (Seity et al., 2011; Brousseau et al., 2016). The  
AROME physical configuration used here is close to the one operationally used at Météo-France but covers a wider area [than  
140 the AROME-France NWP 1.3 km-resolution model] around Western Europe (Fig. 1), with a 2.5 km-resolution and is run  
here without data assimilation. **This AROME domain, with a Lambert conformal projection, has been specifically defined and  
oriented in order to cover the eNEATL36 domain, but with a slightly wider extent notably to avoid some spurious atmospheric  
boundary effects to affect the ocean component.**

In more details, AROME has  $1285 \times 1789$  horizontal grid points and a vertical grid of 90 hybrid  $\eta$ -levels with a first-level  
145 thickness of almost 5 m. The advection scheme in AROME is semi-Lagrangian and the temporal scheme is semi-implicit with  
a time-step of 50 s. The 1.5-order turbulent kinetic energy scheme from Cuxart et al. (2000) is used. **The surface current acts in  
two ways on turbulence by using the relative winds, i.e., the difference between the near-surface winds and the surface oceanic  
currents, instead of absolute winds (i) in the computation of air-sea fluxes and (ii) in the tri-diagonal problem associated  
with the discretization of the vertical turbulent viscosity because of the implicit treatment of the bottom boundary condition  
150 in the atmospheric model. Only the first effect was included in the former AROME-NEMO couplings (Rainaud et al., 2017;  
Lebeaupin Brossier et al., 2017; Sauvage et al., 2021).** For the purpose of this study, the full Current-FeedBack effect (CFB)

has been added in the turbulent scheme of AROME, following Renault et al. (2019a) and based on the exact same developments as previously done in the MESO-NH model (Bouin and Lebeaupin Brossier, 2020a).

Thanks to its 2.5 km horizontal resolution the deep convection is explicitly resolved while the shallow convection is parameterized with the Eddy Diffusion Kain Fritsch EDKF, (EDKF, Kain and Fritsch, 1990) scheme. The ICE3 one-moment microphysical scheme of Pinty and Jabouille (1998) is used to compute the evolution of five hydrometeor species (rain, snow, graupel, cloud ice and cloud liquid water). Radiative transfer is based on Fouquart and Bonnel (1980) scheme for short-wave radiation and the Rapid Radiative Transfer Model (RRTM, Mlawer et al., 1997) for long-wave radiation.

The surface exchanges are computed by the SURFace EXternalisé (SURFEX) surface model (Masson et al., 2013) considering four different surface types: land, towns, sea and inland waters (lakes and rivers). Output fluxes are weight-averaged inside each grid box according to the fraction of each respective tile, before being provided to the atmospheric model at every time step. Exchanges over land are computed using the ISBA (Interactions between Soil, Biosphere and Atmosphere) parametrization (Noilhan and Planton, 1989). The formulation from Charnock (1955) is used for inland waters, whereas the Town Energy Balance (TEB) scheme is activated over urban surfaces (Masson, 2000). For the sea surface, the albedo is computed following the Taylor et al. (1996) scheme and sea surface fluxes are computed with COARE3.0 parametrization (Fairall et al., 2003).

Like when run operationally, AROME in this configuration can be initialised and forced at its lateral boundaries by operational global analyses and/or forecasts from Action de Recherche Petite Echelle Grande Echelle (ARPEGE ; Courtier et al. (1991)) or Integrated Forecasting System (IFS ; ECMWF (2020)). No lateral **boundary** condition is applied on SurfEx which is initialized over continental surfaces with the ARPEGE surface analysis.

### 170 2.3 Coupling strategy

Communications between AROME/SurfEx and NEMO models are performed with the Ocean-Atmosphere-Sea-Ice-Soil coupler (OASIS3-MCT\_4.0, Valcke, 2013; Craig et al., 2017). OASIS3-MCT is a library allowing synchronised exchanges of coupling information between different numerical models. OASIS calls were inserted in SurfEx sources by Voltaire et al. (2017) allowing the atmosphere-ocean coupling between AROME/SurfEx and NEMO.

175 ~~A similar coupling algorithm as is used in this study and is only summarised here and in Table for clarity. During the coupled simulation,~~ AROME-SurfEx sends to NEMO the net non-solar heat flux, the two components of the wind stress and the net freshwater flux computed for the sea tile only, which are then imposed at the surface boundary condition of NEMO (Tab. 1). The solar heat flux is also send to NEMO and is used to calculate the penetrative radiation in the ocean. Contrary to Rainaud et al. (2017), Lebeaupin Brossier et al. (2017), but also Arnold et al. (2020), the possibility of exchanging atmospheric surface pressure was implemented in this study and is also exchanged interactively during the coupled simulations for the inverse barometer approximation. In return, NEMO sends to AROME-SurfEx, the sea surface temperature and the sea surface current components that then enter in the sea surface turbulent fluxes computation and in the atmospheric turbulence scheme.

The remapping files needed to interpolate fields between NEMO and AROME-SurfEx with a distance weighted nearest-neighbour interpolation method using four neighbours are created offline using OASIS tools. ~~Figure 1 presents the masked parts of each domain. The orange areas in Figure 1 correspond to areas where the regional NEMO-eNEATL36 does not~~



190 resolve the ocean (ocean in these areas is resolved in the global GLO12 configuration which gives information through the open boundaries, highlighted in green in Fig. 1). In AROME, the masked area corresponds to the same unsolved areas of the regional NEMO configuration plus the northern, western and southern extensions. Where the ocean is masked because outside the regional NEMO domain (orange and grey hashed areas in Fig. 1), AROME uses a SST constant in time and equal to the one used at the initial time, and the surface currents taken are always equal to zero (see also Appendix ??).

**Table 1.** Variables exchanged between NEMO (O) and AROME/SurfEx (A) via the OASIS3-MCT coupler.

| Variable           | Description                     |                   | Units              |
|--------------------|---------------------------------|-------------------|--------------------|
| $Q_{ns}$           | Non solar heat flux             | A $\rightarrow$ O | $W.m^{-2}$         |
| $Q_{sr}$           | Solar heat flux                 | A $\rightarrow$ O | $W.m^{-2}$         |
| $\tau_{x,y}$       | Momentum flux                   | A $\rightarrow$ O | $N.m^{-2}$         |
| E-P                | Evaporation minus precipitation | A $\rightarrow$ O | $kg.m^{-2}.s^{-1}$ |
| $P_{atm}$          | Atmospheric surface pressure    | A $\rightarrow$ O | Pa                 |
| SST                | Sea surface temperature         | O $\rightarrow$ A | K                  |
| $u_{cur}, v_{cur}$ | Sea surface currents            | O $\rightarrow$ A | $m.s^{-1}$         |

### 3 Numerical set-up

#### 3.1 Case study : storms and high precipitation (12-19 October 2018)

The **evaluation sensitivity** of this coupled system is carried out through 7-day simulations of a case study from 12 to 19 October 2018. During these seven days, Western Europe experienced a severe weather sequence (see Fig. 2) with a mid-latitude storm (Callum), two [ex-]tropical cyclones (Leslie and Michael) and a Mediterranean heavy precipitating event (Aude HPE case).  
205

In more details, storm Callum was named by Met Éireann on 10 October when it was forecast to affect the British Islands and more particularly Ireland and Wales. The storm deepened over the Atlantic Ocean on 11 October, reaching a minimum pressure depth of 938 hPa. On 12 October, strong wind affected Ireland and the north-western Wales, with gust up to 140 km/h at Capet Curig. Heavy rainfall also occurred over Wales (Fig. 2b), in particular inland due to an orographic enhancement, with up to 219 mm in 36 hours recorded at Libanus (Powys) making Callum one of the most severe rainfall events across Wales in the last 50 years (Kendon et al., 2019). Storm Callum had indeed strong impacts due to flooding, also because the wind peak coincided with high spring tides and led to large waves, with some coastal flooding, largely enhanced by the heavy rainfall.

Hurricane Leslie was a large, long-lived, and very erratic tropical cyclone over Atlantic. Followed by the National Hurricane Center (NHC) since 23 September (Pasch and Roberts, 2019), it stroke the Iberian Peninsula on the evening of 13 October. For the first time on record, a Tropical Storm Warning was issued for Madeira Island. In fact, after a stationary position in the Eastern Atlantic at the beginning of October, Leslie started moving and intensifying under favourable environment with slightly warmer water, so it re-attained the hurricane status on 10 October. Leslie reached its peak intensity with maximum sustained  
205

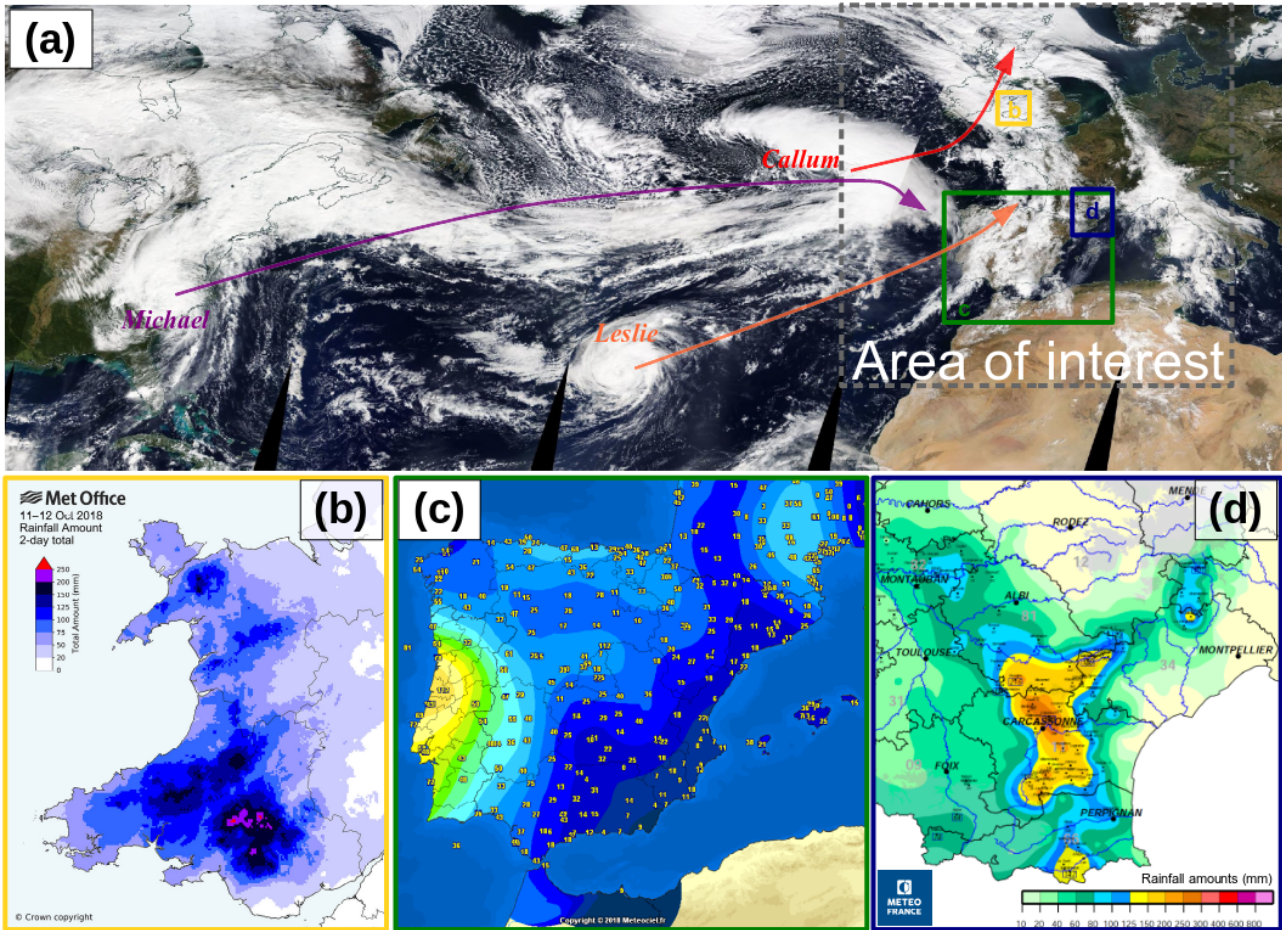

**Figure 2.** Illustrations of the case study: (a) True color image of Terra/MODIS (source: <https://worldview.earthdata.nasa.gov/>) on 11 October 2018 over the North Atlantic Ocean showing the storm Callum and the Leslie and Michael hurricanes (arrows depict their trajectories towards the area of interest); (b) Rainfall totals (mm) from 11 to 12 October 2018 over Wales (Callum’s impacts, Figure 64 from Kendon et al., 2019, source: MetOffice); (c) Wind gust observations (km/h) over Iberian Peninsula on 13 October 2018 around 23 UTC (Leslie’s landfall, source: [www.meteociel.fr](http://www.meteociel.fr)); (d) Rainfall amounts (mm) between 06 UTC on 14 October and 06 UTC on 15 October 2018 over the French Languedoc region (Aude event, source: Météo-France - edited 19/02/2019).

winds of 150 km/h and a minimum central pressure of 968 hPa, on 00 UTC 12 October, about 1000 km south-southwest of the Azores. While then re-weakening, Leslie raced east-northeastwards, accelerated by the mid-latitudes westerlies, and passed about 320 km North-Northwest of the Madeira Island on 06 UTC, 13 October. At 18 UTC, Leslie became a strong extratropical cyclone, at about 190 km West-Northwest of Lisbon. Leslie’s extratropical remnant made finally landfall close to Figueira da Foz (Coimbra District) just after 21 UTC with wind gusts above 110 km/h (Fig. 2c), heavy rains and strong waves. Spain was also affected by strong wind with up to 96 km/h in Zamora (Castile and Leòn). Leslie cyclone’s centre became ill-defined after

it moved over the Bay of Biscay on 14 October. At the same time, it induced favourable and steady conditions for heavy rainfall  
215 in the Western Mediterranean, Leslie remnant acting as a large trough generating a southerly flow.

As described in Caumont et al. (2021) and Mandement and Caumont (2020), in the night of 14 to 15 October 2018 the  
Languedoc region in the south of France, was indeed affected by heavy rainfall caused by a regenerative multi-cellular convec-  
220 tive system organised along a convergence line between the moist southerly low-level flow and a quasi-stationary cold front  
over south-western France along a mean sea level pressure (MSLP) trough that linked Leslie to a low located over Ireland over  
south-western France. During the evening and night of 14 to 15 October, a low rapidly deepened around the cold front and  
induced a strong convective activity over the Catalan Sea, between the Balearic Islands and Valencia region. The most intense  
rainfall occurred between 19 UTC 14 October and 07 UTC 15 October. The Météo-France quantitative precipitation estimation  
gives a maximum 24 h-accumulated rainfall total of 342 mm close to Trèbes (Aude, Fig. 2d). Intense rainfall mainly occurred  
in less than 12 hours, leading to flash floods in particular in Villegailhenc (Aude), and caused 15 fatalities.

225 Some days after, the extratropical cyclone Michael emerged into the Atlantic around 06 UTC 12 October after passing near  
Norfolk (Virginia, US). Michael re-obtained hurricane-force winds on 13 October in the Atlantic waters south of Nova Scotia  
and Newfoundland, then quickly travelled within westerlies to the North-Eastern Atlantic on 14 October. The cyclone turned  
sharply southeastward and later southward around the northeastern edge of the subtropical ridge, weakening slightly, as it  
approached the Iberian Peninsula. Michael dissipated by 00 UTC on 16 October, while it was located just west of northern  
230 Portugal and just after Leslie's remnant was absorbed into Michael's remnant, following a brief Fujiwhara (1921) interaction.

This 7-day period was chosen as the weather situation encountered is known to foster large air-sea interactions, but also  
because both ocean and weather forecasts may exhibit a larger sensitivity to coupling in such conditions. This is analysed  
through different simulations in the coupled and forced modes that are described in the following Section.

### 3.2 Experiments

235 To evaluate the ocean-atmosphere coupling impact on the atmospheric and oceanic forecasts, four experiments were performed  
and are detailed below and in Table 2.

The OA experiment is the ocean-atmosphere coupled forecast over 7 days, starting on 12 October 2018 00 UTC. The initial  
atmospheric conditions comes from the global IFS analysis of 12 October 2018 00 UTC and the lateral atmospheric forcing  
comes every 6 hours from the global IFS forecast starting on 12 October 2018 00 UTC. The ocean initial fields come from the  
240 combination, as described in 2.1, of the CMEMS IBI and GLO analyses (3D daily fields of the 11 October) and OBC for the  
7 days come from the CMEMS GLO daily analyses. The ocean-atmosphere coupling period is set to 600 s, *i.e.* the fields are  
exchanged every 4 NEMO time-steps and 12 AROME time-steps.

The reference experiment for atmospheric forecast (ARO) is similar to the OA experiment except that, as uncoupled, (i) the  
SST is kept persistent in time and (ii) sea surface currents are not taken into account. Note that this ARO experiment is equiv-  
245 alent to one operational deterministic execution of AROME at Météo-France (called *AROME-IFS*), but with two adaptations.  
First, the lateral atmospheric conditions frequency is changed to 6 hrs in order to be able to run over a 7-day period (against 42  
to 48h for AROME operational forecasts). This was mandatory due to less frequent forecast outputs available for the longest-

term ranges of IFS. And secondly, for consistency with OA, the initial SST field is the combination of the **GLOPSY4** and IBI SST fields (instead of the ARPEGE SST analysis for AROME-IFS). Thus, comparing ARO with OA allows to evaluate the ocean-atmosphere coupling impact, *i.e.* the effect of an interactive evolution of SST and the impact of taking currents into account, on the weather forecast.

Two ocean-only experiments were also run. OCE-ifs is the **standard ocean** simulation close to the operational mode of IBI: ~~;~~*i.e.*~~†~~The initial conditions consist in the combination of the CMEMS IBI and GLO analyses (3D daily fields of the 11 October) and OBC for the 7 days come from the CMEMS GLO daily analyses (similarly to the ocean component of OA). The atmospheric forcing uses the bulk variables from IFS (2 m-air temperature, 2 m-humidity, 10 m-wind components, rainfall, mean sea level pressure, short-wave and long-wave solar fluxes) and the IFS bulk parametrization (ECMWF, 2020) available in the NEMO surface scheme (meaning the SST evolution and sea surface currents are taken into account to compute the air-sea exchanges). OCE-aro is an intermediate simulation using the ARO (AROME) bulk variables as atmospheric forcing (the same bulk variables as for IFS are used except for the wind speed which is taken at 5 m, the height of first vertical level of AROME) and the COARE3.0 sea surface turbulent flux parametrization (Fairall et al., 2003) through SURFEX offline. Comparing OCE-aro with OA on one hand and OCE-aro with OCE-ifs on the other permits to disentangle the ocean-atmosphere coupling effect on the ocean forecast from the impact of the atmospheric forcing change.

**Table 2.** Set of simulations.

| Name of simulation | Type of simulation                                                                 | Forcing/coupling time-step | Fluxes param. |
|--------------------|------------------------------------------------------------------------------------|----------------------------|---------------|
| OA                 | Fully coupled OA                                                                   | 600 s                      | SFX-COARE3.0  |
| ARO                | AROME forced by persistent SST equal at SST <sup>ini</sup> and no oceanic currents | -                          | SFX-COARE3.0  |
| OCE-ifs            | NEMO forced by bulk variables from IFS                                             | 3600 s                     | NEMO-IFS      |
| OCE-aro            | NEMO forced by bulk variables from ARO simulation                                  | 3600 s                     | SFX-COARE3.0  |

## 4 **Simulation results Forecasts performance and sensitivity to ocean-atmosphere coupling**

~~This section presents an evaluation of the coupled OA simulation (Section ??) and the respective impacts of the high-resolution interactive~~

### 265 4.1 **Evaluation of the OA coupled simulation Oceanic forecast**

~~This section describes the OA coupled simulation and presents its evaluation in comparison with observations available at the sea surface~~

This section presents the evaluation of the coupled OA simulation for ocean surface and upper-layer parameters and the impacts of both the high-resolution atmospheric forcing and ocean-atmosphere coupling on the oceanic forecasts.

#### 4.1.1 **Sea surface temperature**

270 At the initial state of OA (as for all the simulations), a latitudinal SST gradient is visible, from 7°C in the northwest to more than 24°C in the southwest part of the domain and in the Mediterranean sea (Fig. 3a). Small-scale structures in SST are also visible

and are related to the presence of mesoscale oceanic eddies, resolved at that  $1/36^\circ$  horizontal resolution (or partly resolved in the Mediterranean part). After 1 (Fig. 3b) and 3 (Fig. 3c) simulated days, the signatures of Callum, Leslie and Mickael storms are visible with an associated sea surface cooling of up to  $2.5^\circ\text{C}$  persisting during the 7 simulated days (Fig. 3d). This cooling is mainly due to oceanic vertical mixing processes enhanced by the strong wind produced by these storms. At the end of the 7 simulated days, the average temperature over the domain is  $0.6^\circ\text{C}$  colder than initially with local differences varying up to 35% of the initial SST (cooler or warmer depending of the location). The maximum differences are located in the areas of influence of the storms (Atlantic ocean).

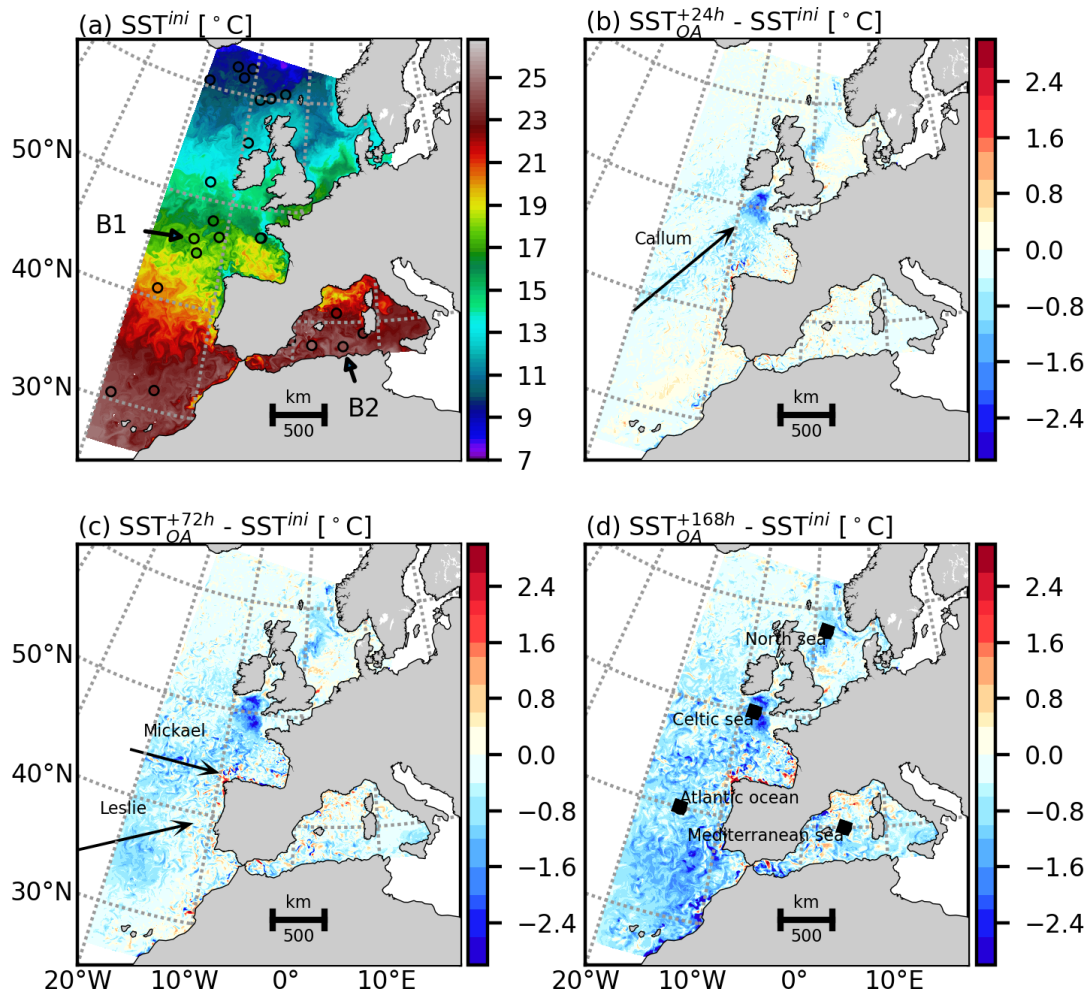

**Figure 3.** Initial [12 Oct. 2018 00 UTC] (a) and evolution of the SST ( $^\circ\text{C}$ ) after 1 day (b), 3 days (c) and 7 days (d) in the coupled simulation (OA; Table 2). In (a), the colour circles represent the SST measured by drifting buoys at that time ; B1 and B2 labels indicate the location of the two drifting buoys used in Figure 5. Black squares in (d) correspond to four extracted areas used for analyse in the next subsections.



In Figure 4 and Table 3, the simulated sea surface temperature after 168 hours (7 days) for all simulations (Tab. 2) is compared to satellite observations coming from the Copernicus Marine Service CMEMS portal (SST\_EUR\_L3S\_NRT\_OBSERVATIONS\_010\_009\_a, Orain et al., 2021). This L3 SST is obtained from several satellite sensors which are combined together and interpolated on a regular  $0.02^\circ$  grid, and is available every day with daily average. In order to be able to compare the simulated and observed SST fields, it is necessary to interpolate the simulated SST on the satellite observation grid taking into account the masked areas related to the presence of clouds and therefore where no satellite data is available (white areas in Fig. 4a,b,c,d). Whether at the beginning or at the end of the simulation, the simulated SST values are close to the observed SST with a mean bias of less than  $\pm 0.4^\circ\text{C}$ . The maximum differences are present in the ARO simulation where the SST is persistent (the case in AROME operational configuration used at Météo-France) (Fig. 4a). Its average is about  $+0.38^\circ\text{C}$  over the whole domain and varies from  $-4.28^\circ\text{C}$  to  $+5.25^\circ\text{C}$  locally. Unlike the ARO simulation, the other simulated temperatures have a lower average negative bias below  $-0.1^\circ\text{C}$  (Fig. 4b,c,d). Among these three simulations, the SST simulated by the OA (Fig. 4b) and OCE-aro (Fig. 4c) simulations are very close with biases equal to  $-0.1^\circ\text{C}$  and  $-0.06^\circ\text{C}$  respectively and values varying locally by about  $\pm 4.3^\circ\text{C}$ . We can note that the intense cooling located in the Celtic Sea already identified in Fig. 3 is stronger than the observed one (Fig. 4b,c). This cooling related to the Calum passage persists throughout the coupled OA and OCE-aro simulations but not in the OCE-ifs simulation which has a more important restratification (Fig. 4d). In the rest of the paper, we will show that this cooling is attributed to the simulated AROME surface winds (used to compute the surface turbulent fluxes in the OA and OCE-aro simulations) which are stronger than the surface winds simulated by IFS (used to compute the surface turbulent fluxes in the OCE-ifs simulation) inducing more intense oceanic mixing in OA and OCE-aro simulations than in OCE-ifs one. The SST closest to the observations is the SST simulated by the OCE-ifs simulation, which has an average bias of  $-0.01^\circ\text{C}$  varying from  $-3.47$  to  $+4.14$  locally. Differences can be noted in the position of oceanic structures, which leads to local differences in SST that can vary by up to  $\pm 4^\circ\text{C}$ . In addition

**Table 3.** Minimum, maximum and mean SST bias [ $^\circ\text{C}$ ] values against L3 SST observations at the end of the simulated period (19 October 2018 00 UTC, i.e. +168h) for each experiment (Note that ARO SST is constant since 12 October 2018 00 UTC). This table is complementary to Figure 4.

| bias [ $^\circ\text{C}$ ] | ARO   | OA    | OCE-aro | OCE-ifs |
|---------------------------|-------|-------|---------|---------|
| min                       | -4.28 | -4.26 | -4.15   | -3.47   |
| max                       | 5.25  | 4.27  | 4.55    | 4.14    |
| mean                      | 0.38  | -0.10 | -0.06   | -0.01   |

Temporal evolution of simulated sea surface temperature is also compared to in-situ observations (drifting buoys) available on the Coriolis project portal (<http://www.coriolis.eu.org>) in Figure 5 (the locations of the observations used for the evaluation are shown in Figure 3a). Among the full observational data-set, we select only data which have almost fully time series during the 7 simulated days (33 drifting buoys), and with a hourly period (see B1 and B2 examples in Fig. 5a,b). Despite this selection, the high density of drifting buoys observation allows to evaluate the simulated SST over the entire domain. For all the buoys



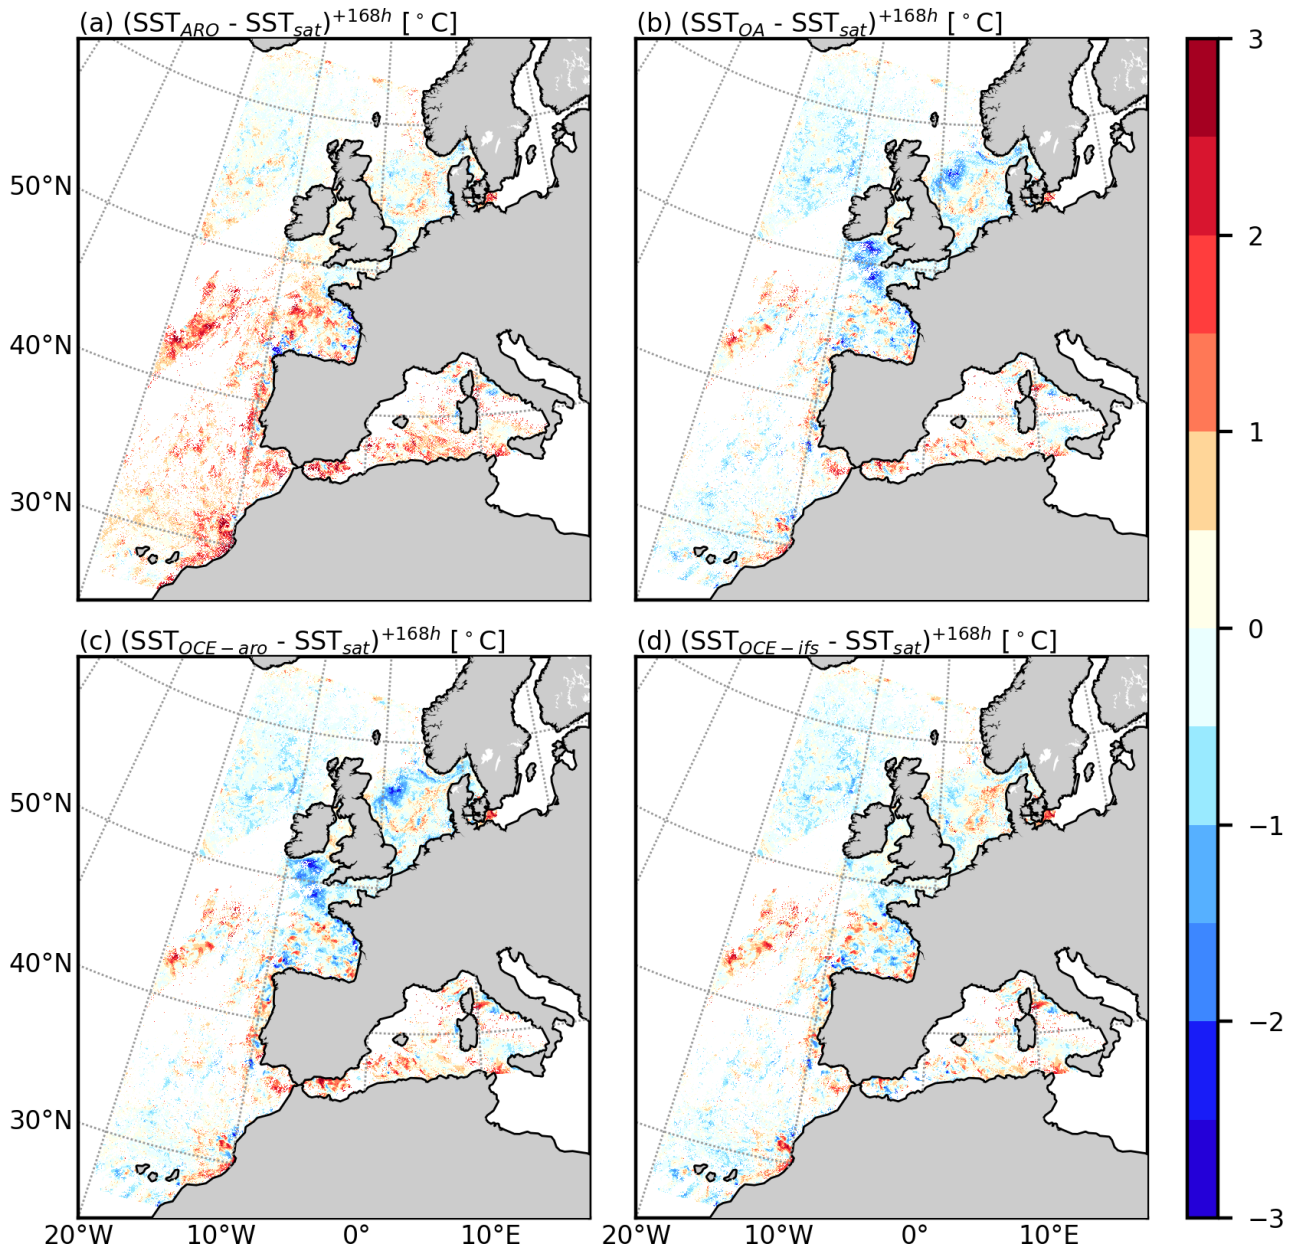

**Figure 4.** Comparison with L3 satellite SST observations at the end of the simulation (19 October 2018 00 UTC) : differences (in °C) with (a) ARO SST, (b) OA simulated SST, (c) OCE-aro simulated SST and (d) OCE-ifs simulated SST.

represented in Figure 3a, statistics **of the OA for all the experiments (Tab. 2)** are computed and are summarised in the Taylor Diagram in Figure 5c. **The SST simulated by the ARO simulation is the furthest from the observations, with a deviation from the observed SST that increases during the simulation (Figure 5a and b) and a mean bias around 0.4°C (Fig. 5c).** This important

bias is clearly visible in Figure 5a and b. For  $\Theta$ Aother simulations (OA, OCE-aro and OCE-ifs ; Tab. 2), the mean bias are quite similar and is around  $0.04^{\circ}\text{C}$  and the standard deviation is  $0.2^{\circ}\text{C}$ , but scores show a large variability. The correlation is 0.4 on average. The examples of B1 and B2 illustrate the good behaviour of  $\Theta$ Aall simulations in representing the weekly surface cooling. The rapid and intense SST variations are also reproduced, as visible for B1 (Fig. 5a), related to the storm Callum, or for the diurnal cycle seen at B2 (Fig. 5b), on 12 and 18 October for example in OA, however with differences in terms of intensity with respect to observations. In spite of local differences, the coupled simulation reproduces OA, OCE-aro and OCE-ifs simulations reproduce thus accurately the mean gradient, mesoscale structures and evolution of SST during the 7 simulated days.

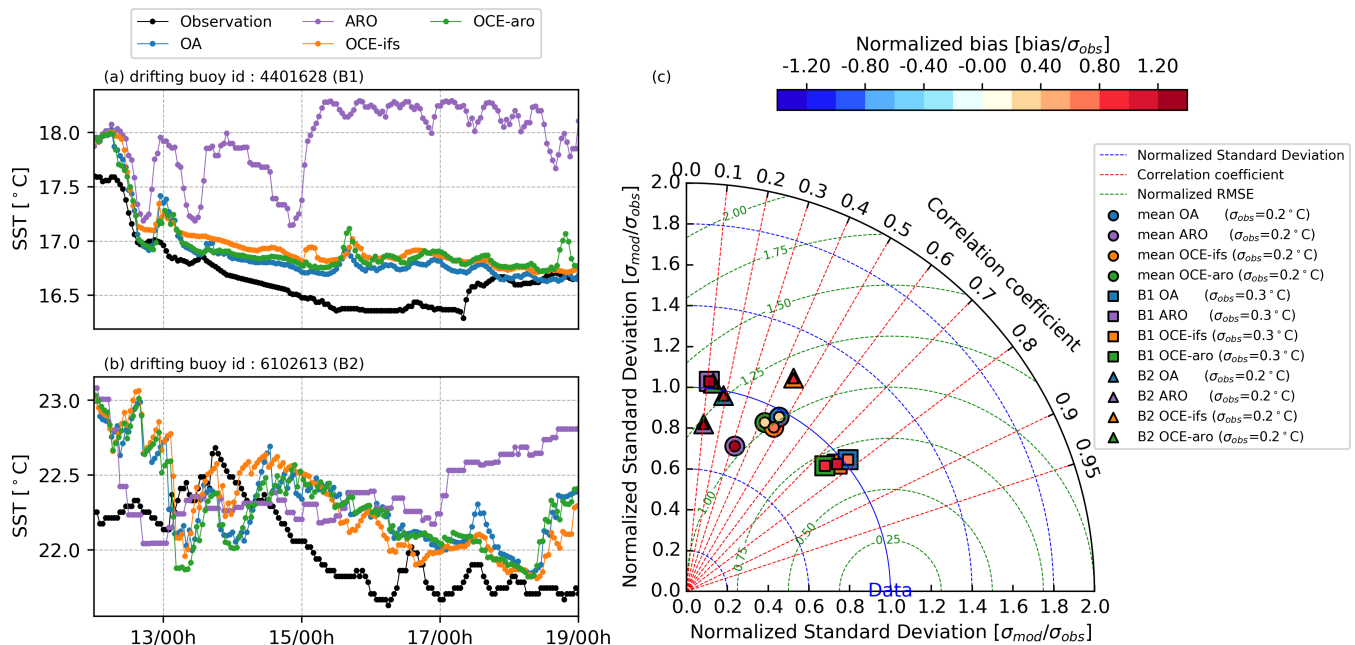

**Figure 5.** Temporal evolution of sea surface temperature observed and simulated at the location of the buoys B1 (a) and B2 (b). (c) Taylor diagram made from comparison with 33 selected buoys visible in Figure 3a. Mean statistics for the 33 selected buoys are represented in circles, statistics for buoy B1 only in squares and for buoy B2 only in triangles. The inner colour indicates the normalised bias. The external colour indicates the experiment: blue for OA, purple for ARO, orange for OCE-ifs and green for OCE-aro.

In order to further evaluate the numerical experiments, we chose to focus on some dedicated locations, where intense air-sea interactions are expected. For that, we define four boxes of  $50\text{ km} \times 50\text{ km}$  and their locations are visible in Figure 3d (black squares).

Temporal evolution of sea surface temperature in these four boxes is presented in Figure 6a,b,c,d. As discussed in the previous paragraph, the simulated SST decreases during the 7 simulated days in OA as in OCE-aro and OCE-ifs, with diurnal variations visible in the Mediterranean sea at the beginning of the simulated period. In the Celtic and North seas, the sea

surface temperature decreases by more than 1.5°C and 0.5°C in less than 1 day, respectively, for OA and OCE-aro simulations.

325 In OCE-ifs (Fig. 6d), no sea surface cooling is visible in North sea and cooling of 0.3°C in 1 day is visible in Celtic sea, 5 times lower than sea surface cooling in OA and OCE-aro simulations (Fig. 6b,c). Changing the atmospheric forcing of NEMO between IFS and AROME drastically modifies the oceanic response, with a more intense sea surface cooling for simulations using AROME (see OA in blue and OCE-aro in green in Fig. 6c,d). Thus, the effect of changing the atmospheric model to force NEMO is larger than the effect of an interactive coupling on the simulated surface fields, in particular for SST and

330 SSS forecast. However, the effect of the ocean-atmosphere coupling on the SST and SSS induces also a feedback, leading to a more important cooling of the surface waters in coupled (OA) than in forced (OCE-aro) simulations. This sea surface cooling enhancement with coupling is in fact related to a lower non-solar net heat flux in OA (not shown), meaning a larger heat loss at night (and a lower diurnal heating) for ocean in OA than in OCE-aro. In fact, the surface cooling rapidly change the atmospheric low-level environment and stability [without significant difference in the wind speed (and wind stress)]. In

335 particular, the coupled simulation represents an amplification loop, as the 2m-specific humidity is progressively lower in OA (than in OCE-aro/ARO). This enhances evaporation, and thus amplify slightly the surface cooling. We can note that this effect of ocean-atmosphere coupling is visible for all boxes after 3 simulated days and differences increase until the end of the simulation (see Fig. 6a,b,c,d). Using a persistent SST for extreme events (ARO simulation) can lead to large errors (more than 0.5°C in 2 days) as it is shown in Fig. 6a,b,c.

#### 340 4.1.2 Sea surface dynamics, salinity and ocean mixed layer

As for the temporal evolution of sea surface temperature, the sea surface salinity (SSS), sea surface height (SSH) and sea surface currents (SSC) are extracted in the four locations (Fig. 3d, black squares) and are presented in Figure 6e to 6p.

In addition to SSS variations due to tide, the SSS time series show a global increase in the Mediterranean, Atlantic Ocean and North Sea (Fig. 6e,f,h). It reaches about +0.04 PSU day<sup>-1</sup> over the 7 simulated days in the Mediterranean and is twice

345 lower for the two others (*i.e.* Atlantic Ocean and North Sea boxes). The strong evaporation fluxes linked to the presence of high winds are responsible for these increases (not shown). Only the Celtic Sea shows a decrease in SSS of -0.15 PSU in the first 36 simulated hours (Fig. 6g). This can be explained by the intense oceanic mixing associated to strong winds, which tends to mix less salty water to the surface, while the precipitation associated with the passage of Callum does not contribute significantly to the decrease of SSS in this area (not shown). The SSS simulated by OA and OCE-aro simulations have similar

350 variabilities and the effect of OA coupling is not visible. However, differences of the order of -0.1 PSU are visible between these two simulations and the OCE-ifs one. This can be explained by different freshwater fluxes (evaporation minus precipitation) between the AROME and IFS simulations.

With respect to SSH variations (Fig. 6i,j,k,l), they are strongest in the Celtic Sea where the tidal amplitude is higher. The amplitude of these variations reaches 4 m and decreases over the 7 days, in relation to the decrease of the tidal coefficient

355 from 95 on the 12<sup>th</sup> to 30 on the 17<sup>th</sup> (values for Brest harbour). In the Atlantic Ocean, the variation of SSH is also important with an amplitude of one meter, while its weaker in the North sea, due to a smaller amplitude of the tidal harmonics in this area, leading also to a more variable signal related to interactions between these harmonics. In the Mediterranean sea, the SSH

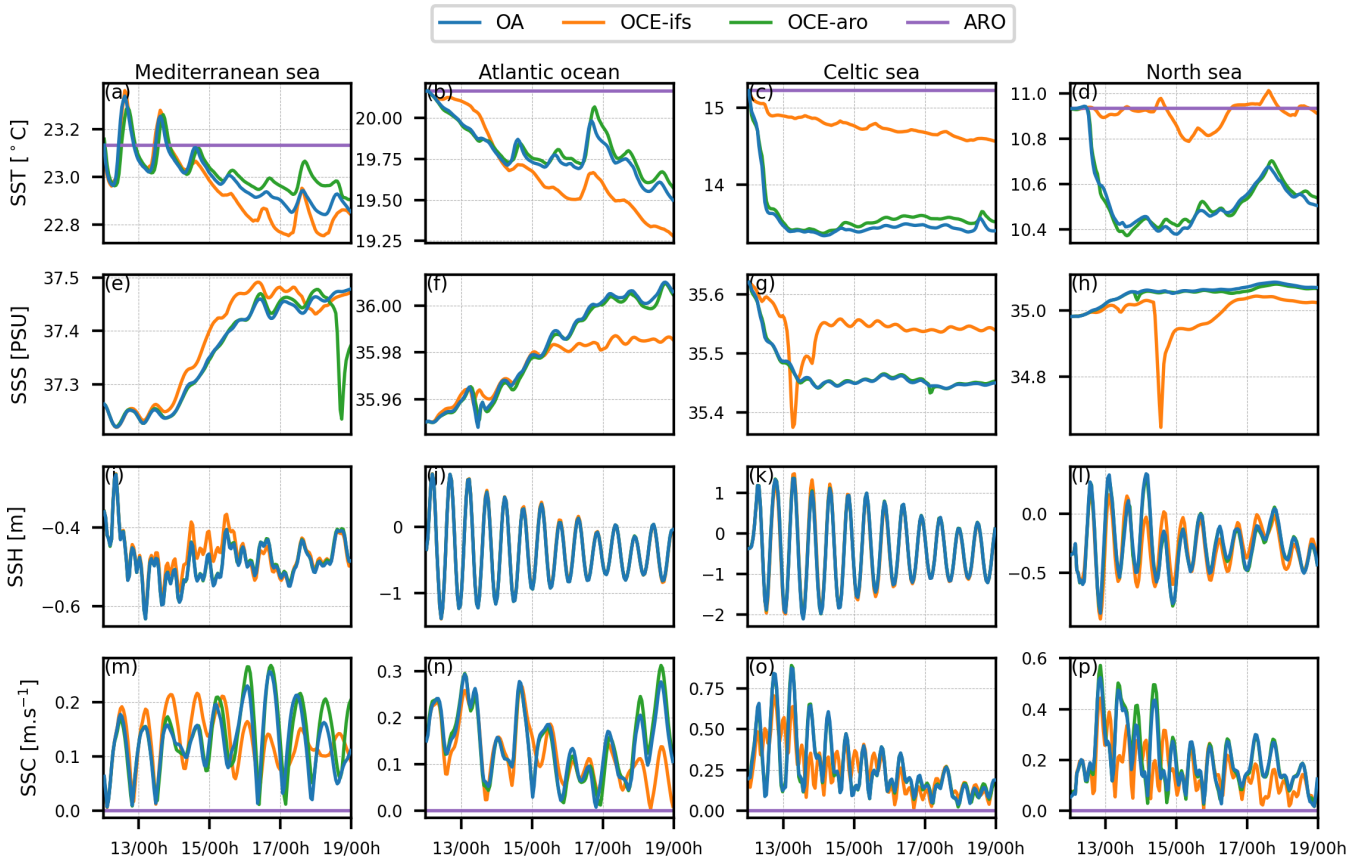

**Figure 6.** Temporal evolution of simulated sea surface temperature (SST, ° C), salinity (SSS, psu), height (SSH, m) and current speed (SSC,  $\text{m s}^{-1}$ ) and of near-surface wind-velocity ( $\text{m s}^{-1}$ ), extracted in the four areas presented in Figure 3d. In (q,r,s,t) ARO wind speed is the same as the OCE-aro one. Since the ARO simulation does not take into account the SSS and SSH, they are not represented. Note that ARO does not have SSS nor SSH.

variations have the smallest amplitude ( $\approx 0.2$  m), which are in fact mainly related to the presence of oceanic eddies. The main signal being due to the tidal oscillations, differences between the 3 simulations are relatively small or even indistinguishable, meaning that the effect of the choice of the atmospheric forcing model or OA coupling on SSH is of an order of magnitude smaller than the tidal forcing.

Figures 6m,n,o,p show the impact of atmospheric forcing on the sea surface currents (SSC) in the four extracted areas. Note that in the coupled experiment (OA ; Tab. 2), the sea surface currents are also exchanged. The spatial and temporal evolution of these currents are important during the 7 simulated days. Their intensity are maximum in the Channel, reaching more than 2  $\text{m s}^{-1}$  locally, due to tidal currents (not shown). Temporal evolution of SSC in the four extracted areas are presented in Fig 6m,n,o,p. SSC are maximum in Celtic and North Seas, reaching more than  $0.5 \text{ m s}^{-1}$  with intensities that vary with respect to the tides. For the Atlantic Ocean and Mediterranean Sea boxes, SSC intensity is less important but can reach up to  $0.25 \text{ m s}^{-1}$ . SSC

are on average less intense in the OCE-ifs simulation than in the OA and OCE-aro simulations, which is explained by weaker winds in IFS than in AROME (Section 4.2). Also, for the Mediterranean box, on 14-15 October, the SSC is stronger in OCE-ifs than in OA and OCE-aro during that period (Fig. 6m). Impact of OA coupling on SSC is not significantly important.

The evolution of the ocean mixed layer is analysed more finely thanks to temporal evolution of temperature vertical profiles (Fig. 7). Black lines in Fig 7 correspond to ocean mixed layer depth (MLD). To compute this mixed layer depth, the potential density field is used: for each grid point, the value at 10m depth is taken as a reference, and the mixed layer depth is obtained when the vertical difference is higher than  $0.01 \text{ kg.m}^{-3}$  (pycnocline depth). At the beginning of the OA, OCE-aro and OCE-ifs simulations (Tab. 2), the MLD is around 40 m in the Atlantic Ocean, the Channel and the North Sea. In the Mediterranean, the MLD is thinner, around 20-30 m, corresponding to typical MLD values for late summer (D'Ortenzio et al., 2005). The MLD is stable in the Mediterranean and deepens slightly in the Atlantic, from 40 m to 50 m during the 7 days simulated for all simulations. At these locations, differences between the simulations are also quite small (Fig. 7b,c,e,f) or only related to differences in the mixing, mainly due to the wind forcing (Fig. 7b,e). The strongest MLD variations are located in the north-western part of the domain, in the Celtic Sea (Fig. 7g,h,i) and North Sea (Fig. 7j,k,l) boxes, where a significant deepening of the MLD is visible during the first simulated days for OA and OCE-aro simulations. This MLD deepening reaches 35 m in the first simulated days in North sea and up to 65 m in Celtic sea. Callum storm and its associated high turbulent fluxes are responsible for this strong MLD deepening. After the passage of Callum, a slow restratification is simulated in the Celtic Sea from 14 October which is also present but less visible in North Sea. These changes are not only located in the near-surface waters (where it exceeds  $-2^\circ\text{C}$ ), but also deeper, and even below the mixed layer depth (black line in Fig. 7g,j). For the Celtic Sea and North Sea boxes, differences of the OA simulation with the OCE-ifs simulation are large ( $\pm 2.5^\circ\text{C}$  corresponding to a mixing-induced dipole with cooling near the surface and warming near the thermocline, Fig. 7h,k) and much higher than the differences between the OA and the OCE-aro simulations (Fig. 7i,l). More generally for the four boxes, differences are larger when comparing OCE-ifs to OA than when comparing OA and OCE-aro. This illustrates that the effect of changing the atmospheric forcing has a larger effect on ocean surface and also vertical profiles, than changing from a forced to a coupled simulation. OCE-ifs and OCE-aro have been compared to the available in-situ profile measurements (Argo floats, CTD profiles, mooring, gliders and drifting buoys, from the CORA 5.2 database, Szekely et al., 2019) for the OML temperature (*i.e.* around 13 m-depth) through Root Mean Square Errors (RMSE, Fig. 8) to examine further the mixed layer representation. It shows in fact that the two ocean-only simulations have quite similar skill scores on average over the domain and along the simulation period, with very slightly lower RMSE for OCE-ifs than for OCE-aro (Fig. 8b), but some large improvements are found locally when using AROME forcing, notably along Cornwall coasts in the Celtic Sea (Fig. 8a).

Differences between daily-averaged (last simulated day) ocean mixed layer depth (MLD) simulated by the three simulations (OA, OCE-ifs and OCE-aro) are represented in Figure 9. The highest daily-averaged MLD values are found in the north-westernmost part of the domain, around 100 m deep, up to 150 m locally, and in the Celtic Sea (80-100 m) (Fig. 9a). The smallest values ( $< 30 \text{ m}$ ) are found in the coastal areas (in relation with lower SSS values in the river plumes) and in the Mediterranean Sea.



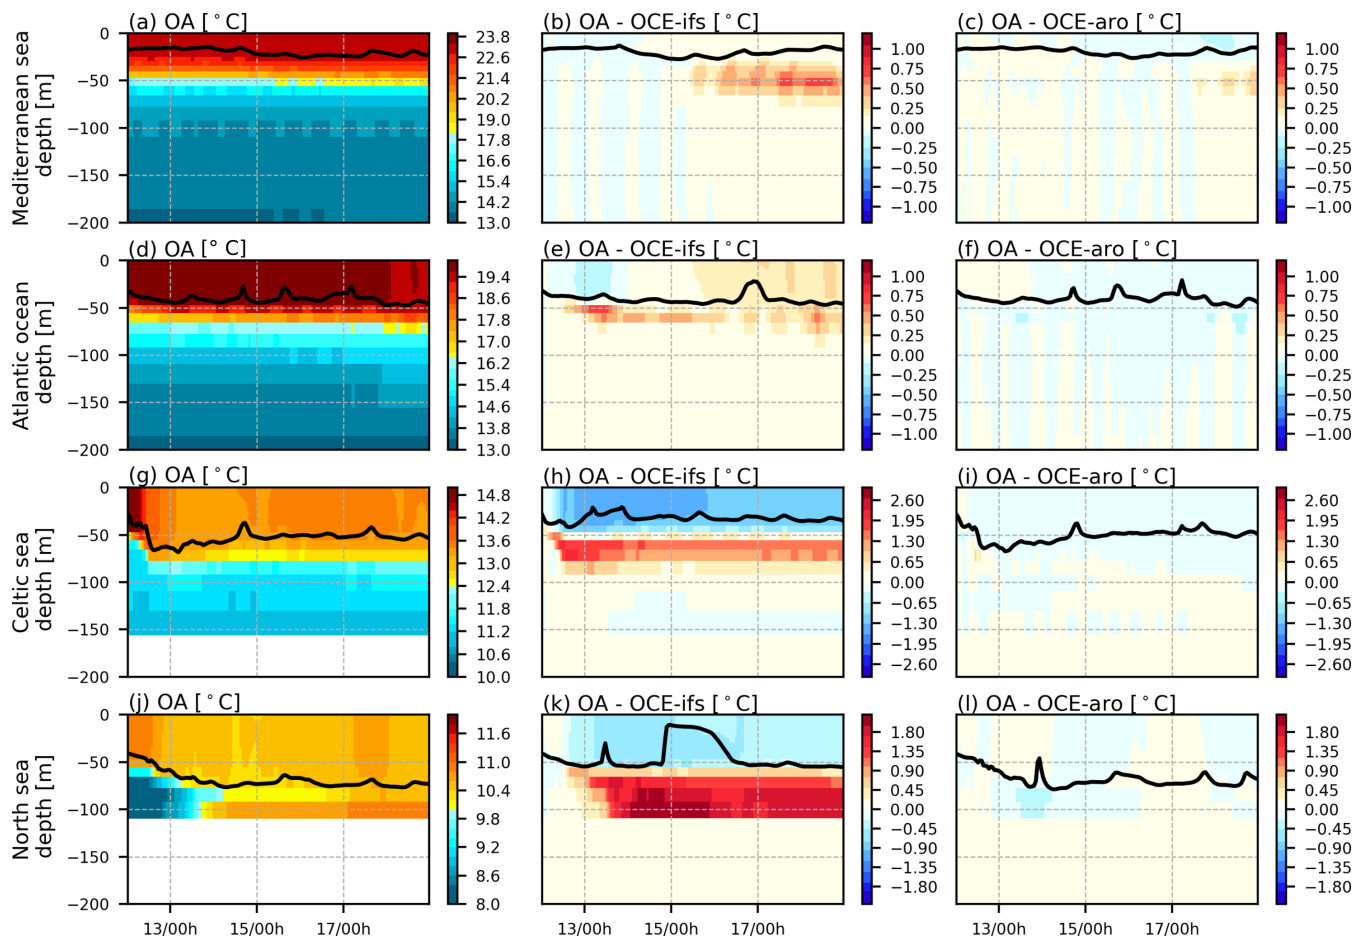

**Figure 7.** Temporal evolution of the mean vertical temperature profiles in the four zones (see Fig. 3d) simulated by the coupled (OA) simulation (a,d,g,j) and differences with the two forced ocean simulations (OA-OCE-ifs in b,e,h,k and OA-OCE-aro in c,f,i,l). The black lines delimit the averaged MLD of OA (a,d,g,j), OCE-ifs (b,e,h,k) and OCE-aro (c,f,i,l).

405 Maximum differences between OA and OCE-ifs are localised around the British Islands and can reach  $\pm 50$  meters. Here again, differences between OA and OCE-aro are smaller, even if located in the same areas (Fig. 9c). When computing the relative differences between OA and OCE-ifs (blue bars in Fig. 10), they exceed more than 50% in the Celtic sea and 30% in the North and Mediterranean seas, while, in the Atlantic box, differences are smaller (below 5%). Computing the same MLD differences for the pairs OA vs OCE-aro (orange bars) and OCE-aro vs OCE-ifs (green bars) highlights that differences in the MLD are maximum for OA vs OCE-ifs and of the same order of magnitude between OCE-aro and OCE-ifs. As discussed in the previous Section, it means that the effect of the change in atmospheric forcing is responsible of the main signature in changes in the near-surface oceanic structure, and that the effect of the coupling only accentuates this oceanic response.

410



(a) OCE-ifs – OCE-aro diff. in RMSE for temperature at 13.5 m-depth

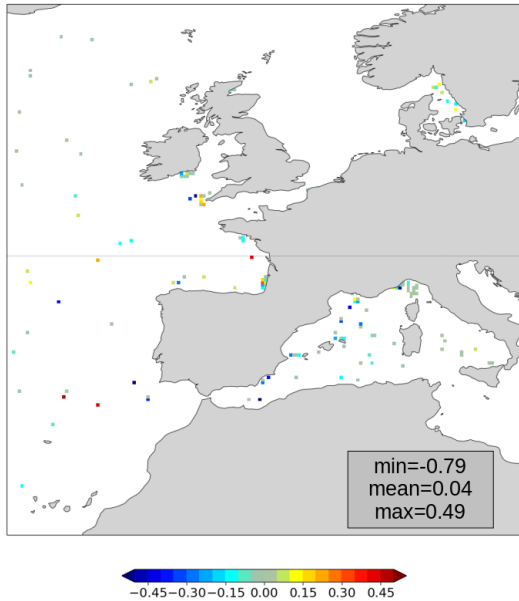

(b) RMSE time-series for temperature at 13.5 m-depth

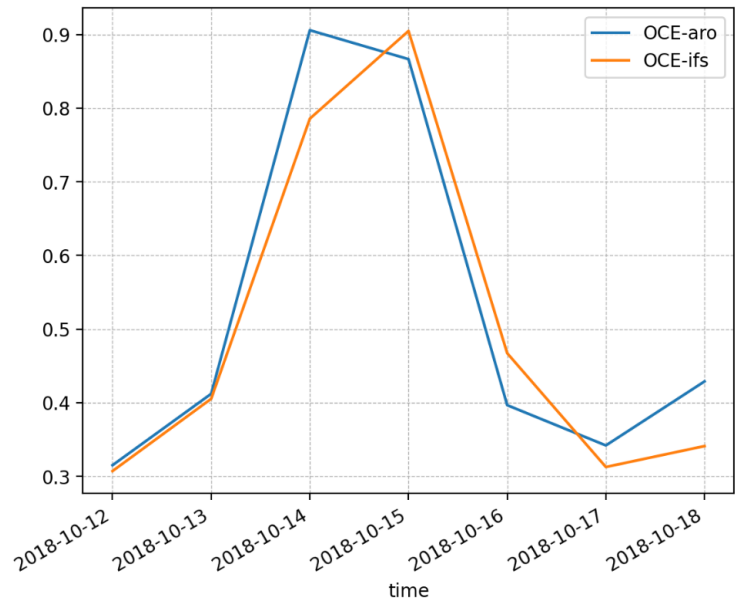

**Figure 8.** Forecast error for temperature at vertical level number 10 (around 13.5 meter-depth), expressed as a RMSE in  $^{\circ}\text{C}$  : (a) difference between OCE-ifs errors and OCE-aro errors at observation points, during the 7 simulated days (blue dot means lower RMSE in OCE-ifs); (b) time serie of the daily error, averaged over all observations available for each day, for OCE-ifs and OCE-aro.

Ocean mixed layer depth [m] (1 day average ; 18.10.2018)

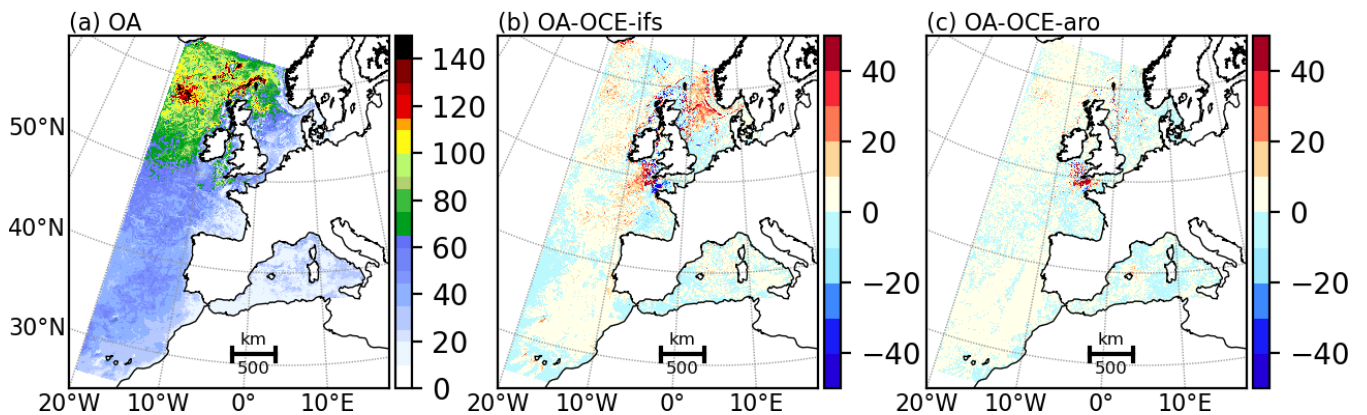

**Figure 9.** Daily-averaged oceanic mixed layer depth (m) simulated by OA simulation on the last day of simulation (a) and its-differences (in meters) with OCE-ifs and OCE-aro forced simulations (b, c).

1 day average ; 18.10.2018

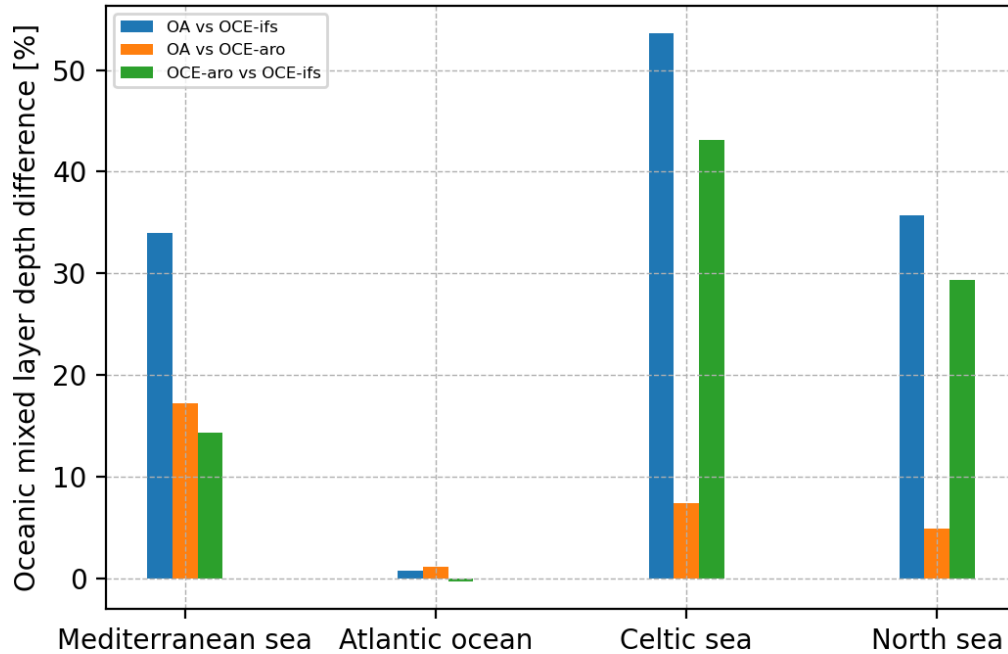

**Figure 10.** Instantaneous oceanic mixed layer depth differences between pairs of simulation after 168 simulated hours extracted in the four areas presented in Figure 3d.

## 4.2 Atmospheric forecast

In this section, we compare AROME forced (ARO) and AROME-NEMO coupled (OA) simulations (Table 2), in order to quantify the impact of OA interactive coupling on the atmospheric forecast. When possible, we also compare it to the IFS atmospheric forecast used to drive the OCE-ifs simulation. In the ARO simulation, the sea surface temperature (SST) is persistent and equal to the SST field used as initial condition in the OA simulation (Fig. 3a) and the oceanic surface currents are null, while in the OA simulation, the evolution of sea surface temperature and currents are taken into account.

### 4.2.1 Wind

The OA simulated wind field is examined in Figure 11 and compared to in-situ wind measurements available in the Coriolis database (colored circles in Fig. 11). It is important to note that the wind observations are set at a height of 10 meters, thus we use a 10-m diagnostic wind from AROME and not the prognostic 5-m wind values.

During the first simulated day (12 Oct., Fig. 11a,d,g), the storm Callum moves towards the British Islands, inducing strong wind (above  $20 \text{ m.s}^{-1}$ ) over a wide area affecting Portugal to United Kingdom. Locally, wind speed value reaches the maximum value of  $41.5 \text{ m s}^{-1}$  in the Celtic Sea. The comparison with data (circles in Fig. 11a) shows that OA and ARO overestimates wind speed at that time. This overestimation is less important in OCE-ifs simulation (Fig. 11g). These differences between

425 the wind speed simulated by ARO and OA and the wind speed simulated by OCE-ifs simulation explain the differences on  
sea surface cooling discussed in Section 4.1. It can reach  $10 \text{ m.s}^{-1}$  in some places, inducing differences in surface turbulent  
fluxes, oceanic vertical mixing and thus sea surface cooling. The maximum differences between the OA and ARO simulations  
are located along the Callum storm passage, where strong winds are present (Fig. 11a). They reach  $\pm 5 \text{ m.s}^{-1}$  locally, corre-  
sponding to more than 20% of the simulated 10-m wind speed. Elsewhere in the domain, effect of coupling on the 10-m wind  
430 speed is relatively small ( $< 1 \text{ m.s}^{-1}$ ). This suggests that, for these short-forecast ranges, coupling only changes the internal  
dynamics of the storm with embedded convection. On 15 Oct. 00UTC (Fig. 11b,e,h),  $\Theta$ AOA, ARO and OCE-ifs simulate a  
wind structure related to the remnants of Michael and Leslie close to Galicia. The comparison to buoy observations shows a  
good correspondence for both simulations, even if wind measurements are mainly localised close to the coasts and miss the  
stronger wind area. Figure 11c,f,j shows that at the end of the simulation (after 6 days),  $\Theta$ Aall simulations still performs well  
435 when compared to in-situ observations, for coastal as offshore locations, even if, again, there are no observations where OA,  
ARO and OCE-ifs simulate their highest wind values. After 3 and 6 simulated days (Fig. 11b,e,c,f), the maximum differences  
between OA and ARO are now located in the western half of the domain, where the storms Callum, Leslie and Mickael have  
moved. They reach  $\pm 4 \text{ m.s}^{-1}$  locally and correspond to more than 100% at some locations, meaning that the low-level dynam-  
ics started to significantly diverge between the two simulations and impact of OA coupling on atmospheric forecast starts to be  
440 significant.

Despite these overall spatial differences, the effect of the OA coupling does not significantly change the temporal evolution  
of the 10-m wind speed forecasts in comparison to OCE-aro forced simulation and to mooring data (Fig. 12 ; Fig. 13). Note  
that the 10-m wind speed simulated by OCE-ifs has better scores than OA and ARO simulations at the mooring locations (Fig.  
445 12), which can be explained by the wind overestimation in OA and ARO (as seen for M1 and M2 examples). Regarding the M1  
moored buoy ( $58.3^\circ\text{N}$ - $0.1^\circ\text{E}$ , north-east of the coasts of Scotland), however, OA reproduces quite well the first wind peak in  
the afternoon of 12 Oct., but simulates a too strong and too early second peak on 13 Oct (Fig. 12a). Moderate wind ( $13 \text{ m s}^{-1}$ )  
are also simulated in south-western Mediterranean. The wind time-series at M2 ( $36.4912^\circ\text{N}$ ,  $6.9611^\circ\text{W}$ , in the Gulf of Cadix,  
west of Gibraltar Strait) in Fig. 12b shows the good agreement of the OA simulation in this area. This can also be seen in the  
450 latest days in Figure 12a,b.

The Taylor diagram in Figure 12c summarised the OA skill scores for the 7 day-period, when compared to all in-situ wind  
observations together, and to M1 and M2 separately. The mean bias is  $1.3 \text{ m s}^{-1}$ , the standard deviation is  $4.1 \text{ m s}^{-1}$ , and the  
correlation is 0.36 on average. This bias on AROME wind speed was already identified in Rainaud et al. (2016) and Léger et al.  
(2016), in particular for strong wind situation and when comparing to coastal observing platforms. Further investigation would  
455 be needed to understand the origin of such systematic bias, looking into both the AROME physics and the method to diagnose  
the wind at 10 meters, but is out of the scope of this paper.

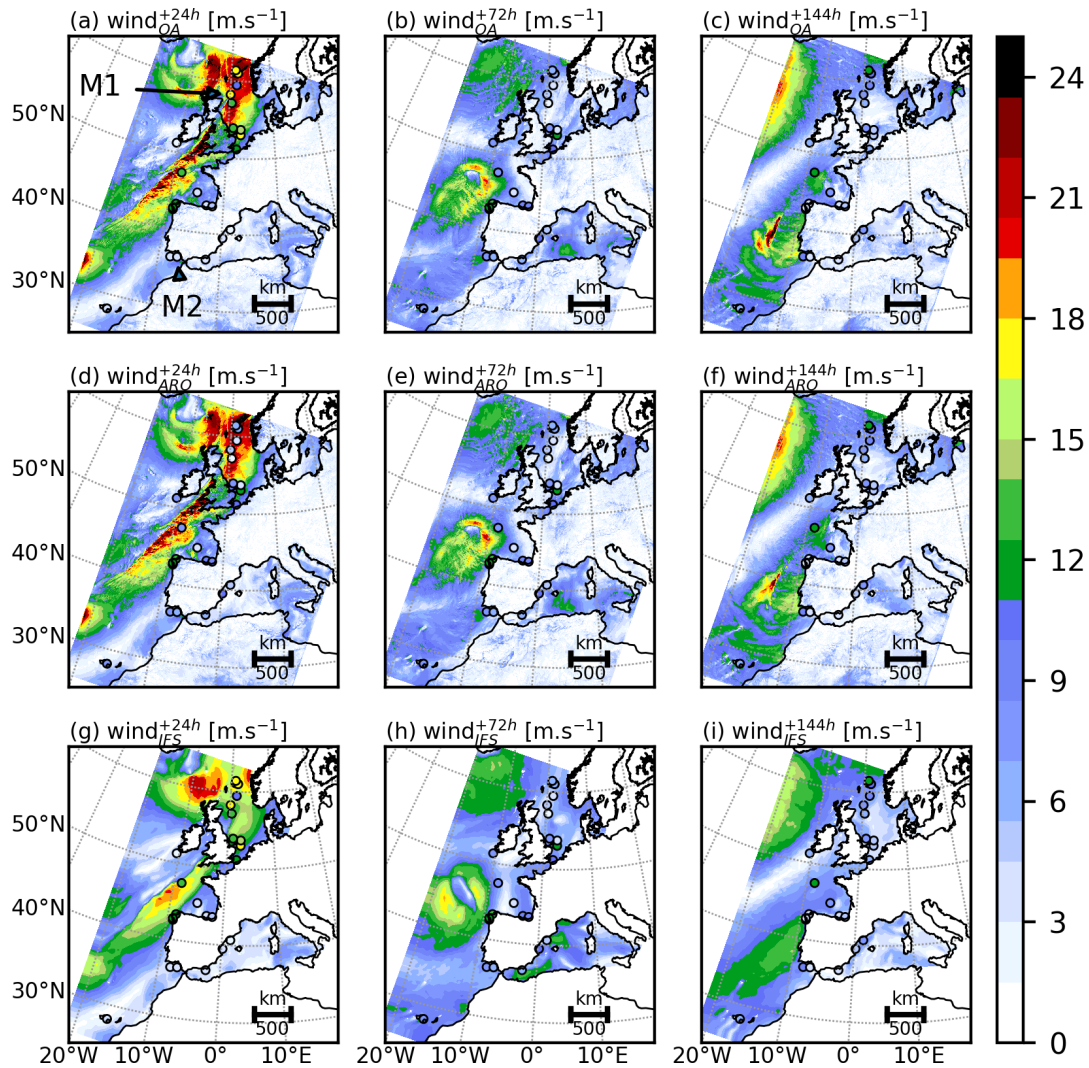

**Figure 11.** Instantaneous 10 m-ASL wind speed ( $\text{m s}^{-1}$ ) simulated by OA (a,b,c), ARO (d,e,f) and **IFS seen by** OCE-ifs (g,h,i), for forecast ranges of (a,d,g) +24h (13 Oct. 2018, 00UTC), (b,e,h) +72h (15 Oct. 2018 00UTC) and (c,f,i) +144h (18 Oct. 2018 00UTC). The colour circles represent the wind speed measured by mooring buoys at that time ; M1 and M2 labels in (a) indicate the location of the two mooring buoys used in Figure 12.

#### 4.2.2 Rainfall

The temporal evolution of rainfall simulated by OA, ARO and OCE-ifs simulation is presented in Figure 13e,f,g,h. The intensity of rainfall differs between the 3 simulations but the chronology remains the same, except for the Mediterranean where there is more rainfall in IFS (OCE-ifs) than in AROME (ARO and OA). Hourly rainfall amounts exceed 10 mm in some places and are related to the passage of the various storms.

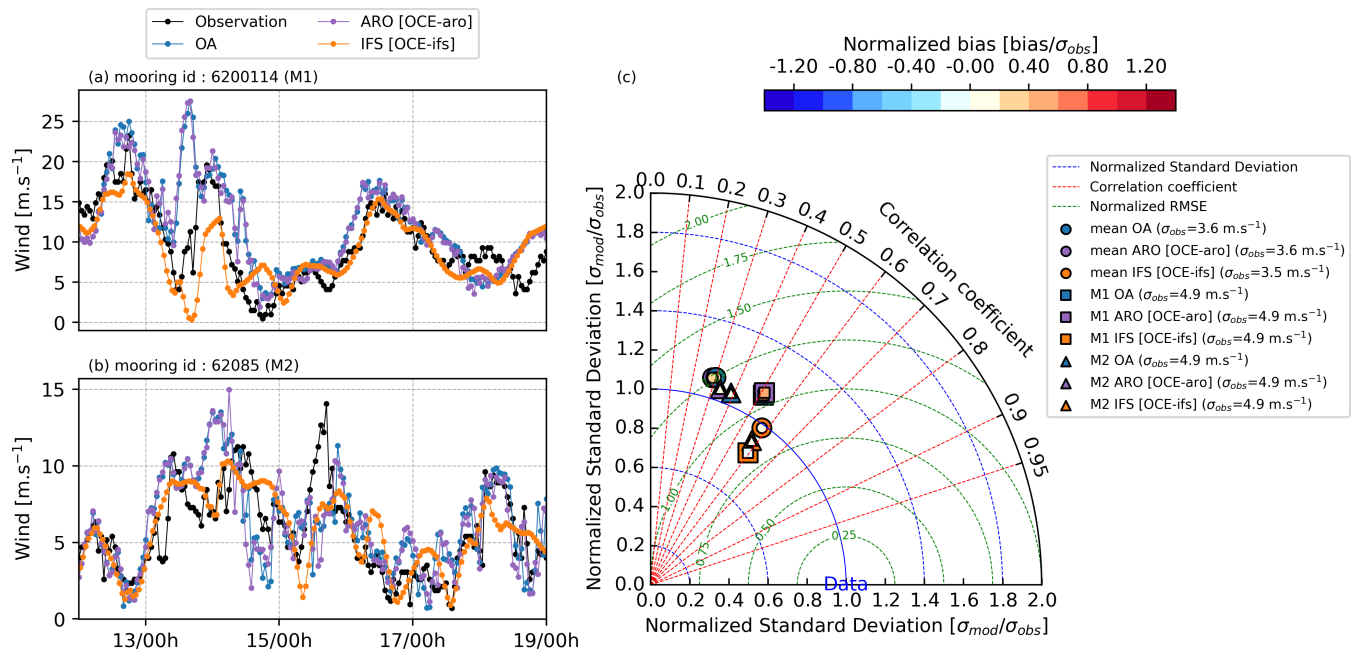

**Figure 12.** Temporal evolution of 10-m wind speed observed and simulated at the location of two moorings M1 (a) and M2 (b) (see Figure 11a for locations). (c) Taylor diagrams made for the whole dataset of 44 selected moorings in circles, for moorings M1 and M2 only in squares and triangles, respectively. The external colour indicates the experiment: blue for OA, purple for ARO [OCE-aro] and orange for IFS [OCE-ifs].

In the OA coupled simulation, the accumulated precipitation during the 7 simulated days is shown in Figure 14a. Since we do not have the precipitation on land in the IFS data used to force NEMO, we cannot compare with OCE-ifs simulation. The rain is heterogeneously distributed over the domain. In the Bay of Biscay, it follows the trajectory of Callum with rainfall reaching 200 mm in the two first simulated days (Fig. 14c). In the Aude department (Fig. 14e), where the heavy precipitating event described in section 3.1 occurred, the simulated accumulated precipitation reaches 300 mm in 1 day as observed, but are located about 100 km to the east of the observed one. This location corresponds to the Massif Central relief (also known as the Cévennes), suggesting that the rapid and moist marine low-level flow is well reproduced, but with a slightly different orientation than observed and thus with a dominant triggering factor related to orographic uplift [whereas it was in fact related to convergence between the south-easterly flow with a cold front (Caumont et al., 2021)]. However, it is important to note that the Mediterranean HPE correspond to forecast ranges between +66h and +90h for AROME, *i.e.* quite far from the standard AROME forecast operational ranges. Despite the fact that observed and simulated intense precipitation amounts are not located exactly at the same place, the heavy precipitation signature with large values of rainfall amounts in only few hours in the OA forecast, appears very valuable in the context of very early warning of such severe events. We also highlight here the impact of the OA coupling on the rainfall amounts during the 7 days, as shown in the Figure 14b. The mean accumulated precipitation over the whole domain differs between the coupled and forced simulations by less than 0.5%. However, total rainfall amounts



can vary locally by more than 100 %, especially in the north of Balearic Islands (5°E, 40°N) or close to Sicily (15°E, 38°N). Concerning the heavy precipitation that took place in Wales (Fig. 2), the differences between the OA and ARO simulations in total rainfall amounts during the first 48 hours presented in the Figure 14d are quite small. The maximum differences reach about 20 mm and represent locally up to only 10 % of the 48h-cumulated rainfall amount. These differences are related to small displacements of the rain bands, linked to changes in the wind maxima localisation discussed in the previous section (Fig. 11d). The effect of coupling is clearly visible for the Mediterranean heavy precipitating event (cf. observed case in Fig. 2). Fig. 14f shows that the 24h-rainfall amounts forecast in the OA simulation diverge from the ARO simulation. The precipitation areas are shifted in the OA simulation, which can be explained by the differences in low level wind convergence position, that is a key triggering factor for mesoscale convective systems that generate heavy precipitations. This high sensitivity of wind convergence to sea surface structures and their evolution over north-western part of the Mediterranean Sea was already highlighted in previous studies (e.g. Rainaud et al., 2017; Meroni et al., 2018) and is there confirmed.

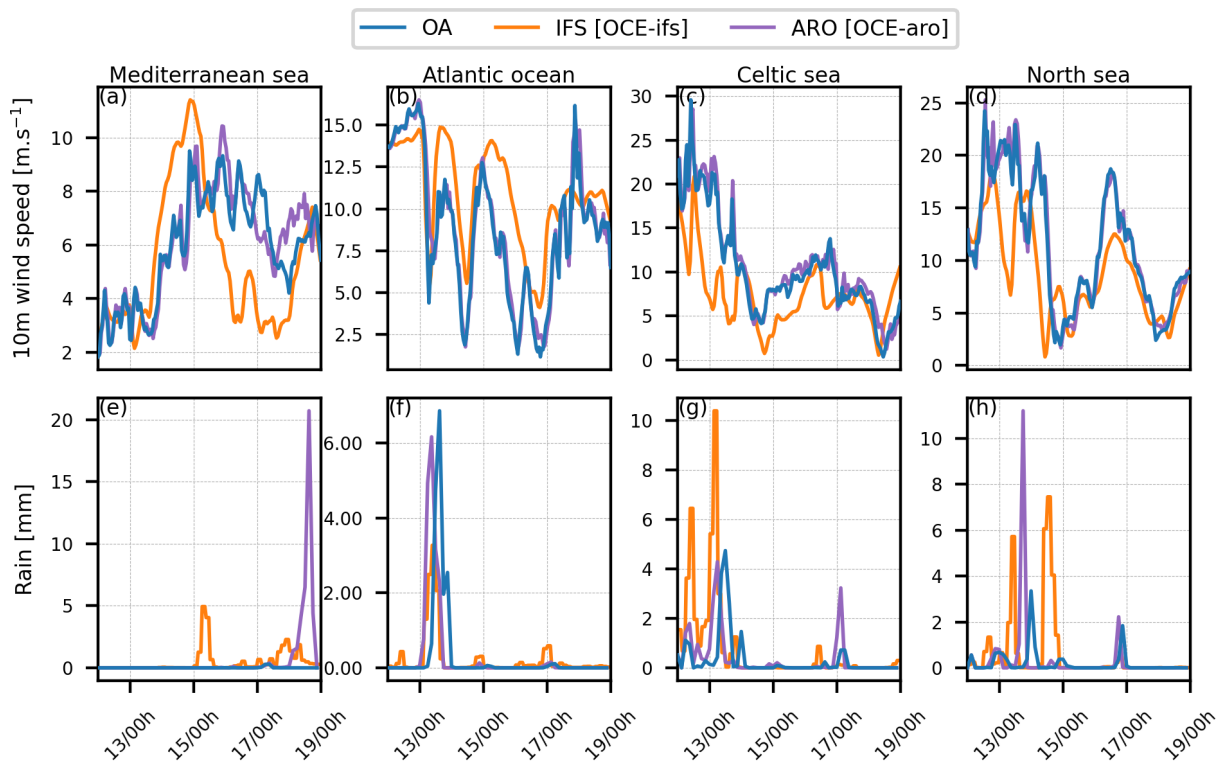

**Figure 13.** Temporal evolution of simulated 10m wind speed ( $\text{m.s}^{-1}$  ; a,b,c,d) and rainfall ( $\text{mm/h}$  ; e,f,g,h) extracted in the four areas presented in Figure 3d.

### 4.3 Impact of OA coupling on the oceanic forecast

In this section, we compare NEMO forced simulations (OCE-ifs and OCE-aro) and AROME/NEMO coupled (OA) simulations (Table 2)



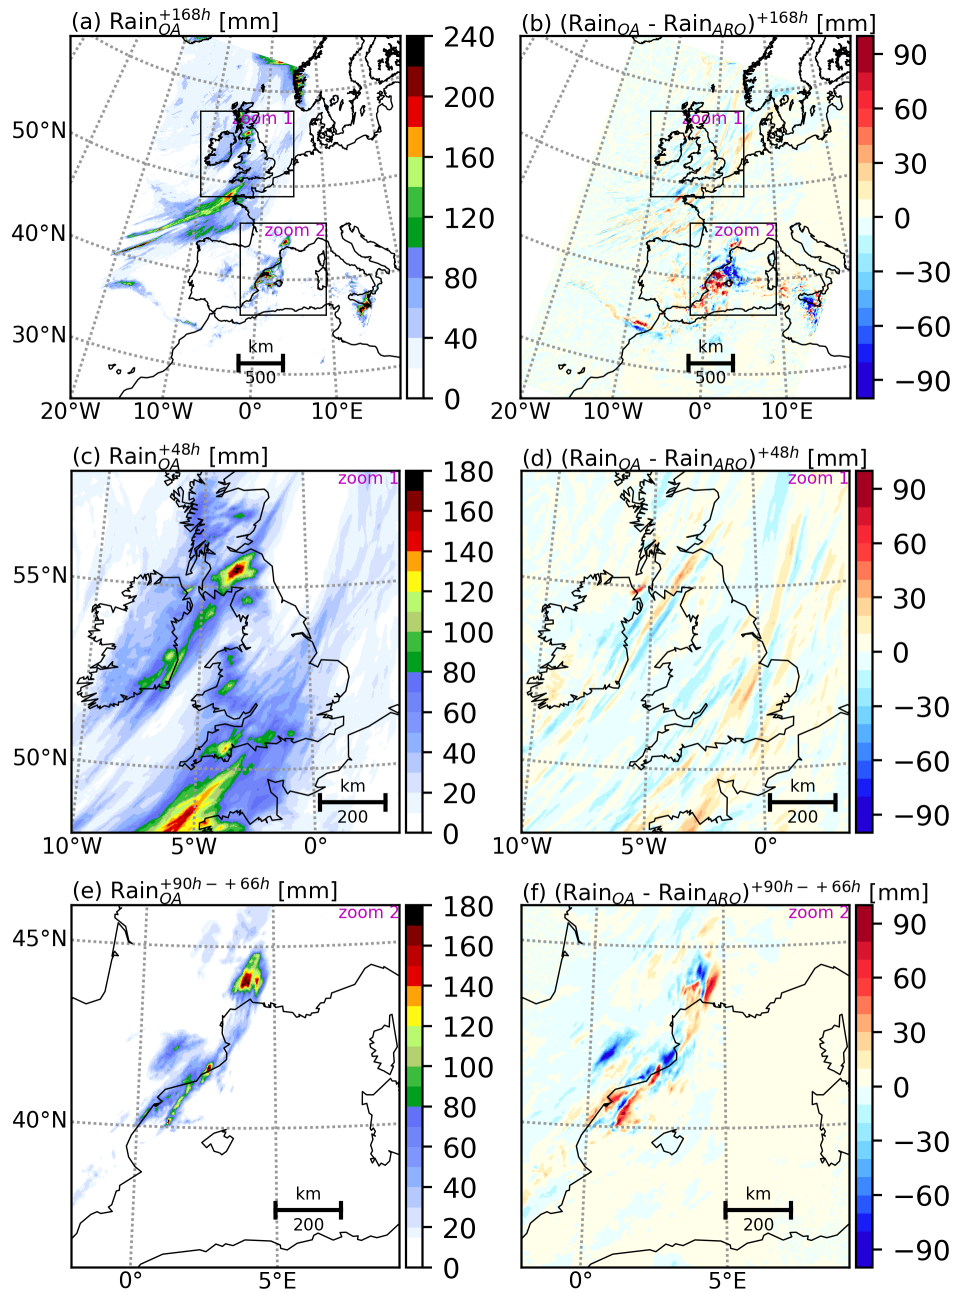

**Figure 14.** Accumulated precipitation (mm) simulated by the coupled (OA) simulation [left column] and differences with the ARO forced simulation [right column]: (a,b) Total amounts over the 7 day-period, 24h-accumulated amounts (c,d) over British Islands between 12 Oct. 00UTC and 13 Oct. 00UTC (+00 to +24h forecast ranges), and (e,f) over Western Mediterranean area between 14 Oct. 18UTC and 15 Oct. 18UTC (between +66h and +90h forecast ranges).

### 490 4.3.1 Sea surface temperature, salinity, height and currents

The effect of coupling on the temporal evolution of the oceanic surface field forecast is presented in Fig. 6. First, we can note that AROME-ifs and AROME-aro (Fig. 6m,n,o,p) display the impact of atmospheric forcing on the sea surface currents, which are on average less intense in the OCE-ifs and OCE-aro. Regarding the SSH (Fig. 6i,j,k,l), the main signal is due to tidal oscillations. The differences between the 3 simulations are relatively small.

### 4.3.2 Temperature vertical profiles

495 The temporal evolution of the temperature profiles simulated by the coupled and forced simulations are computed for the same four boxes as in Fig. 6.

### 4.3.3 Oceanic boundary layer depth

Differences between ocean mixed layer depth (MLD) simulated by the three simulations (OA, OCE-ifs and OCE-aro) are represented in Fig. 6q.

## 4.4 Impact of OA coupling on the atmospheric forecast

In this section, we compare AROME forced (ARO) and AROME/NEMO coupled (OA) simulations (Table 2), in order to quantify the impact of the OA coupling on the atmospheric forecast.

### 500 4.4.1 Wind

Whether after 1, 3 or 6 days of simulation, the wind simulated by the forced (ARO) and the coupled (OA) simulations shows differences (Fig. 7). Despite these overall differences, the effect of the OA coupling does not significantly change the temporal evolution of the 10-m wind speed.

### 4.4.2 Rainfall

We highlight here the impact of the OA coupling on the rainfall amounts during the 7 days, as shown in the Figure 14b. The mean accumulated rainfall is higher in the OA simulation than in the ARO simulation.

## 505 5 Conclusions

A new forecast-oriented high-resolution ocean-atmosphere coupled system using state-of-the-art AROME (cy43) and NEMO (3.6) models has been described and evaluated through comparisons with observations in this paper. A new domain over Western Europe, including the two domains used for high resolution atmospheric and oceanic forecasts at Météo-France and Mercator Ocean International (MOI) respectively, has been designed. This coupled system was evaluated through 7-day simulations performed around an October 2018 study case. This case was chosen because during these 7 days, three storms and two intensively raining periods occur over the simulated domain, which makes it a good candidate to study ocean-atmosphere coupling impacts, as air-sea interactions are exacerbated by such extreme conditions.

This new coupled system successfully simulates the different storms and their associated strong wind and surface turbulent fluxes. The maximum precipitation values of the two extreme rainfall events are also well simulated. Oceanic response associated with these extreme conditions shows significant vertical oceanic mixing along the storms tracks. This mixing is

responsible of an intense sea surface cooling of more than 1.5°C in some places. Comparisons with observations (satellites and drifting buoys) show that this cooling is well localised even if too intense, notably in the Celtic Sea. This coupled system also successfully simulates the oceanic tides with their associated sea surface height and currents variations. For this latter parameter notably, additional investigations will be needed to further explore the role of the current-feedback implementation in the AROME-NEMO coupled system.

To evaluate the effect of OA coupling in the atmospheric and oceanic forecast, three additional simulations have been performed in a forced mode. Two simulations close to the current operational forecast systems operated at Météo-France and MOI respectively were run, and a third simulation with NEMO was set to understand the source of the main differences for ocean forecast. Indeed, compared to the closest simulation of the current operational system operated at MOI, the OA coupled system has two main differences: it uses a different atmospheric model (AROME versus IFS) with higher horizontal resolution (2.5 km compared to 9 km) and represents ocean-atmosphere feedbacks. The different simulations show that the effect of changing the atmospheric model (and in particular its associated horizontal resolution) has a greater effect on the ocean forecast than taking into account the ocean-atmosphere feedbacks. The combined effect of both is visible on the surface fields, SST, SSS and currents, but also on the structure of the oceanic mixed layer. It is explained by a stronger wind in the atmospheric forcing with AROME at 2.5 km horizontal resolution (+20% in some places), which leads to stronger surface fluxes, and thus to a stronger oceanic response. Sea surface cooling can be higher than 6°C in some places for our study case, it can affect the entire oceanic mixed layer, and is exacerbated where storms are located. The effect of ocean-atmosphere coupling on atmospheric forecast has been examined through comparison of simulated 10-m wind speed and accumulated precipitations with the forced simulation, in which SST is kept persistent. Modifications due to coupling appear from the first simulated hours and increase over simulated time. The SST evolution in the OA simulation leads to changes in the location of the oceanic frontal structures notably, which induce changes in the wind convergence, and thus in the location of the atmospheric convection areas and heavy rainfall. The coupling impact on the simulated wind and precipitation can vary up to 100% in some places.

In summary, the coupled system slightly changes the atmospheric forecast on average even if strong differences are found locally for 10-m wind speed and rainfall amounts, and significantly improves the sea surface temperature forecast (with a bias reduction of 30 %), when compared with the equivalent uncoupled forecast systems of Météo-France and MOI, respectively, and with the observations available over the simulation period and in our study area.

Even if other case studies are necessary, this work already highlights the relevance of high-resolution ocean-atmosphere coupling for the two kinds of forecast. It also shows the affordability of such numerical prediction system regarding the computation costs (see appendix A) that can be shared and especially through the development of common tools. Still, future challenges remain for an operational implementation of such high-resolution coupled system, in particular the insertion of a coupled data assimilation scheme, with also the issue of the data availability for both components, and a coordinated code management with objectives of continuously improving the computing efficiency. Nevertheless, thanks to our joint work for

its update, with the development and application to a new region, the AROME-NEMO coupled system permits now to further apprehend operational ocean-atmosphere coupling in both institutes, Météo-France and Mercator Ocean International.

*Code and data availability.* NEMO is available at <https://www.nemo-ocean.eu/> after a user registration on the NEMO website. The version used is NEMO\_v3.6. OASIS3-MCT was used in version OASIS3-MCT\_4.0. It can be downloaded at <https://portal.enes.org/oasis>. The public  
555 may copy, distribute, use, prepare derivative works and publicly display OASIS3-MCT under the terms of the Lesser GNU General Public License (LGPL) as published by the Free Software Foundation, provided that this notice and any statement of authorship are reproduced on all copies. SURFEX open-source version (Open-SURFEX) including the interface with OASIS from v8\_0 is available at <http://www.umr-cnr.fr/surfex/> using a CECILL-C Licence (a French equivalent of the L-GPL licence; [http://www.cecill.info/licences/Licence\\_CeCILL-C\\_V1-en.txt](http://www.cecill.info/licences/Licence_CeCILL-C_V1-en.txt)), but with exception of the gaussian grid projection, the LFI and FA I/O formats, and the dr HOOK tool. Although the operational  
560 AROME code cannot be obtained, the modified sources for cy43 are available on demand to the authors for the partners of the ACCORD consortium and are included in the new Météo-France official release based on cycle 48 (cy48t1). Outputs from all simulations discussed here are available upon request to the authors.

The moored and drifting buoys data were collected and made freely available by the Coriolis project and programmes that contribute to it (<http://www.coriolis.eu.org>). **The L3S SST satellite data were provided by GHRSSST and the CMEMS Regional Data Assembly Centre.**  
565 FES2014 was produced by Noveltis, Legos and CLS and distributed by Aviso+, with support from Cnes (<https://www.aviso.altimetry.fr/>).

*Author contributions.* All authors (JP, JB, CLB, GS, GF and GG) contributed to the conceptualisation and methodology of the study as well as drafting, reviewing and editing the article. GF finalized the Vortex/Olive-Swapp experimental configuration for coupled simulations and extracted the IFS forecast files. The configurations NEMO-eNEATL36 and AROME-Mercator were developed by JP and JB, who also ran the coupled and uncoupled simulations. JP, JB, CLB, GS and GG carried out the analysis of the results.

570 *Competing interests.* The authors declare that they have no conflict of interest.

*Acknowledgements.* This work was funded by Mercator Ocean International. The authors thank Sylvie Malardel, Soline Bielli (LACy), Sébastien Riette (CNRM) and the SWAPP system team (Météo-France) who helped us in the implementation of the coupled experiment design in the Vortex/Olive-Swapp environment.

575 **A1 Coupling masks between NEMO and AROME**

Figure XX presents the masked parts of each domain. The black areas in Figure XXa correspond to where NEMO does not resolve the ocean.

**A2 Simulation environment and High Performance Computing characteristics**

All the developments are performed using Vortex/Olive python-based framework, used to run AROME operational simulations at Météo-France. This coupling system is running on the new Météo-France supercomputer belenos  
 580 (https://www.top500.org/system/179853/). In total, this supercomputer has 294 912 cores on 2 307 nodes and a peak performance of approximately 10.5 PFlop/s. Each nodes have a Random Access Memory (RAM) of 256 GB minimum.

Table A1 summarises the computational cost of the different simulations presented in this article (Tab. 2).

The coupled simulation runs on 15 nodes and 424 cores corresponding to 12 nodes and 384 cores for AROME, 2 nodes and  
 585 32 cores for NEMO and 1 node and 8 cores for XIOS. Simulated time is roughly 12 h for AROME (ARO) and AROME/NEMO (OA) simulations indicating that the effect of OASIS coupler is negligible for this coupled system. The OA simulation CPU cost does not exactly correspond to the sum of the executions of AROME and NEMO/XIOS, as NEMO cores pass some time to wait AROME fields in this configuration. It is indeed superior to the 18 432 CPU hours for one AROME forced (ARO) simulation plus the CPU cost of the oceanic model and the XIOS server for coupled AROME/NEMO (OA) simulation and  
 590 finally corresponds to a 20 % total additional CPU cost (23 040 CPU hours). Note that simulated time of NEMO simulations alone (OCE-aro and OCE-ifs simulations) are roughly equal to 8.5 h (with 2 nodes and 32 cores for NEMO and 1 node and 8 cores for XIOS) corresponding to CPU cost of approximately 3 280 CPU hours (14.2 % of the CPU cost of the OA coupled system). For the purpose of this comparison, we used the same number of nodes for NEMO simulations alone (OCE-aro and OCE-ifs simulations) as the one used in AROME/NEMO simulations but it can be optimised, for example, by increasing the  
 595 number of used cores by node.

**Table A1.** Elapsed time and computational cost of the different 7-day simulations. 1 node contains 128 cores and CPU cost is equal to elapsed time by the number of nodes by 128 (the number of cores by nodes) whatever the true number of nodes effectively used.

| Simulation        | Elapsed time | Nb nodes | CPU cost             |
|-------------------|--------------|----------|----------------------|
| OA                | ≈ 12 h       | 15       | 23 040 h             |
| ARO               | ≈ 12 h       | 12       | 18 432 h (80% of OA) |
| OCE-ifs / OCE-aro | ≈ 8.5 h      | 3        | 3 280 h (14 % of OA) |

## References

- Arnold, A. K., Lewis, H. W., Hyder, P., Siddorn, J., and O’Dea, E.: The sensitivity of British weather to ocean tides, *Geophysical Research Letters*, <https://doi.org/10.1029/2020GL090732>, <https://onlinelibrary.wiley.com/doi/10.1029/2020GL090732>, 2020.
- 600 Bao, J.-W., Wilczak, J. M., Choi, J.-K., and Kantha, L. H.: Numerical Simulations of Air-Sea Interaction under High Wind Conditions Using a Coupled Model: A Study of Hurricane Development, *Monthly Weather Review*, 128, 2190–2210, [https://doi.org/10.1175/1520-0493\(2000\)128<2190:NSOASI>2.0.CO;2](https://doi.org/10.1175/1520-0493(2000)128<2190:NSOASI>2.0.CO;2), 2000.
- Barnier, B., Madec, G., Penduff, T., Molines, J.-M., Treguier, A.-M., Le Sommer, J., Beckmann, A., Biastoch, A., Böning, C., Dengg, J., Derval, C., Durand, E., Gulev, S., Remy, E., Talandier, C., Theetten, S., Maltrud, M., McClean, J., and De Cuevas, B.: Impact of partial steps and momentum advection schemes in a global ocean circulation model at eddy-permitting resolution, *Ocean Dynamics*, 56, 543–567, 605 <https://doi.org/10.1007/s10236-006-0082-1>, <http://link.springer.com/10.1007/s10236-006-0082-1>, 2006.
- Bastin, S., Drobinski, P., Guénard, V., Caccia, J.-L., Campistron, B., Dabas, A. M., Delville, P., Reitebuch, O., and Werner, C.: On the Interaction between Sea Breeze and Summer Mistral at the Exit of the Rhône Valley, *Monthly Weather Review*, 134, 1647 – 1668, <https://doi.org/10.1175/MWR3116.1>, <https://journals.ametsoc.org/view/journals/mwre/134/6/mwr3116.1.xml>, 2006.
- Bender, M. A. and Ginis, I.: Real-Case Simulations of Hurricane–Ocean Interaction Using A High-Resolution Coupled Model: Effects on 610 Hurricane Intensity, *Monthly Weather Review*, 128, 917–946, [https://doi.org/10.1175/1520-0493\(2000\)128<0917:RCSOHO>2.0.CO;2](https://doi.org/10.1175/1520-0493(2000)128<0917:RCSOHO>2.0.CO;2), [https://journals.ametsoc.org/view/journals/mwre/128/4/1520-0493\\_2000\\_128\\_0917\\_rcsoho\\_2.0.co\\_2.xml](https://journals.ametsoc.org/view/journals/mwre/128/4/1520-0493_2000_128_0917_rcsoho_2.0.co_2.xml), 2000.
- Bergeron, J.-P.: Contrasting years in the Gironde estuary (Bay of Biscay, NE Atlantic) springtime outflow and consequences for zooplankton pyruvate kinase activity and the nutritional condition of anchovy larvae: an early view, *ICES Journal of Marine Science*, 61, 928–932, <https://doi.org/10.1016/j.icesjms.2004.06.019>, <https://doi.org/10.1016/j.icesjms.2004.06.019>, 2004.
- 615 Blayo, E. and Debreu, L.: Revisiting open boundary conditions from the point of view of characteristic variables, *Ocean Modelling*, 9, 231–252, <https://doi.org/10.1016/j.ocemod.2004.07.001>, <https://linkinghub.elsevier.com/retrieve/pii/S1463500304000447>, 2005.
- Bouin, M.-N. and Lebeaupin Brossier, C.: Surface processes in the 7 November 2014 medicane from air–sea coupled high-resolution numerical modelling, *Atmospheric Chemistry and Physics*, 20, 6861–6881, <https://doi.org/10.5194/acp-20-6861-2020>, <https://acp.copernicus.org/articles/20/6861/2020/>, 2020a.
- 620 Bouin, M.-N. and Lebeaupin Brossier, C.: Impact of a medicane on the oceanic surface layer from a coupled, kilometre-scale simulation, *Ocean Science*, 16, 1125–1142, <https://doi.org/10.5194/os-16-1125-2020>, <https://os.copernicus.org/articles/16/1125/2020/>, 2020b.
- Brassington, G., Martin, M., Tolman, H., Akella, S., Balmeseda, M., Chambers, C., Chassignet, E., Cummings, J., Drillet, Y., Jansen, P., Laloyaux, P., Lea, D., Mehra, A., Mirouze, I., Ritchie, H., Samson, G., Sandery, P., Smith, G., Suarez, M., and Todling, R.: Progress and challenges in short- to medium-range coupled prediction, *Journal of Operational Oceanography*, 8, s239–s258, 625 <https://doi.org/10.1080/1755876X.2015.1049875>, <https://doi.org/10.1080/1755876X.2015.1049875>, 2015.
- Brenon, I. and Le Hir, P.: Modelling the Turbidity Maximum in the Seine Estuary (France): Identification of Formation Processes, *Estuarine, Coastal and Shelf Science*, 49, 525–544, <https://doi.org/https://doi.org/10.1006/ecss.1999.0514>, <https://www.sciencedirect.com/science/article/pii/S0272771499905140>, 1999.
- Brousseau, P., Seity, Y., Ricard, D., and Léger, J.: Improvement of the forecast of convective activity from the AROME-France system, *Quart. J. Roy. Meteorol. Soc.*, 142, 2231–2243, <https://doi.org/10.1002/qj.2822>, 2016.
- 630 Carniel, S., Benetazzo, A., Bonaldo, D., Falcieri, F. M., Miglietta, M. M., Ricchi, A., and Sclavo, M.: Scratching beneath the surface while coupling atmosphere, ocean and waves: Analysis of a dense water formation event, *Ocean Mod-*



- elling, 101, 101 – 112, <https://doi.org/https://doi.org/10.1016/j.ocemod.2016.03.007>, <http://www.sciencedirect.com/science/article/pii/S1463500316300051>, 2016.
- 635 Carrere, L., Lyard, F., Cancet, M., and Guillot, A.: FES 2014, a new tidal model on the global ocean with enhanced accuracy in shallow seas and in the Arctic region, in: EGU General Assembly Conference Abstracts, vol. p. 5481, EGU General Assembly Conference Abstracts, 2015.
- Carret, A., Birol, F., Estournel, C., Zakardjian, B., and Testor, P.: Synergy between in situ and altimetry data to observe and study Northern Current variations (NW Mediterranean Sea), *Ocean Sciences*, 15, 269–290, <https://doi.org/10.5194/os-15-269-2019>, 2019.
- 640 Caumont, O., Mandement, M., Bouttier, F., Eeckman, J., Lebeau-pin Brossier, C., Lovat, A., Nuissier, O., and Laurantin, O.: The heavy precipitation event of 14–15 October 2018 in the Aude catchment: a meteorological study based on operational numerical weather prediction systems and standard and personal observations, *Natural Hazards and Earth System Sciences*, 21, 1135–1157, <https://doi.org/10.5194/nhess-21-1135-2021>, <https://nhess.copernicus.org/articles/21/1135/2021/>, 2021.
- Charnock, H.: Wind stress on a water surface, *Quarterly Journal of the Royal Meteorological Society*, 81, 639–640, 645 <https://doi.org/10.1002/qj.49708135027>, <http://doi.wiley.com/10.1002/qj.49708135027>, 1955.
- Chen, S., Campbell, T. J., Jin, H., Gaberseck, S., Hodur, R. M., and Martin, P.: Effect of Two-Way Air–Sea Coupling in High and Low Wind Speed Regimes, *Monthly Weather Review*, 138, 3579 – 3602, <https://doi.org/10.1175/2009MWR3119.1>, <https://journals.ametsoc.org/view/journals/mwre/138/9/2009mwr3119.1.xml>, 2010.
- Chevallier, C., Herbette, S., Marié, L., Le Borgne, P., Marsouin, A., Péré, S., Levier, B., and Reason, C.: Observations of the 650 Ushant front displacements with MSG/SEVIRI derived sea surface temperature data, *Remote Sensing of Environment*, 146, 3–10, <https://doi.org/https://doi.org/10.1016/j.rse.2013.07.038>, <https://www.sciencedirect.com/science/article/pii/S003442571300326X>, *liege Colloquium Special Issue: Remote sensing of ocean colour, temperature and salinity*, 2014.
- Colella, S., Böhm, E., Cesarini, C., Garnesson, P., Netting, J., and Calton, B.: Product User Manual for All Ocean Colour Products (CMEMS-OC-PUM-009-ALL), Tech. rep., Copernicus Marine Environment Monitoring Service, [https://resources.marine.copernicus.eu/documents/](https://resources.marine.copernicus.eu/documents/PUM/CMEMS-OC-PUM-009-ALL.pdf) 655 [PUM/CMEMS-OC-PUM-009-ALL.pdf](https://resources.marine.copernicus.eu/documents/PUM/CMEMS-OC-PUM-009-ALL.pdf), 2020.
- Courtier, P., Freydier, C., Geleyn, J.-F., Rabier, F., and Rochas, M.: The ARPEGE project at Météo-France, in: ECMWF workshop on numerical methods in atmospheric modeling, 2, pp. 193–231, ECMWF, Reading, UK, 1991.
- Craig, A., Valcke, S., and Coquart, L.: Development and performance of a new version of the OASIS coupler, OASIS3-MCT\_3.0, *Geoscientific Model Development*, 10, 3297–3308, <https://doi.org/10.5194/gmd-10-3297-2017>, <https://gmd.copernicus.org/articles/10/3297/2017/>, 660 2017.
- Cuxart, J., Bougeault, P., and Redelsperger, J.-L.: A turbulence scheme allowing for mesoscale and large-eddy simulations, *Quarterly Journal of the Royal Meteorological Society*, 126, 1–30, <https://doi.org/10.1002/qj.49712656202>, <http://doi.wiley.com/10.1002/qj.49712656202>, 2000.
- Darmaraki, S., Somot, S., Sevault, F., Nabat, P., Cabos Narvaez, W. D., Cavicchia, L., Djurdjevic, V. m., Li, L., Sannino, G., and Sein, D. V.: 665 Future evolution of Marine Heatwaves in the Mediterranean Sea, *Climate Dynamics*, <https://doi.org/10.1007/s00382-019-04661-z>, 2019.
- De Bono, A., Peduzzi, P., Kluser, S., and Giuliani, G.: Impacts of Summer 2003 Heat Wave in Europe, p. 4, <https://archive-ouverte.unige.ch/unige:32255>, iD: unige:32255, 2004.
- D’Ortenzio, F., Iudicone, D., de Boyer Montegut, C., Testor, P., Antoine, D., Marullo, S., Santoleri, R., and Madec, G.: Seasonal variability of the mixed layer depth in the mediterranean sea as derived from in situ profiles, *Geophysical Research Letters*, 32, 670 <https://doi.org/10.1029/2005GL022463>, 2005.

- Ducrocq, V., Davolio, S., Ferretti, R., Flamant, C., Homar Santaner, V., Kalthoff, N., Richard, E., and Wernli, H.: Advances in understanding and forecasting of heavy precipitation in Mediterranean through the HyMeX SOP1 field campaign, *Q. J. R. Meteorol. Soc.*, 142, 1–6, <https://doi.org/10.1002/qj.2856>, 2016.
- Echevin, V., Crepon, M., and Mortier, L.: Interaction of a Coastal Current with a Gulf: Application to the Shelf Circulation of the Gulf of Lions in the Mediterranean Sea, *Journal of Physical Oceanography*, 33, 188–206, [https://doi.org/10.1175/1520-0485\(2003\)033<0188:IOACCW>2.0.CO;2](https://doi.org/10.1175/1520-0485(2003)033<0188:IOACCW>2.0.CO;2), 2003.
- ECMWF: IFS Documentation CY47R1, <https://www.ecmwf.int/en/publications/ifs-documentation>, 2020.
- Estournel, C., Broche, P., Marsaleix, P., Devenon, J.-L., Auclair, F., and Vehil, R.: The Rhone River Plume in Unsteady Conditions: Numerical and Experimental Results, *Estuarine, Coastal and Shelf Science*, 53, 25 – 38, <https://doi.org/10.1006/ecss.2000.0685>, 2001.
- 675 Eyring, V., Bony, S., Meehl, G. A., Senior, C. A., Stevens, B., Stouffer, R. J., and Taylor, K. E.: Overview of the Coupled Model Intercomparison Project Phase 6 (CMIP6) experimental design and organization, *Geoscientific Model Development*, 9, 1937–1958, <https://doi.org/10.5194/gmd-9-1937-2016>, <https://gmd.copernicus.org/articles/9/1937/2016/>, 2016.
- 680 Fairall, C. W., Bradley, E. F., Hare, J. E., Grachev, A. A., and Edson, J. B.: Bulk Parameterization of Air-Sea Fluxes: Updates and Verification for the COARE Algorithm, *Journal of Climate*, 16, 571–591, [https://doi.org/10.1175/1520-0442\(2003\)016<0571:BPOASF>2.0.CO;2](https://doi.org/10.1175/1520-0442(2003)016<0571:BPOASF>2.0.CO;2), <http://journals.ametsoc.org/doi/abs/10.1175/1520-0442%282003%29016%3C0571%3ABPOASF%3E2.0.CO%3B2>, 2003.
- 685 Fouquart, Y. and Bonnel, B.: Computations of Solar Heating of the Earth’s Atmosphere : A New Parameterization, *Beitrage zur Physik der Atmosphäre*, 53, 35–62, 1980.
- Fujiwhara, S.: The natural tendency towards symmetry of motion and its application as a principle in meteorology, *Q. J. R. Meteorol. Soc.*, 47, 287–293, 1921.
- 690 García, M. J. L., Millot, C., Font, J., and García-Ladona, E.: Surface circulation variability in the Balearic Basin, *Journal of Geophysical Research: Oceans*, 99, 3285–3296, <https://doi.org/10.1029/93JC02114>, 1994.
- Grifoll, M., Navarro, J., Pallares, E., Ràfols, L., Espino, M., and Palomares, A.: Ocean–atmosphere–wave characterisation of a wind jet (Ebro shelf, NW Mediterranean Sea), *Nonlinear Processes in Geophysics*, 23, 143–158, <https://doi.org/10.5194/npg-23-143-2016>, <https://npg.copernicus.org/articles/23/143/2016/>, 2016.
- 695 Gutcknecht, E., Reffray, G., Mignot, A., Dabrowski, T., and Sotillo, M. G.: Modelling the marine ecosystem of Iberia–Biscay–Ireland (IBI) European waters for CMEMS operational applications, *Ocean Science*, 15, 1489–1516, <https://doi.org/10.5194/os-15-1489-2019>, 2019.
- Hewitt, H. T., Roberts, M., Mathiot, P., Biastoch, A., Blockley, E., Chassignet, E. P., Fox-Kemper, B., Hyder, P., Marshall, D. P., Popova, E., Treguier, A.-M., Zanna, L., Yool, A., Yu, Y., Beadling, R., Bell, M., Kuhlbrodt, T., Arsouze, T., Bellucci, A., Castruccio, F., Gan, B., Putrasahan, D., Roberts, C. D., Van Roekel, L., and Zhang, Q.: Resolving and Parameterising the Ocean Mesoscale in Earth System Models, *Current Climate Change Reports*, 6, 137–152, <https://doi.org/10.1007/s40641-020-00164-w>, 2020.
- 700 Intergovernmental Panel on Climate Change, ed.: *Climate Change 2013 - The Physical Science Basis: Working Group I Contribution to the Fifth Assessment Report of the Intergovernmental Panel on Climate Change*, Cambridge University Press, Cambridge, <https://doi.org/10.1017/CBO9781107415324>, <http://ebooks.cambridge.org/ref/id/CBO9781107415324>, 2014.
- Jullien, S., Marchesiello, P., Menkes, C. E., Lefèvre, J., Jourdain, N. C., Samson, G., and Lengaigne, M.: Ocean feedback to tropical cyclones: climatology and processes, *Climate Dynamics*, 43, 2831–2854, <https://doi.org/10.1007/s00382-014-2096-6>, <http://link.springer.com/10.1007/s00382-014-2096-6>, 2014.
- 705 Jullien, S., Masson, S., Oerder, V., Samson, G., Colas, F., and Renault, L.: Impact of Ocean-Atmosphere Current Feedback on Ocean Mesoscale Activity: Regional Variations and Sensitivity to Model Resolution, *Journal of Cli-*

- mate, 33, 2585–2602, <https://doi.org/10.1175/JCLI-D-19-0484.1>, <https://journals.ametsoc.org/jcli/article/33/7/2585/346415/>  
710 Impact-of-OceanAtmosphere-Current-Feedback-on, 2020.
- Kain, J. S. and Fritsch, J. M.: A One-Dimensional Entraining/Detraining Plume Model and Its Application in Convective Parameterization, *Journal of Atmospheric Sciences*, 47, 2784 – 2802, [https://doi.org/10.1175/1520-0469\(1990\)047<2784:AODEPM>2.0.CO;2](https://doi.org/10.1175/1520-0469(1990)047<2784:AODEPM>2.0.CO;2), [https://journals.ametsoc.org/view/journals/atsc/47/23/1520-0469\\_1990\\_047\\_2784\\_aodepm\\_2\\_0\\_co\\_2.xml](https://journals.ametsoc.org/view/journals/atsc/47/23/1520-0469_1990_047_2784_aodepm_2_0_co_2.xml), place: Boston MA, USA Publisher: American Meteorological Society, 1990.
- 715 Kendon, M., McCarthy, M., Jevrejeva, S., Matthews, A., and Legg, T.: State of the UK climate 2018, *International Journal of Climatology*, 39, 1–55, <https://doi.org/https://doi.org/10.1002/joc.6213>, <https://rmets.onlinelibrary.wiley.com/doi/abs/10.1002/joc.6213>, 2019.
- Le Boyer, A., Charria, G., Le Cann, B., Lazure, P., and Marié, L.: Circulation on the shelf and the upper slope of the Bay of Biscay, *Continental Shelf Research*, 55, 97–107, <https://doi.org/https://doi.org/10.1016/j.csr.2013.01.006>, <https://www.sciencedirect.com/science/article/pii/S0278434313000162>, 2013.
- 720 Lebeau-pin Brossier, C., Léger, F., Giordani, H., Beuvier, J., Bouin, M., Ducrocq, V., and Fourrié, N.: Dense water formation in the north-western Mediterranean area during HyMeX-SOP2 in 1/36° ocean simulations: Ocean-atmosphere coupling impact, *Journal of Geophysical Research: Oceans*, 122, 5749–5773, <https://doi.org/10.1002/2016JC012526>, <https://onlinelibrary.wiley.com/doi/abs/10.1002/2016JC012526>, 2017.
- Leclair, M. and Madec, G.: A conservative leapfrog time stepping method, *Ocean Modelling*, 30, 88–94, <https://doi.org/10.1016/j.ocemod.2009.06.006>, <https://linkinghub.elsevier.com/retrieve/pii/S1463500309001206>, 2009.
- 725 Lellouche, J.-M., Greiner, E., Le Galloudec, O., Garric, G., Regnier, C., Drevillon, M., Benkiran, M., Testut, C.-E., Bourdalle-Badie, R., Gasparin, F., Hernandez, O., Levier, B., Drillet, Y., Remy, E., and Le Traon, P.-Y.: Recent updates to the Copernicus Marine Service global ocean monitoring and forecasting real-time 1/12° high-resolution system, *Ocean Science*, 14, 1093–1126, <https://doi.org/10.5194/os-14-1093-2018>, <https://os.copernicus.org/articles/14/1093/2018/>, 2018.
- 730 Lewis, H. W., Castillo Sanchez, J. M., Arnold, A., Fallmann, J., Saulter, A., Graham, J., Bush, M., Siddorn, J., Palmer, T., Lock, A., Edwards, J., Bricheno, L., Martínez-de la Torre, A., and Clark, J.: The UKC3 regional coupled environmental prediction system, *Geoscientific Model Development*, 12, 2357–2400, <https://doi.org/10.5194/gmd-12-2357-2019>, <https://gmd.copernicus.org/articles/12/2357/2019/>, 2019.
- Liberato, M. L. R., Pinto, J. G., Trigo, R. M., Ludwig, P., Ordóñez, P., Yuen, D., and Trigo, I. F.: Explosive development of winter storm Xynthia over the subtropical North Atlantic Ocean, *Natural Hazards and Earth System Sciences*, 13, 2239–2251, <https://doi.org/10.5194/nhess-13-2239-2013>, <https://nhess.copernicus.org/articles/13/2239/2013/>, 2013.
- 735 Ličer, M., Smerkol, P., Fettich, A., Ravdas, M., Papapostolou, A., Mantziafou, A., Strajnar, B., Cedilnik, J., Jeromel, M., Jerman, J., Petan, S., Malačič, V., and Sofianos, S.: Modeling the ocean and atmosphere during an extreme bora event in northern Adriatic using one-way and two-way atmosphere–ocean coupling, *Ocean Science*, 12, 71–86, <https://doi.org/10.5194/os-12-71-2016>, <https://os.copernicus.org/articles/12/71/2016/>, 2016.
- 740 Léger, F., Lebeau-pin Brossier, C., Giordani, H., Arsouze, T., Beuvier, J., Bouin, M.-N., Bresson, E., Ducrocq, V., Fourrié, N., and Nuret, M.: Dense water formation in the north-western Mediterranean area during HyMeX-SOP2 in 1/36° ocean simulations: Sensitivity to initial conditions, *Journal of Geophysical Research: Oceans*, 121, 5549–5569, <https://doi.org/https://doi.org/10.1002/2015JC011542>, <https://agupubs.onlinelibrary.wiley.com/doi/abs/10.1002/2015JC011542>, 2016.
- Ma, F., Yuan, X., Jiao, Y., and Ji, P.: Unprecedented Europe Heat in June–July 2019: Risk in the Historical and Future Context, *Geophysical Research Letters*, 47, e2020GL087809, <https://doi.org/https://doi.org/10.1029/2020GL087809>, <https://agupubs.onlinelibrary.wiley.com/doi/abs/10.1029/2020GL087809>, e2020GL087809 2020GL087809, 2020.
- 745

- Madec, G., Bourdallé-Badie, R., Pierre-Antoine Bouttier, Bricaud, C., Bruciaferri, D., Calvert, D., Chanut, J., Clementi, E., Coward, A., Delrosso, D., Ethé, C., Flavoni, S., Graham, T., Harle, J., Iovino, D., Lea, D., Lévy, C., Lovato, T., Martin, N., Masson, S., Mocavero, S., Paul, J., Rousset, C., Storkey, D., Storto, A., and Vancoppenolle, M.: NEMO ocean engine, <https://doi.org/10.5281/ZENODO.1472492>, <https://zenodo.org/record/1472492>, 2017.
- 750 Mandement, M. and Caumont, O.: A numerical study to investigate the roles of former hurricane Leslie, orography, and evaporative cooling in the 2018 Aude heavy precipitation event, preprint, Links between the atmospheric water cycle and weather systems, <https://doi.org/10.5194/wcd-2020-54>, <https://wcd.copernicus.org/preprints/wcd-2020-54/>, 2020.
- Maraldi, C., Chanut, J., Levier, B., Ayoub, N., De Mey, P., Reffray, G., Lyard, F., Cailleau, S., Drévilion, M., Fanjul, E. A., Sotillo, M. G., Marsaleix, P., and the Mercator Research and Development Team: NEMO on the shelf: assessment of the Iberia–Biscay–Ireland configuration, *Ocean Science*, 9, 745–771, <https://doi.org/10.5194/os-9-745-2013>, 2013.
- 755 Masson, V.: A Physically-Based Scheme For The Urban Energy Budget In Atmospheric Models, *Boundary-Layer Meteorology*, 94, 357–397, <https://doi.org/10.1023/A:1002463829265>, <http://link.springer.com/10.1023/A:1002463829265>, 2000.
- Masson, V., Le Moigne, P., Martin, E., Faroux, S., Alias, A., Alkama, R., Belamari, S., Barbu, A., Boone, A., Bouysse, F., Brousseau, P., Brun, E., Calvet, J.-C., Carrer, D., Decharme, B., Delire, C., Donier, S., Essaouini, K., Gibelin, A.-L., Giordani, H., Habets, F., Jidane, M., Kerdraon, G., Kourzeneva, E., Lafaysse, M., Lafont, S., Lebeaupin Brossier, C., Lemonsu, A., Mahfouf, J.-F., Marguinaud, P., Mokhtari, M., Morin, S., Pigeon, G., Salgado, R., Seity, Y., Taillefer, F., Tanguy, G., Tulet, P., Vincendon, B., Vionnet, V., and Voldoire, A.: The SURFEXv7.2 land and ocean surface platform for coupled or offline simulation of earth surface variables and fluxes, *Geoscientific Model Development*, 6, 929–960, <https://doi.org/10.5194/gmd-6-929-2013>, <https://www.geosci-model-dev.net/6/929/2013/>, 2013.
- 760 Meehl, G. A.: Development of global coupled ocean-atmosphere general circulation models, *Climate Dynamics*, 5, 19–33, <https://doi.org/10.1007/BF00195851>, <http://link.springer.com/10.1007/BF00195851>, 1990.
- Meroni, A. N., Renault, L., Parodi, A., and Pasquero, C.: Role of the Oceanic Vertical Thermal Structure in the Modulation of Heavy Precipitations Over the Ligurian Sea, *Pure App. Geophys.*, 175, 4111–4130, <https://doi.org/10.1007/s00024-018-2002-y>, 2018.
- Meurdesoif, Y.: XIOS, in: Second Workshop on Coupling Technologies for Earth System Models (CW2013), NCAR, Boulder, CO, USA, <http://forge.ipsl.jussieu.fr/iobserver/raw-attachment/wiki/WikiStart/XIOS-BOULDER.pdf>, 2013.
- 770 Miglietta, M. M. and Rotunno, R.: Development mechanisms for Mediterranean tropical-like cyclones (medicanes), *Quarterly Journal of the Royal Meteorological Society*, 145, 1444–1460, <https://doi.org/https://doi.org/10.1002/qj.3503>, <https://rmets.onlinelibrary.wiley.com/doi/abs/10.1002/qj.3503>, 2019.
- Millot, C.: Mesoscale and seasonal variabilities of the circulation in the western Mediterranean, *Dyn. Atmos. Oc.*, 15, 179–214, [https://doi.org/10.1016/0377-0265\(91\)90020-G](https://doi.org/10.1016/0377-0265(91)90020-G), 1991.
- 775 Millot, C. and Taupier-Letage, I.: Circulation in the Mediterranean Sea, in: *The Mediterranean Sea*, edited by Saliot, A., pp. 29–66, Springer Berlin Heidelberg, Berlin, Heidelberg, <https://doi.org/10.1007/b107143>, 2005.
- Millot, C., Taupier-Letage, I., and Benzohra, M.: The Algerian eddies, *Earth-Science Reviews*, 27, 203–219, [https://doi.org/10.1016/0012-8252\(90\)90003-E](https://doi.org/10.1016/0012-8252(90)90003-E), 1990.
- 780 Mlawer, E. J., Taubman, S. J., Brown, P. D., Iacono, M. J., and Clough, S. A.: Radiative transfer for inhomogeneous atmospheres: RRTM, a validated correlated-k model for the longwave, *Journal of Geophysical Research: Atmospheres*, 102, 16 663–16 682, <https://doi.org/10.1029/97JD00237>, <http://doi.wiley.com/10.1029/97JD00237>, 1997.
- Mogensen, K. S., Hewson, T., Keeley, S., and Magnusson, L.: Effects of ocean coupling on weather forecasts, ECMWF newsletter, pp. 6–7, <https://www.ecmwf.int/en/newsletter/156/news/effects-ocean-coupling-weather-forecasts>, 2018.

- 785 Noilhan, J. and Planton, S.: A Simple Parameterization of Land Surface Processes for Meteorological Models, *Monthly Weather Review*, 117, 536–549, [https://doi.org/10.1175/1520-0493\(1989\)117<0536:ASPOLS>2.0.CO;2](https://doi.org/10.1175/1520-0493(1989)117<0536:ASPOLS>2.0.CO;2), <http://journals.ametsoc.org/doi/abs/10.1175/1520-0493%281989%29117%3C0536%3AASPOLS%3E2.0.CO%3B2>, 1989.
- Obermann, A., Bastin, S., Belamari, S., Conte, D., Gaertner, M. A., Li, L., and Ahrens, B.: Mistral and Tramontane wind speed and wind direction patterns in regional climate simulations, *Climate Dynamics*, 51, 1059 – 1076, <https://doi.org/10.1007/s00382-016-3053-3>, <https://doi.org/10.1007/s00382-016-3053-3>, 2018.
- 790 Orain, F., Roquet, H., and Saux Picart, E.: European Near Real Time Level 3S Sea Surface Temperature Product SST\_EUR\_L3S\_NRT\_OBSERVATIONS\_010\_009\_a, Quality Information Document #1.6, Tech. rep., Copernicus Marine Environment Monitoring Service, <https://catalogue.marine.copernicus.eu/documents/QUID/CMEMS-SST-QUID-010-009-a.pdf>, 2021.
- Pasch, R. J. and Roberts, D. P.: Hurricane Leslie, Tech. rep., National Hurricane Center Tropical Cyclone Report, [https://www.nhc.noaa.gov/data/tcr/AL132018\\_Leslie.pdf](https://www.nhc.noaa.gov/data/tcr/AL132018_Leslie.pdf), 2019.
- 795 Pellerin, P., Ritchie, H., Saucier, F. J., Roy, F., Desjardins, S., Valin, M., and Lee, V.: Impact of a Two-Way Coupling between an Atmospheric and an Ocean-Ice Model over the Gulf of St. Lawrence, *Monthly Weather Review*, 132, 1379 – 1398, [https://doi.org/10.1175/1520-0493\(2004\)132<1379:IOATCB>2.0.CO;2](https://doi.org/10.1175/1520-0493(2004)132<1379:IOATCB>2.0.CO;2), [https://journals.ametsoc.org/view/journals/mwre/132/6/1520-0493\\_2004\\_132\\_1379\\_ioatcb\\_2.0.co\\_2.xml](https://journals.ametsoc.org/view/journals/mwre/132/6/1520-0493_2004_132_1379_ioatcb_2.0.co_2.xml), 2004.
- 800 Pianezze, J., Barthe, C., Bielli, S., Tulet, P., Jullien, S., Cambon, G., Bousquet, O., Claeys, M., and Cordier, E.: A New Coupled Ocean-Waves-Atmosphere Model Designed for Tropical Storm Studies: Example of Tropical Cyclone Bejisa (2013-2014) in the South-West Indian Ocean, *Journal of Advances in Modeling Earth Systems*, 10, 801–825, <https://doi.org/10.1002/2017MS001177>, <http://doi.wiley.com/10.1002/2017MS001177>, 2018.
- Pinty, J.-P. and Jabouille, P.: A mixed-phase cloud parameterization for use in a mesoscale non-hydrostatic model: simulations of a squall line and of orographic precipitation, in: *Proc. Conf. of Cloud Physics*, edited by Amer. Meteor. soc., pp. 217 – 220, Everett, WA, USA, [http://mesonh.aero.obs-mip.fr/mesonh/dir\\_publication/pinty\\_jabouille\\_ams\\_ccp1998.pdf](http://mesonh.aero.obs-mip.fr/mesonh/dir_publication/pinty_jabouille_ams_ccp1998.pdf), 1998.
- 805 Pullen, J., Doyle, J. D., and Signell, R. P.: Two-way air-sea coupling: A study of the Adriatic, *Mon. Wea. Rev.*, 135, 1465–1483, <https://doi.org/10.1175/MWR3137.1>, 2006.
- Pullen, J., Allard, R., Seo, H., Miller, A. J., Chen, S., Pezzi, L. P., Smith, T., Chu, P., Alves, J., and Caldeira, R.: Coupled ocean-atmosphere forecasting at short and medium time scales, *J. Mar. Res.*, 75, 877–921, <https://doi.org/10.1357/002224017823523991>, 2017.
- 810 Rainaud, R., Lebeaupin Brossier, C., Ducrocq, V., Giordani, H., Nuret, M., Fourrié, N., Bouin, M.-N., Taupier-Letage, I., and Legain, D.: Characterization of air–sea exchanges over the Western Mediterranean Sea during HyMeX SOP1 using the AROME–WMED model, *Quarterly Journal of the Royal Meteorological Society*, 142, 173–187, <https://doi.org/https://doi.org/10.1002/qj.2480>, <https://rmets.onlinelibrary.wiley.com/doi/abs/10.1002/qj.2480>, 2016.
- 815 Rainaud, R., Lebeaupin Brossier, C., Ducrocq, V., and Giordani, H.: High-resolution air-sea coupling impact on two heavy precipitation events in the Western Mediterranean: Air-Sea Coupling Impact on Two Mediterranean HPEs, *Quarterly Journal of the Royal Meteorological Society*, 143, 2448–2462, <https://doi.org/10.1002/qj.3098>, <http://doi.wiley.com/10.1002/qj.3098>, 2017.
- 820 Redelsperger, J.-L., Bouin, M.-N., Pianezze, J., Garnier, V., and Marié, L.: Impact of a sharp, small-scale SST front on the marine atmospheric boundary layer on the Iroise Sea: Analysis from a hectometric simulation, *Quarterly Journal of the Royal Meteorological Society*, 145, 3692–3714, <https://doi.org/https://doi.org/10.1002/qj.3650>, <https://rmets.onlinelibrary.wiley.com/doi/abs/10.1002/qj.3650>, 2019.

- Renault, L., Lemarié, F., and Arsouze, T.: On the implementation and consequences of the oceanic currents feedback in ocean–atmosphere coupled models, *Ocean Modelling*, 141, 101–423, <https://doi.org/10.1016/j.ocemod.2019.101423>, <https://linkinghub.elsevier.com/retrieve/pii/S1463500319300459>, 2019a.
- Renault, L., Marchesiello, P., Masson, S., and McWilliams, J. C.: Remarkable Control of Western Boundary Currents by *Eddy Killing*, a Mechanical Air-Sea Coupling Process, *Geophysical Research Letters*, 46, 2743–2751, <https://doi.org/10.1029/2018GL081211>, <https://onlinelibrary.wiley.com/doi/abs/10.1029/2018GL081211>, 2019b.
- Sauvage, C., Lebeaupin Brossier, C., and Bouin, M.-N.: Towards kilometer-scale ocean–atmosphere–wave coupled forecast: a case study on a Mediterranean heavy precipitation event, *Atmospheric Chemistry and Physics*, 21, 11 857–11 887, <https://doi.org/10.5194/acp-21-11857-2021>, <https://acp.copernicus.org/articles/21/11857/2021/>, 2021.
- Seity, Y., Brousseau, P., Malardel, S., Hello, G., Bénard, P., Bouttier, F., Lac, C., and Masson, V.: The AROME-France Convective-Scale Operational Model, *Monthly Weather Review*, 139, 976–991, <https://doi.org/10.1175/2010MWR3425.1>, <http://journals.ametsoc.org/doi/10.1175/2010MWR3425.1>, 2011.
- Shukla, J., Palmer, T. N., Hagedorn, R., Hoskins, B., Kinter, J., Marotzke, J., Miller, M., and Slingo, J.: Toward a New Generation of World Climate Research and Computing Facilities, *Bulletin of the American Meteorological Society*, 91, 1407–1412, <https://doi.org/10.1175/2010BAMS2900.1>, <https://journals.ametsoc.org/doi/10.1175/2010BAMS2900.1>, 2010.
- Simpson, J. H., Bos, W. G., Schirmer, F., Souza, A. J., Rippeth, T. P., Jones, S. E., and Hydes, D.: Periodic stratification in the rhine ROFI in the north-sea, <https://archimer.ifremer.fr/doc/00099/21050/>, 1993.
- Small, R., Carniel, S., Campbell, T., Teixeira, J., and Allard, R.: The response of the Ligurian and Tyrrhenian Seas to a summer Mistral event: A coupled atmosphere–ocean approach, *Ocean Modelling*, 48, 30 – 44, <https://doi.org/https://doi.org/10.1016/j.ocemod.2012.02.003>, <http://www.sciencedirect.com/science/article/pii/S1463500312000339>, 2012.
- Small, R. J., Campbell, T., Teixeira, J., Carniel, S., Smith, T. A., Dykes, J., Chen, S., and Allard, R.: Air–Sea Interaction in the Ligurian Sea: Assessment of a Coupled Ocean–Atmosphere Model Using In Situ Data from LASIE07, *Monthly Weather Review*, 139, 1785 – 1808, <https://doi.org/10.1175/2010MWR3431.1>, <https://journals.ametsoc.org/view/journals/mwre/139/6/2010mwr3431.1.xml>, 2011.
- Smith, R. K., Montgomery, M. T., and Van Sang, N.: Tropical cyclone spin-up revisited, *Quarterly Journal of the Royal Meteorological Society*, 135, 1321–1335, <https://doi.org/10.1002/qj.428>, <http://doi.wiley.com/10.1002/qj.428>, 2009.
- Sotillo, M. G., Cailleau, S., Lorente, P., Levier, B., Aznar, R., Reffray, G., Amo-Baladron, A., Chanut, J., Benkiran, M., and Alvarez-Fanjul, E.: The MyOcean IBI Ocean Forecast and Reanalysis Systems: operational products and roadmap to the future Copernicus Service, *Journal of Operational Oceanography*, 8, 63–79, <https://doi.org/10.1080/1755876X.2015.1014663>, 2015.
- Sotillo, M. G., Levier, B., Lorente, P., Guihou, K., Aznar, R., Amo, A., Aouf, L., and Ghantous, M.: Quality information document for Atlantic Iberian Biscay Irish-Ocean Physics Analysis and Forecasting Product (CMEMS-IBI-QUID-005-001), Tech. rep., Copernicus Marine Environment Monitoring Service, <https://catalogue.marine.copernicus.eu/documents/QUID/CMEMS-IBI-QUID-005-001.pdf>, 2021.
- Stockdale, T. N., Anderson, D. L. T., Alves, J. O. S., and Balmaseda, M. A.: Global seasonal rainfall forecasts using a coupled ocean–atmosphere model, *Nature*, 392, 370–373, <https://doi.org/10.1038/32861>, 1998.
- Szekely, T., Gourrion, J., Pouliquen, S., and Reverdin, G.: The CORA 5.2 dataset for global in situ temperature and salinity measurements: data description and validation, *Ocean Science*, 15, 1601–1614, <https://doi.org/https://doi.org/10.5194/os-15-1601-2019>, 2019.
- Taszarek, M., Allen, J., Púčik, T., Groenemeijer, P., Czernecki, B., Kolendowicz, L., Lagouvardos, K., Kotroni, V., and Schulz, W.: A Climatology of Thunderstorms across Europe from a Synthesis of Multiple Data Sources, *Journal of Climate*, 32, 1813 – 1837, <https://doi.org/10.1175/JCLI-D-18-0372.1>, <https://journals.ametsoc.org/view/journals/clim/32/6/jcli-d-18-0372.1.xml>, 2019.



- Taylor, J. P., Edwards, J. M., Glew, M. D., Hignett, P., and Slingo, A.: Studies with a flexible new radiation code. II: Comparisons with aircraft  
860 short-wave observations, *Quarterly Journal of the Royal Meteorological Society*, 122, 839–861, <https://doi.org/10.1002/qj.49712253204>,  
<http://doi.wiley.com/10.1002/qj.49712253204>, 1996.
- Testor, P., Bosse, A., Houpert, L., Margirier, F., Mortier, L., Legoff, H., Dausse, D., Labaste, M., Karstensen, J., Hayes, D., Olita, A., Ribotti,  
A., Schroeder, K., Chiggiato, J., Onken, R., Heslop, E., Mourre, B., D’ortenzio, F., Mayot, N., Lavigne, H., de Fommervault, O., Coppola,  
L., Prieur, L., Taillandier, V., Durrieu de Madron, X., Bourrin, F., Many, G., Damien, P., Estournel, C., Marsaleix, P., Taupier-Letage, I.,  
865 Raimbault, P., Waldman, R., Bouin, M.-N., Giordani, H., Caniaux, G., Somot, S., Ducrocq, V., and Conan, P.: Multiscale Observations of  
Deep Convection in the Northwestern Mediterranean Sea During Winter 2012–2013 Using Multiple Platforms, *Journal of Geophysical  
Research: Oceans*, 123, 1745–1776, <https://doi.org/10.1002/2016JC012671>, 2018.
- Thompson, B., Sanchez, C., Heng, B. C. P., Kumar, R., Liu, J., Huang, X.-Y., and Tkalich, P.: Development of a MetUM (v 11.1) and NEMO  
(v 3.6) coupled operational forecast model for the Maritime Continent – Part 1: Evaluation of ocean forecasts, *Geoscientific Model  
870 Development*, 14, 1081–1100, <https://doi.org/10.5194/gmd-14-1081-2021>, <https://gmd.copernicus.org/articles/14/1081/2021/>, 2021.
- Trigo, I. F.: Climatology and interannual variability of storm-tracks in the Euro-Atlantic sector: a comparison between ERA-40  
and NCEP/NCAR reanalyses, *Climate Dynamics*, 26, 127 – 143, <https://doi.org/10.1007/s00382-005-0065-9>, <https://doi.org/10.1007/s00382-005-0065-9>, 2006.
- Trigo, I. F., Bigg, G. R., and Davies, T. D.: Climatology of Cyclogenesis Mechanisms in the Mediterranean, *Monthly Weather Review*, 130,  
875 549 – 569, [https://doi.org/10.1175/1520-0493\(2002\)130<0549:COCMIT>2.0.CO;2](https://doi.org/10.1175/1520-0493(2002)130<0549:COCMIT>2.0.CO;2), [https://journals.ametsoc.org/view/journals/mwre/130/3/1520-0493\\_2002\\_130\\_0549\\_cocmit\\_2.0.co\\_2.xml](https://journals.ametsoc.org/view/journals/mwre/130/3/1520-0493_2002_130_0549_cocmit_2.0.co_2.xml), 2002.
- Umlauf, L. and Burchard, H.: A generic length-scale equation for geophysical turbulence models, *Journal of Marine Research*, 61,  
235–265, <https://doi.org/10.1357/002224003322005087>, [http://www.ingentaselect.com/rpsv/cgi-bin/cgi?ini=xref&body=linker&reqdoi=](http://www.ingentaselect.com/rpsv/cgi-bin/cgi?ini=xref&body=linker&reqdoi=10.1357/002224003322005087)  
[10.1357/002224003322005087](http://www.ingentaselect.com/rpsv/cgi-bin/cgi?ini=xref&body=linker&reqdoi=10.1357/002224003322005087), 2003.
- 880 Umlauf, L. and Burchard, H.: Second-order turbulence closure models for geophysical boundary layers. A review of recent work, *Continental  
Shelf Research*, 25, 795–827, <https://doi.org/10.1016/j.csr.2004.08.004>, <https://linkinghub.elsevier.com/retrieve/pii/S0278434304003152>,  
2005.
- Valcke, S.: The OASIS3 coupler: a European climate modelling community software, *Geoscientific Model Development*, 6, 373–388,  
<https://doi.org/10.5194/gmd-6-373-2013>, <https://gmd.copernicus.org/articles/6/373/2013/>, 2013.
- 885 van Aken, H. M.: Surface currents in the Bay of Biscay as observed with drifters between 1995 and 1999, *Deep Sea Research Part I: Oceano-  
graphic Research Papers*, 49, 1071–1086, [https://doi.org/https://doi.org/10.1016/S0967-0637\(02\)00017-1](https://doi.org/https://doi.org/10.1016/S0967-0637(02)00017-1), <https://www.sciencedirect.com/science/article/pii/S0967063702000171>, 2002.
- Vilibić, I., Mihanović, H., Janeković, I., Denamiel, C., Poulain, P.-M., Orlić, M., Dunić, N., Dadić, V., Pasarić, M., Muslim, S., Gerin,  
R., Matić, F., Šepić, J., Mauri, E., Kokkini, Z., Tudor, M., Kovač, v., and Džoić, T.: Wintertime dynamics in the coastal northeastern  
890 Adriatic Sea: the NAdEx 2015 experiment, *Ocean Science*, 14, 237–258, <https://doi.org/10.5194/os-14-237-2018>, <https://os.copernicus.org/articles/14/237/2018/>, 2018.
- Viúdez, A., Pinot, J.-M., and Haney, R. L.: On the upper layer circulation in the Alboran Sea, *Journal of Geophysical Research: Oceans*, 103,  
21 653–21 666, <https://doi.org/https://doi.org/10.1029/98JC01082>, <https://agupubs.onlinelibrary.wiley.com/doi/abs/10.1029/98JC01082>,  
1998.
- 895 Voltaire, A., Decharme, B., Pianezze, J., Lebeau-pin Brossier, C., Sevault, F., Seyfried, L., Garnier, V., Bielli, S., Valcke, S., Alias, A.,  
Accensi, M., Arduin, F., Bouin, M.-N., Ducrocq, V., Faroux, S., Giordani, H., Léger, F., Marsaleix, P., Rainaud, R., Redelsperger, J.-L.,

- Richard, E., and Riette, S.: SURFEX v8.0 interface with OASIS3-MCT to couple atmosphere with hydrology, ocean, waves and sea-ice models, from coastal to global scales, *Geoscientific Model Development*, 10, 4207–4227, <https://doi.org/10.5194/gmd-10-4207-2017>, <https://www.geosci-model-dev.net/10/4207/2017/>, 2017.
- 900 Warner, J. C., Armstrong, B., He, R., and Zambon, J. B.: Development of a Coupled Ocean–Atmosphere–Wave–Sediment Transport (COAWST) Modeling System, *Ocean Modelling*, 35, 230 – 244, <https://doi.org/10.1016/j.ocemod.2010.07.010>, <http://www.sciencedirect.com/science/article/pii/S1463500310001113>, 2010.
- Weusthoff, T., Ament, F., Arpagaus, M., and Rotach, M. W.: Assessing the Benefits of Convection-Permitting Models by Neighborhood Verification: Examples from MAP D-PHASE, *Monthly Weather Review*, 138, 3418–3433, <https://doi.org/10.1175/2010MWR3380.1>, <http://journals.ametsoc.org/doi/10.1175/2010MWR3380.1>, 2010.
- 905 Yelekçi, O., Charria, G., Capet, X., Reverdin, G., Sudre, J., and Yahia, H.: Spatial and seasonal distributions of frontal activity over the French continental shelf in the Bay of Biscay, *Continental Shelf Research*, 144, 65–79, <https://doi.org/https://doi.org/10.1016/j.csr.2017.06.015>, <https://www.sciencedirect.com/science/article/pii/S0278434317303308>, 2017.
